# McQ – An open-source multiplexed SARS-CoV-2 quantification platform

Sibylle C Vonesch<sup>1,\*</sup>, Danila Bredikhin<sup>1</sup>, Nikolay Dobrev<sup>2</sup>, Laura Villacorta<sup>3</sup>, Rozemarijn Kleinendorst<sup>1</sup>, Elisabetta Cacace<sup>1</sup>, Julia Flock<sup>2</sup>, Max Frank<sup>1</sup>, Ferris Jung<sup>3</sup>, Julia Kornienko<sup>1</sup>, Karin Mitosch<sup>1</sup>, Mireia Osuna-López<sup>3</sup>, Jürgen Zimmermann<sup>3</sup>, Stephan Göttig<sup>4</sup>, Axel Hamprecht<sup>5,6</sup>, Hans-Georg Kräusslich<sup>7,8</sup>, Michael Knop<sup>9,10,11,12</sup>, Athanasios Typas<sup>1</sup>, Lars M Steinmetz<sup>1,13,14,\*</sup>, Vladimir Benes<sup>3,\*</sup>, Kim Remans<sup>2,\*</sup>, and Arnaud R Krebs<sup>1,\*</sup>

<sup>1</sup>European Molecular Biology Laboratory (EMBL), Genome Biology Unit, 69117, Heidelberg, Germany.

<sup>2</sup>European Molecular Biology Laboratory (EMBL), Protein Expression and Purification Facility, 69117, Heidelberg, Germany.

<sup>3</sup>European Molecular Biology Laboratory (EMBL), Genomics Core Facility, 69117, Heidelberg, Germany.

<sup>4</sup>Institute of Medical Microbiology and Infection Control, Hospital of Goethe University, Frankfurt am Main, Germany.

<sup>5</sup>Institut für medizinische Mikrobiologie, Immunologie und Hygiene, 50935 Köln, Germany.

<sup>6</sup>Institut für med. Mikrobiologie und Virologie, Carl von Ossietzky Universität Oldenburg, 26129 Oldenburg, Germany.

<sup>7</sup>Center for Infectious Diseases, Department of Virology, Universitätsklinikum Heidelberg, 69117, Heidelberg, Germany.

<sup>8</sup>Deutsches Zentrum für Infektionsforschung, partner site Heidelberg, Heidelberg, Germany.

<sup>9</sup>Center for Molecular Biology of Heidelberg University (ZMBH), Heidelberg, Germany.

<sup>10</sup>German Center for Infection Research (DZIF), Heidelberg, Germany.

<sup>11</sup>German Cancer Research Center (DKFZ), Heidelberg, Germany.

<sup>12</sup>DKFZ-ZMBH Alliance, Heidelberg, Germany.

<sup>13</sup>Stanford Genome Technology Center, Stanford University, 3165 Porter Drive, Palo Alto, CA 94304, USA.

<sup>14</sup>Department of Genetics, Stanford University School of Medicine, Stanford, California, USA.

\*corresponding authors

Correspondence should be addressed to [sibylle.vonesch@embl.de](mailto:sibylle.vonesch@embl.de); [larsms@embl.de](mailto:larsms@embl.de);

[benes@embl.de](mailto:benes@embl.de); [kim.remans@embl.de](mailto:kim.remans@embl.de); [arnaud.krebs@embl.de](mailto:arnaud.krebs@embl.de).

McQ is a SARS-CoV-2 quantification assay that couples early-stage barcoding with high-throughput sequencing to enable multiplexed processing of thousands of samples. McQ is based on homemade enzymes to enable low-cost testing of large sample pools, circumventing supply chain shortages.

**Implementation of cost-efficient high-throughput methods for detection of RNA viruses such as SARS-CoV-2 is a potent strategy to curb ongoing and future pandemics. Here we describe Multiplexed SARS-CoV-2 Quantification platform (McQ), an in-expensive scalable framework for SARS-CoV-2 quantification in saliva samples. McQ is based on the parallel sequencing of barcoded amplicons generated from SARS-CoV-2 genomic RNA. McQ uses indexed, target-specific reverse transcription (RT) to generate barcoded cDNA for amplifying viral- and human-specific regions. The barcoding system enables early sample pooling to reduce hands-on time and makes the approach scalable to thousands of samples per sequencing run. Robust and accurate quantification of viral load is achieved by measuring the abundance of Unique Molecular Identifiers (UMIs) introduced during reverse transcription. The use of homemade reverse transcriptase and polymerase enzymes and non-proprietary buffers reduces RNA to library reagent costs to 92 cents/sample and circumvents potential supply chain shortages. We demonstrate the ability of McQ to robustly quantify various levels of viral RNA in 838 clinical samples and accurately diagnose positive and negative control samples in a testing workflow entailing self-sampling and automated RNA extraction from saliva. The implementation of McQ is modular, scalable and could be extended to other pathogenic targets in future.**

## Introduction

The coronavirus disease 2019 (COVID-19) has created a worldwide pandemic with over 59 million reported cases and 1.4 million recorded deaths worldwide<sup>1</sup>. While population-wide lockdown measures help to contain the rapid spread of the virus, thereby alleviating the burden on the health care system, they come at a severe economic and societal cost. Thus, lockdowns are not sustainable and alternative measures have been proposed to enable social and economic life to resume in the absence of an effective vaccine. These include social distancing measures and wearing of face protection in public spaces. Another important leverage in the fight to control the pandemic is increasing testing capacity to enable systematic surveillance testing, which combined with contact tracing and rapid isolation of infectious individuals can curtail viral spread<sup>2,3</sup>.

One of the challenges in the control of the COVID-19 pandemic is the high frequency of pre- or asymptomatic individuals that nevertheless display high levels of infectivity, making containment of transmission solely by symptomatic testing impossible<sup>4-6</sup>. This is the case for a majority of patients during the 2-7 days of the incubation phase<sup>7</sup> and lasts during the entire duration of the infection for approximately one fifth of individuals<sup>8</sup>. Detection of these asymptomatic spreaders could be achieved by the implementation of high-frequency population-scale surveillance testing. This would imply testing all members of a community repeatedly and regardless of symptoms. Achieving such a goal requires the development of scalable testing strategies that are accessible and cost efficient.

The gold standard COVID-19 diagnosis is by quantitative RT-qPCR against the viral genomic RNA that is contained in nasal or throat swab samples. The assay is highly

NOTE: This preprint reports new research that has not been certified by peer review and should not be used to guide clinical practice.

sensitive as it can detect very low abundances of viral particles. Current challenges include the use of commercial reagents that are subject to shortage, poor scalability and the high cost of the test, which preclude its adoption for population-scale testing of asymptomatic individuals. To circumvent these limitations, several alternative technologies have been developed<sup>9</sup>. These are based on the detection of antigens<sup>10–13</sup>, colorimetric assays<sup>14–18</sup>, CRISPR-based detection<sup>19–22</sup> or multiplexed detection of nucleic acids using NGS<sup>23–29</sup>.

Here we describe the development of an integrated high-throughput testing workflow for multiplexed SARS-CoV-2 quantification (McQ). The strategy entails parallel sequencing of barcoded amplicons generated from SARS-CoV-2 genomic RNA. Samples are barcoded by targeted reverse transcription against viral and human target regions to label each sample uniquely and enable pooling for barcoded amplification. Short read Illumina sequencing is used to quantify viral abundance in individual samples, using unique molecular identifiers added during reverse transcription for improved robustness and reduced variability in viral load quantification. Quality control, data analysis and diagnostics are performed using public open source code. To circumvent reagent shortages McQ largely relies on homemade enzymes and non-commercial buffers. We benchmarked McQ against existing technologies, and validated its performance through the parallel testing of >800 clinical samples. We combined McQ with automated RNA extraction from saliva samples from healthy volunteers and control samples. We confirm McQ diagnostics of all saliva samples as negative with LAMP and RT-qPCR, and show accurate diagnostics of positive and negative controls.

## Results

A key feature to enable scalability of SARS-CoV-2 genomic RNA quantification resides in lowering the per sample hands-on time. To that end, we adapted a reverse transcription barcoding strategy<sup>25</sup> to enable early sample pooling and parallelised processing. This enables scaling to thousands of samples per sequencing run. McQ uses Unique Molecular Identifiers (UMIs) to correct for PCR amplification bias, enabling more accurate quantification of viral load. The McQ sample preparation workflow relies mostly on homemade enzymes and reagents to circumvent supply chain shortages and to lower testing cost.

**McQ experimental design.** McQ is based on the parallel sequencing of barcoded amplicons generated from SARS-CoV-2 genomic RNA (Figure 1). McQ was established using RNA purified from clinical swab samples or saliva samples provided by healthy volunteers. We implemented an automated extraction workflow based on magnetic beads and non-proprietary buffers leading to good RNA yield and purity (Supplementary Results and Supplementary File 1). Note that McQ is compatible in principle with any upstream extraction protocol.

The McQ workflow starts with the distribution of extracted RNA into 96-well plates. McQ is designed to quantify the abundance of two viral targets, the E gene and nsp14 (ORF1) regions of the SARS-CoV-2 genome (using primers established by Charite<sup>30</sup> and HKU<sup>31</sup>); and a region of the human RNase P (RP) gene (recommended by the CDC<sup>32</sup>). The two SARS-CoV-2 targets serve as internal replicates for viral load. The human target ensures the generation of amplicons even in negative samples to guarantee pool complexity at the level of sample barcodes. The protocol uses a homemade reverse transcriptase as well as DNA polymerase that were benchmarked in the context of this study (see purification protocol in Supplementary File 2 and benchmarking in Supplementary Results).

Reverse transcription (RT) is performed using target-specific primers containing a barcode that uniquely labels each sample. Additionally, the RT primers add a UMI to each cDNA molecule, enabling to identify duplicates that may arise at the following PCR amplification step. After RT, excess primer is digested using Exonuclease I, and equivalent volumes of samples are pooled in batches of 96 for bead purification. The pooled cDNA is used as template in a PCR with three forward primers against individual targets (E, nsp14, RP) and a common reverse primer that anneals to the universal sequence introduced at the RT step. The PCR primers contain overhangs that allow adding indexed sequencing adapters compatible with Illumina sequencing in a second PCR. This enables direct multiplexing of tens of thousands of samples in one sequencing run. Our approach relies on sequences that are compatible with standard Illumina indexing and sequencing (Illumina read1 and 2, and P5 and P7 primers).

Samples are typically sequenced on a MiSeq or NextSeq platform using 75bp single end reads. Samples were demultiplexed using the plate and sample indexes. Several filters were implemented to remove primer dimers and other sources of noise. Then UMIs were counted for SARS-CoV-2 (E and nsp14) and human (RP) targets (Methods). The sample processing protocol is provided in Supplementary File 4. It can be completed within 4 hours, is easily scalable, and cost-efficient at <1 Euro/sample (from RNA to sequencing-ready library). We describe implementation of the full McQ workflow, including RNA extraction and production and integration of homemade enzymes in the Supplementary Results section.

**Establishing McQ assay sensitivity using synthetic SARS-CoV-2 RNA template.** To determine the sensitivity of McQ we processed 96 samples spiked with 0 to 100,000 copies of synthetic viral RNA (0-5000 cp/μl RNA sample). Swab or saliva samples carry heterogeneous amounts of human DNA and RNA. To test the effect of this heterogeneity, we added variable amounts of commercial human RNA or RNA/gDNA mix to each sample.

We retrieved all the 96 sample barcodes used to tag these samples, demonstrating the robustness of our approach to sample drop-off during pooled amplification. We observed a good correlation in the UMI counts for the E and nsp14

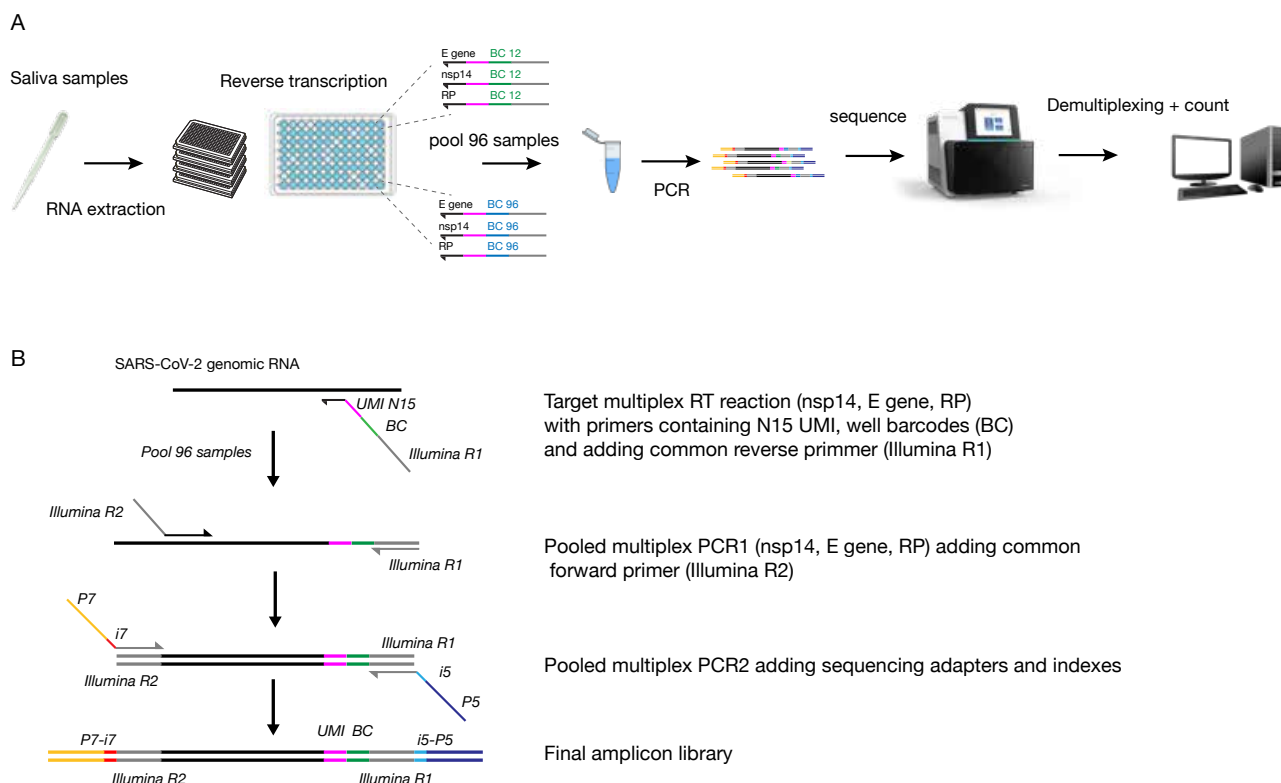

**Fig. 1. The McQ COVID-19 diagnostic assay.** (A) Schematic showing the workflow of reverse transcription with target-specific barcoded primers, PCR amplification of pooled cDNA, addition of sequencing adapters, Illumina sequencing and computational demultiplexing to quantify viral loads. (B) Multiplexing strategy. McQ uses target-specific reverse transcription (RT) primers to introduce a sample barcode (BC, green) during RT, enabling pooling of 96 samples for PCR enrichment of target sites. RT primers contain a unique molecular identifier (UMI) to label unique RNA templates in the sample, and a partial Illumina R1 primer to serve as common reverse primer during PCR1. Viral E and nsp14 as well as human RP regions are reverse transcribed and amplified in multiplexed reactions within a sample. The pooled cDNA of 96 samples is used as template in the first PCR to enrich target sites using three target-specific forward primers and the common reverse primer. Indexed P5 and P7 sequencing adapters are added in a short final PCR for sequencing of multiple 96-well plates in one run. The final amplicons contain three types of barcodes: UMIs to assign reads to unique RNA templates, sample barcodes (BC) to assign reads to a well of a 96-well plate, and i5/i7 indexes to assign reads to a 96-well plate.

amplicons, suggesting that both viral primer sets have similar sensitivity. Moreover, this high concordance shows that McQ quantification is not the result of particular biases of a specific primer set. Viral UMI counts were highly similar in presence of various amounts of human DNA and RNA (Figure 2). While the levels of the RP amplicon varied between samples, it did not significantly affect the counts for viral amplicons in the same sample. Together, this suggests that McQ is robust to the heterogeneity in human RNA and DNA content of swab and saliva samples.

We observed a good correlation between viral UMI counts and the number of SARS-CoV-2 molecules spiked into the sample (Figure 2), and high consistency between replicates, demonstrating that McQ accurately quantifies SARS-CoV-2 RNA. We observed background counts between 4 and 47 viral UMIs in control samples where no SARS-CoV-2 template was present. Similar viral counts were observed for samples containing up to 250 SARS-CoV-2 template molecules (12.5 cp/μl RNA sample), indicating that McQ sensitivity is in the range of 500 copies. This corresponds to 50 copies/μl in the extracted RNA sample.

**Detection of SARS-CoV-2 in clinical samples.** Having established McQ robustness and sensitivity, we benchmarked its ability to quantify viral RNA in a panel of 838 clinical

samples previously characterised by qPCR in a clinical diagnostics facility. We observed a good concordance between UMI counts for viral targets and Ct values determined by the RT-qPCR assay (Figure 3A). As for synthetic samples we detected all expected barcodes in each pool and consistent UMI counts for E and nsp14 regions. Viral UMI counts showed a linear correlation with Ct values for Ct values below 30, after which the counts flattened out to background levels. This suggests a limit of detection of our assay corresponding to a Ct of around 30 in RT-qPCR. This corresponds to approximately 50 copies/μl (estimates from Robert Koch Institute<sup>33,34</sup>) and is in line with our results with synthetic RNA (Figure 2). UMI counts for the RP amplicon were relatively constant across samples (Figure 3). We could not detect the RP target in 10% of the samples (85 out of 838). Sample to sample variability in RP counts likely reflects heterogeneity in sampling, extraction and RNA quality.

Compared to our experiment with synthetic control samples, we observed higher background UMI counts in clinical samples previously diagnosed as negative (Ct of 40) by RT-qPCR (Figure 3). Samples with Ct 40 had acceptable median UMI counts of 9 and 11 for the nsp14 and E targets respectively. However, the background UMI counts reached up to 2452 for some samples, that is two orders of magni-

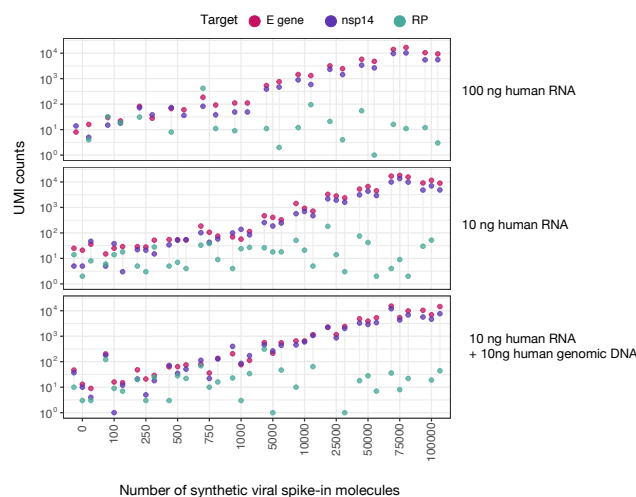

**Fig. 2. McQ quantitatively detects viral RNA on synthetic templates.** 96 samples containing defined numbers of synthetic SARS-CoV-2 RNA template (0-100,000 copies) and human RNA were processed using the McQ workflow. Scatter plots depict the number of Unique Molecular Identifiers (UMI) labeling viral targets (E gene: pink, nsp14: purple) or human control (RP: green) as a function of the number of synthetic viral RNA molecules spiked into total human RNA. Each viral spike-in amount was processed with varying amounts of human RNA mixed into the sample (100 ng RNA, 10 ng RNA, 10 ng RNA + 10 ng genomic DNA) in duplicate or triplicate. UMI counts reflect unique RNA templates present in the sample.

tude higher than the maximum of 47 observed in synthetic samples. The high background not only caused false positive sample assignment but also prevented distinction of samples with low viral load from negative samples, limiting sensitivity. We suspect that the presence of many samples with high viral load on these plates, combined with repeated usage of these samples has increased the chance of sample cross-contamination and is a major source of high background. Importantly, this issue was resolved when repeating the procedure on freshly collected samples (Figure 4). Moreover, in the Supplementary Results section we show that inclusion of an Exonuclease I step prior to sequencing lowered viral UMI counts in control samples.

A unique feature of the McQ protocol is the introduction of UMIs to correct for PCR duplicates in target quantification. We evaluated the importance of this feature by comparing the accuracy of target quantification using simple read counts (Figure 3B) and upon UMI correction (Figure 3A). While the linear correlation between Ct and counts for viral targets was observable with both metrics, the data were substantially more noisy using read counts only (Figure 3B,C). Moreover, background counts in negative samples were significantly higher with up to 1.5 million counts (Figure 3B). We conclude that UMI-based quantification is important for higher accuracy in quantification of viral load by correcting for amplification bias. These results demonstrate that McQ is able to identify positive samples and UMI counts quantitatively reflect viral load.

**Proof of concept of McQ in routine testing.** We performed a small pilot study to demonstrate the applicability of McQ for surveillance testing. Saliva samples were self-collected by 136 healthy volunteers, registered online and

dropped off at a central collection point. We performed automated RNA extraction from these samples (Supplementary File 1) and applied the McQ analysis framework. In parallel, we processed the same RNA samples with a commercially available loop-mediated isothermal amplification (LAMP) rapid colorimetric assay kit. We included several negative (water and previously tested negative swab samples) and positive controls (100,000 copies of synthetic RNA, dilutions of titrated swab samples, RNA of positive samples). RNA extraction time on the robot was about one hour per 96 well plate. The complete turnaround time was 48h. With these fresh samples, viral UMI counts for negative controls were low (between 4 and 23 counts). This argues for low levels of cross-contamination inherent in our procedure and suggests the high levels of background we observed before were a consequence of contamination already present in the RNA samples. Importantly, the viral UMI counts in positive controls were more than an order of magnitude higher than in negative controls and we could detect positive control samples with low viral load (Ct 29.56) (Figure 4A). We diagnosed all of the saliva samples as negative based on the abundance of E and nsp14 UMIs, which were at comparable levels to negative controls (1- 88 UMIs). The results were confirmed independently using LAMP (Figure 4B), yielding 100% agreement between the two approaches. Negative status of three samples with McQ or LAMP values just below the positive threshold was confirmed via qPCR.

As McQ is based on sequencing, a significant part of the costs per sample is coming from Illumina sequencing. To address the impact of sequencing depth on diagnostic accuracy we subsampled the data. With 2600 reads per sample we detected either the E or nsp14 target in all sixteen positive controls, and 15/16 with 260 reads per sample (Figure S10). This suggests that a sequencing depth of 3000 reads per sample could be sufficient to detect positive samples. Together these data demonstrate that McQ has the sensitivity and the throughput to test for presence of SARS-CoV-2 in saliva or swab samples.

## Discussion

We have developed McQ, a SARS-CoV-2 quantification assay that couples early-stage barcoding with next-generation sequencing for multiplexed processing of thousands of samples at low cost, enabling testing at the scales required for routine surveillance screening. Barcoding at the reverse transcription step enables early sample pooling to reduce hands-on time and cost. Integration of homemade enzymes and reagents circumvents potential bottlenecks due to reagent shortages and facilitates implementation of the workflow in settings with limited financial resources. We have demonstrated that McQ can detect SARS-CoV-2 RNA in extracted RNA from clinical samples. Compared with read-based quantification, the UMI-based quantification implemented in McQ enables higher accuracy in determination of viral load by correcting for amplification bias. Viral UMI counts were predictive of Ct values obtained on the same samples using a validated RT-qPCR method in a clinical diagnostic facil-

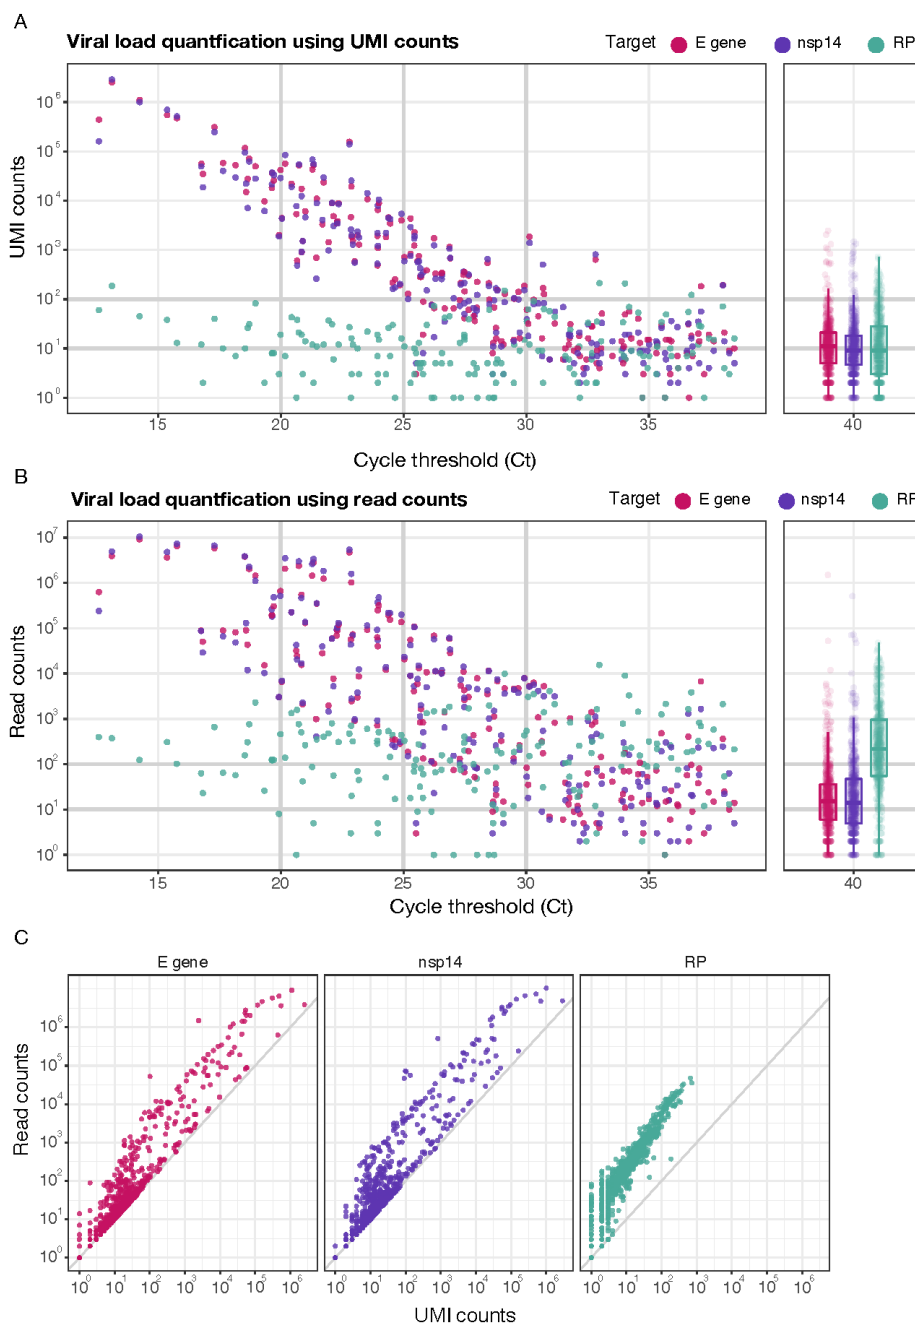

**Fig. 3. Detection of SARS-Cov-2 RNA in 838 clinical samples using McQ.** (A) Scatterplot shows a comparison of UMI counts obtained by McQ and RT-qPCR results on the same sample for 838 clinical samples distributed across 10 plates. Unique Molecular Identifiers (UMI) label viral targets (E gene: pink, nsp14: purple) or human control (RP: green). UMI count distributions for negative samples (Ct 40) are shown as boxplots. (B) Scatterplot depicting the number of reads for each target compared to the qPCR results obtained on the same sample. Read count distributions for negative samples (Ct 40) are shown as boxplots. (C) Plots show a comparison of UMI and read counts for E (pink), nsp14 (purple) and RP (green) targets in the 838 samples from A and B.

ity. Moreover, McQ accurately diagnosed samples in an integrated testing workflow entailing self-sampling and automated RNA extraction from saliva. McQ is highly modular and can easily be extended to other human or SARS-CoV-2 targets, or to multiplexed detection of several pathogens in one sample.

McQ analytical sensitivity is lower than with gold standard RT-qPCR based tests at 50 copies/ $\mu$ l, corresponding to samples with a Ct of approximately 30. Nevertheless, this may be sufficient for efficiently limiting viral spread as epi-

demiological studies have identified high testing frequency and fast turnaround times as the most critical variables for controlling transmission<sup>35,36</sup>. Sensitivity was only secondary to these factors, with little difference in preventing transmission with high ( $10^3$  cp/ml, RT-PCR) or lower sensitivity ( $10^5$  cp/ml, e.g. LAMP) tests<sup>35</sup>. In addition, samples with low viral load (Ct >30 or <50 copies/ $\mu$ l RNA) have been associated with a loss of cultivation of the virus<sup>33,34,37-40</sup> and could pose only a low risk for transmission. Combining McQ with our in-house RNA extraction workflow from saliva we were able

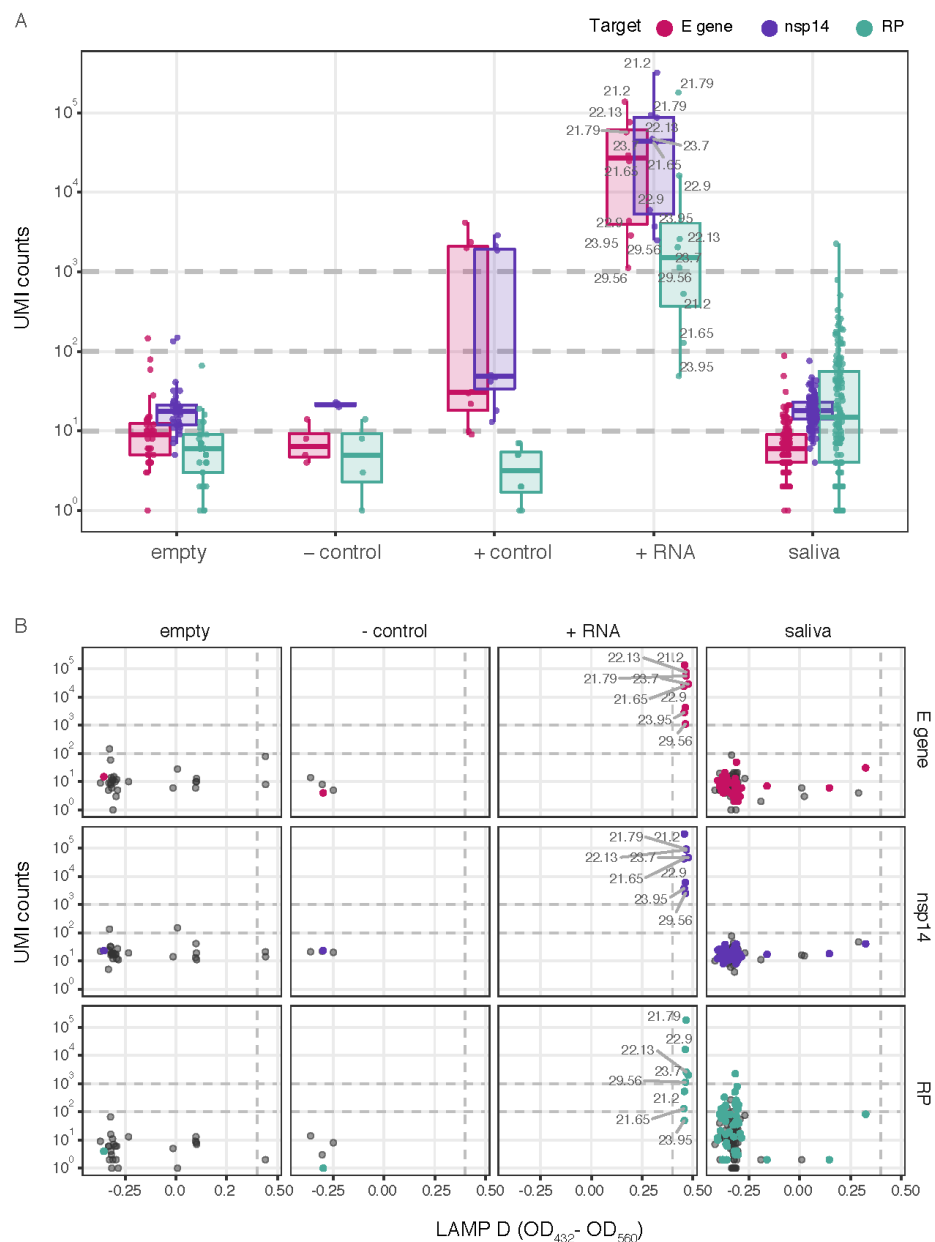

**Fig. 4. Detection of SARS-CoV-2 RNA in extracted saliva samples.** (A) Plots show the number of UMI detected for viral targets (E gene: pink, nsp14: purple) or human control (RP: green) in RNA extracted from 136 saliva samples provided by healthy volunteers (saliva). Empty = water, added before RNA extraction, negative control = saliva from a previously tested negative sample, positive control = highly diluted negative saliva sample spiked with RNA from a sample tested positive for SARS-CoV-2 and 100,000 molecules of Twist synthetic RNA (in water, spiked in prior to extraction), positive RNA = extracted RNA from samples tested positive for SARS-CoV-2 in a clinical diagnostics facility (Ct values indicated in dark grey), added to assay plates after RNA extraction. Boxplots are overlaid to visualize distributions. (B) Comparison of UMI counts for E (pink), nsp14 (purple) and RP (green) targets with D values obtained from a LAMP assay on the same samples. Black dots denote failed LAMP assays (D IC < 0.4).

to clearly distinguish positive from negative samples, with viral UMI counts at least an order of magnitude higher in positive samples even for a sample with low viral load (Ct 29.56). McQ increases testing capacity at low cost and could complement highly sensitive symptomatic testing, which on its own is not sufficient to control viral spread due to high infectivity of pre- and asymptomatic individuals<sup>5,7</sup>.

McQ is based on homemade reverse transcriptase and polymerase enzymes. We provide detailed purification protocols and recipes for non-proprietary buffers for use of our enzymes by the community. Our homemade MMLV\_mut reverse transcriptase and Pfu-Sso7d polymerase enzymes

showed comparable performance to commercial enzymes. Our in-house solutions lower reagent costs and circumvent the dependence on commercial kits that are subject to shortage when highly demanded. This will facilitate the implementation of widespread testing. Furthermore, they can be readily deployed in other testing frameworks and complement open-source solutions for one- and two-step RT-qPCR diagnostics<sup>41-44</sup>.

Reducing molecular contamination, shortening turnaround time, and investing in alternative methods for swab or saliva sample processing that are more automation friendly are key areas for improvement towards

implementation of McQ in a surveillance testing framework. In the first set of RNA samples we processed with McQ we detected high numbers of viral UMIs in a significant number of negative (Ct 40) samples, causing false positive sample assignment and limiting sensitivity by preventing distinction of samples with low viral load from negative samples. With freshly collected samples viral UMI counts for negative controls and in negative saliva samples were reduced significantly, suggesting that the high levels of background we observed before were a consequence of contamination already present in these RNA samples. Moreover, we have shown that inclusion of an Exonuclease I step prior to sequencing reduces viral UMI counts in control samples. Combining this improvement with strategies to reduce molecular contamination (according to clinical testing guidelines) should further reduce background levels of viral UMI counts. These measures will improve sensitivity, and reduce the potential for false positives that require re-testing.

## Supplemental results

**Automated paramagnetic bead-based RNA extraction from swabs and saliva.** RNA purification is a major bottleneck in scaling up testing capacity. To overcome this we implemented the [SARS-CoV-2 RNA purification protocol](#) from BOMB-Bio<sup>45</sup> on the Biomek i7 liquid-handling platform at the EMBL Genomics Core Facility. A detailed description of the automation workflow, reagents and the source code for sample processing on the Biomek i7 platform is provided in Supplementary File 1.

We first implemented bead-based extraction manually using swab samples. Nose and throat swab samples were collected in Amies transport medium from COVID-19 patients at Uni Klinikum Heidelberg, Frankfurt and Oldenburg (Methods). 200  $\mu$ l of each sample was manually transferred to a 1.2 ml deep-well plate and 100  $\mu$ l GITC lysis buffer was added. Samples were subsequently purified using 40  $\mu$ l of paramagnetic beads, washed with ethanol and resuspended in 25  $\mu$ l of MilliQ water. To evaluate extraction efficiency we performed RT-qPCR (using TaqMan Fast Virus 1-Step Master Mix, Thermo) on a subset of extracted samples (Figure S1). These included extractions of Expi293F cell suspensions ( $10^6$  cells/ml) in a 0.9% NaCl saline solution with different amounts of synthetic SARS-CoV-2 RNA template spiked-in (2.5 – 500 copies/ $\mu$ l corresponding to 500-100,000 copies total), dilution series of two swab samples previously tested positive for SARS-CoV-2 by RT-qPCR (swab 1 Ct = 16.37, swab 2 Ct = 16.61), and an undiluted SARS-CoV-2 negative swab sample (swab 3). We obtained similar Ct values for identical amounts of synthetic viral template regardless of whether it was spiked in prior to extraction or immediately prior to RT, indicating high extraction efficiency (Figure S1A). Bioanalyzer traces confirmed high RNA quality (Figure S1B). We detected viral RNA by qPCR in all swab dilutions (Figure S1C) and observed an increase in Ct with increasing dilution, as expected. RNA quality was generally lower in extracted swab samples (Figure S1D) compared to human cell control or synthetic viral RNA spiked

into Expi293F cells. The differences in quality could be due to repeated freeze-thawing of swab samples, or inhibitory effects of the swab collection medium during RNA extraction.

Having demonstrated that bead-based RNA extraction is highly efficient from manually processed swab samples, we proceeded to implement automated extraction. At this point we turned to saliva samples as sample collection is easier and can be performed by individuals, without the need for trained personnel. Saliva samples provided by healthy volunteers were collected in a 0.9% NaCl solution. Samples were inactivated in bulk by the addition of boiling water previously heated to 95°C to a 1L beaker containing all sample tubes, and incubated for 5 minutes. Water temperature was required to be >80°C after the 5 min incubation. After inactivation, 200  $\mu$ l of each sample was manually transferred to a 1.2 ml deep-well plate and 100  $\mu$ l GITC lysis buffer was added. Samples were subsequently purified using 40  $\mu$ l of paramagnetic beads, washed with ethanol and resuspended in 25  $\mu$ l of MilliQ water. RNA quality was similar to manually extracted swab samples (Figure S1E).

The complete extraction procedure can be achieved in 145-175 min /plate (~40 min for sample collection, boiling and scanning of barcodes; 60-90 min for manual transfer to 96-well plates; 45 min for robotic extraction). Automated extraction typically yielded 10 - 75 ng of RNA for saliva samples that were subsequently used for reverse transcription.

### Expression and purification of homemade enzymes.

To develop a workflow that is independent of supply-limited and expensive commercial enzymes and reagents we expressed and purified a Moloney Murine Leukemia Virus-based reverse transcriptase (MMLV\_mut) and a Pfu-Sso7d polymerase (described in detail in Supplementary File 2). Both enzymes were purified using a multi-step purification to obtain highly pure MMLV\_mut (76 kDa) and Pfu-Sso7d (98 kDa) protein. MMLV\_mut was expressed in *E. coli* BL21 (DE3) cells, with a yield of 120 mg MMLV\_mut from two litres of expression culture. Pfu-Sso7d was expressed in *E. coli* Rosetta (DE3) cells, with a yield of 17 mg Pfu-Sso7d from one litre of expression culture.

**Optimising MMLV\_mut reaction conditions.** To establish reaction conditions for homemade MMLV\_mut reverse transcriptase we performed cDNA synthesis from synthetic SARS-CoV-2 viral RNA template with the N1 primer set recommended by the CDC, and evaluated efficiency via qPCR using SYBR Green master mix (Table S1, Figure S2A). In a first attempt to test its activity we used MMLV\_mut at the suggested concentration of commercial SSIII (1  $\mu$ l of 1 mg/ml stock in 20  $\mu$ l reaction) with a buffer similar in composition to commercial SSIII buffer (Buffer V1). Following recommended reaction conditions for SSIII we obtained cycle threshold (Ct) values of 28 and 31 (for 100,000 and 10,000 spike-in molecules) after reverse transcription with MMLV\_mut, outperforming the commercial SSIII enzyme (Ct 30 and undetermined, respectively) and demonstrating MMLV\_mut was active and produced cDNA suitable for SARS-CoV-2 detection. To identify robust con-

ditions for efficient reverse transcription using homemade MMLV\_mut enzyme we extensively varied different reaction parameters (Figure S2A). We swapped the target-specific N1 reverse transcription primer for random hexamers to avoid optimizing conditions for a specific target. We found a Tris and MOPS based buffer with reduced salt concentrations and glycerol (for thermostabilisation) and a non-ionic detergent resulted in robust reverse transcription (Buffer V5, developed by Alexander Klenov<sup>46</sup>). Reverse transcription with 10x less enzyme (stock of 0.1 mg/ml) substantially improved efficiency (Ct 24.76 compared to Ct 31 with 1 mg/ml enzyme stock for 10,000 spike-in molecules). Further dilution of the enzyme stock (to 0.02 mg/ml) tended to result in decreased Ct but with considerably more variable outcomes (Figure S2A). We applied the optimized conditions (0.02 mg/ml enzyme and V5 buffer) to determine SARS-CoV-2 load in four previously tested clinical samples (kindly provided by M. Knop, ZMBH + DKFZ) and obtained very similar Ct values (Fig. S2B). The previous RT-qPCR assay was run in a clinical diagnostics facility, using a commercially available test kit that uses altered versions of the E Sarbeco<sup>30</sup> primer set and using 10 µl RNA as input, which could explain the small discrepancies. Taken together we identified robust reaction conditions for homemade MMLV\_mut reverse transcriptase compatible with efficient production of cDNA, yielding similar viral load quantification as a validated qPCR kit.

**McQ amplicon and primer design.** We designed primers targeting the E Sarbeco and nsp14 (ORF1) regions in the SARS-CoV-2 genome for next-generation sequencing based multiplexed detection. These regions were used in RT-PCR tests developed by the Charite<sup>30</sup> and HKU<sup>31</sup>, and both sets of primers resulted in high analytical efficiency and sensitivity<sup>47,48</sup>. We modified priming sequences to increase melting temperatures and ensured specificity via blast<sup>49</sup> against the human genome (hg38). To ensure primers are uniquely targeting and capable to amplify SARS-CoV-2 variants we aligned primers to a reference SARS-CoV-2 genome (NC\_045512.2) and a panel of 1775 sequenced SARS-CoV-2 strains obtained from GISAID. We based RP primer design on the sequences recommended by the CDC, for amplification of a human control target, and only modified primers to match melting temperatures of viral primers. It is important to note that while these primers can be used to ensure pool complexity at the level of sample barcodes, they cannot distinguish negative samples from failed extractions as human genomic DNA contamination would lead to the presence of RP amplicons<sup>50</sup>. Designing the RP reverse transcription primer to target another exon will address this problem. All primers were additionally checked for (self)-dimerization potential. To barcode samples at the cDNA step we incorporated 15 nucleotide sample barcodes (described in Hossain et al.<sup>25</sup>) in reverse transcription primers, to allow pooling of 96 cDNA samples into a single tube for PCR amplification. Reverse transcription primers additionally contained a N15 UMI (for viral load quantification) and a partial Illumina read1 primer sequence. This sequence serves as a common reverse primer for all three targets in the first round of

PCR amplification, and is used in the second PCR to add indexed sequencing adapters. PCR1 forward primers were correspondingly designed with a partial Illumina read 2 primer sequence in their overhangs. This setup allows the direct sequencing of amplicons and readout of sample and sequencing indexes using standard Illumina reagents and kits. Samples are sequenced in 75SE mode and demultiplexed into 96-well plates using 8nt i5 and i7 indexes. The first 15 cycles of read 1 contain the sample barcode to assign samples to plate wells, followed by 15 cycles of UMI that identify unique RNA template molecules and allow correcting for amplification bias during PCR, the target-specific priming sequence (18 to 24 nt) and 21 to 27 nt of target sequence (depending on the target) that allows distinguishing between actual reads and primer dimer. The 27 nt of human RP sequence are too short and do not contain sufficient genomic variation to identify individuals from sequencing data.

**Implementation of McQ, an NGS-based assay for multiplexed SARS-CoV-2 detection.** For initial protocol implementation we used 1 µl of the 1 mg/ml MMLV\_mut stock with buffer V1 and performed reverse transcription of defined mixtures of synthetic SARS-CoV-2 viral RNA and synthetic human liver RNA as template. To maximize Pfu-Sso7d amplification efficiency we tested amplification of the E amplicon from cDNA generated from 5000 copies of synthetic viral spike-in with four reaction buffers (HF-V2 to HF-V5, described by Alexander Klenov)<sup>51</sup> in addition to HF-V1, our customary in-house Pfu-Sso7d buffer. Two buffers, HF-V4 and HF-V5 enabled strong and specific amplification at levels similar to commercial Phusion enzyme (Figure S3A). In contrast to other buffers HF-V4 and HF-V5 contained Arginine and Trehalose, which could aid the amplification of low amounts of template. We proceeded with buffer HF-V5, which enabled reduced primer dimer formation compared to HF-V4, as evidenced by the substantially weaker primer dimer band. We determined optimal primer concentrations and viral to human primer ratios during reverse transcription and PCR1 to minimise the formation of primer dimers and favour amplification of viral targets, settling on a 2:1 ratio of viral over RP primers in both reverse transcription (200 nM and 100 nM) and PCR1 (50 nM and 25 nM). Sequencing adapters were added in PCR2 using commercial KAPA polymerase. We applied the resulting protocol to twelve samples containing defined amounts of synthetic SARS-CoV-2 spike-in molecules (10 to 100,000) mixed with 10 ng total human RNA. To address whether pooled amplification leads to sample dropout or reduces quantification accuracy we performed both PCRs on individual samples (Figure S4A) and on pooled cDNA of the twelve samples (Figure S4B), using 35 and 30 cycles in PCR1, respectively. We obtained similar UMI counts (labelling unique RNA templates) for E and nsp14 primer sets within a sample, indicating comparable sensitivity, and UMI counts between replicates showed good agreement. Viral UMI counts showed a linear increase with the amount of synthetic SARS-CoV-2 template added to samples. UMI counts for the RP amplicon were relatively similar across samples, as expected from the fixed amount of



human RNA spiked into each sample. We detected all twelve sample barcodes in individually amplified samples, as well as in the sample pool. While the total UMI counts for a given template amount were lower in the sample pool than in individually amplified samples, the linear, positive correlation of viral UMI counts with the amount of synthetic SARS-CoV-2 template added to samples was preserved (Figure S4B).

We next replaced commercial KAPA with Pfu-Sso7d in PCR2 and identified optimal buffer and annealing conditions (Figure S3B). Using cDNA from the pool of twelve samples described above we performed PCR1 with Pfu-Sso7d and compared performance of KAPA and Pfu-Sso7d in PCR2. Both polymerases yielded similar numbers of UMIs (Figure S5A). KAPA polymerase is favored in library applications due to its low GC-amplification bias compared to other polymerases. We quantified amplification bias by counting the numbers of reads per UMI and found very similar distributions for Pfu-Sso7d and KAPA, with a tendency for less variation in read numbers with Pfu-Sso7d (Figure S5B). We could not compare KAPA polymerase against Pfu-Sso7d for PCR1 as KAPA consistently produced non-specific higher molecular weight bands for the RP and nsp14 targets. As PCR1 entails more cycles than PCR2 it is possible that a larger difference in efficiency and bias between the two polymerases is masked when comparing them in the second PCR only.

**Sources of and strategies to improve incomplete UMI recovery.** E and nsp14 UMI counts in samples with synthetic SARS-CoV-2 RNA were 5 to 10-fold lower than expected based on the number of viral template added to these samples (Figure S4, S5). Individually amplified samples showed the same tendency, particularly for samples with high amounts of template added (Figure S4A). This indicates that sample pooling was not by itself the cause for reduced UMI recovery. Subsampling of reads revealed that higher sequencing depth only incrementally increased UMI numbers. Taking into account the moderate amplification bias (Figure S5B) this led us to believe that steps during library preparation, such as inefficient or biased reverse transcription and the first step of PCR, presented bottlenecks for UMI recovery. We first addressed the impact of optimizing reverse transcription. As for random hexamers, buffer V5 and a 10-fold dilution of MMLV\_mut (0.1 mg/ml stock) improved reverse transcription efficiency with McQ target-specific viral primers (Figure S6A), demonstrated by the higher number of viral UMIs detected with the diluted enzyme in buffer V5. Improved viral UMI recovery with 0.1 mg/ml compared to 1 mg/ml MMLV\_mut was more pronounced in buffer V1 than V5, suggesting that multiple interacting factors can lead to improved efficiency. The improvement in efficiency was target specific as UMI counts for RP dropped with lower enzyme concentration in both buffers. After a series of additional experiments we converged on an optimal MMLV\_mut-based reverse transcription protocol using buffer V5<sup>46</sup> with trehalose (buffer V7) and 0.1 mg/ml MMLV\_mut (see Figure S6C for comparison to buffer V1 and 1 mg/ml MMLV\_mut in RT-qPCR). We decided against using a further dilution of

MMLV\_mut (to 0.02 mg/ml stock) due to the higher variability in results (Figure S2A). We also compared MMLV\_mut to commercial SSIV enzyme (Thermo), which promises enhanced yield and performance, at different concentrations and incubation temperatures but did not observe any improvement in UMI recovery for viral targets with SSIV (Figure S6B). The RP target was amplified better with SSIV in all tested conditions.

PCR jackpotting (the selection of templates in the first round of PCR) is another well-known bottleneck in library preparation. To estimate the relative contribution of bottlenecks in reverse transcription and PCR on reduced UMI recovery, and address whether a split amplification design aimed at randomizing effects of PCR jackpotting would improve UMI recovery we amplified two pools of cDNA, each consisting of twelve samples, using four different PCR designs (Figure S7A). Each PCR design used the same pool of cDNA as input. The twelve samples contained defined amounts of synthetic SARS-CoV-2 spike-in molecules (0 to 100,000, in duplicate) mixed with 10 ng total human RNA. For pool 1 we performed reverse transcription using a modified buffer V5 and 0.1 mg/ml MMLV\_mut (optimized conditions) while pool 2 samples were reverse transcribed using the initial conditions (buffer V1 and 1 mg/ml MMLV\_mut). As the cDNA input in all four designs was the same, calculating the fraction of UMIs that are shared between the resulting samples can address whether PCR substantially biases the subset of UMIs amplified from a cDNA pool (Figure S7B). We observed reasonable overlap (44%-57%) between samples derived from the same PCR1 reaction (AA and AB, as well as BA and BB), but almost no overlap between samples deriving from separate PCR1 reactions (AA or AB to BA and BB), indicating almost entirely distinct subsets of UMIs were amplified in each PCR1. This strongly suggests PCR jackpotting as a major source limiting UMI recovery. To address whether the number of UMIs could be improved by splitting a single PCR into four reactions, randomizing PCR jackpotting, we compared the number of UMIs recovered with each design (Figure S7C). Interestingly, we observed no difference between designs for the pool of samples reverse transcribed with less optimal conditions (pool 2), but improved UMI recovery with designs using PCR splitting in one or both PCRs in the pool of samples reverse transcribed with optimized conditions (pool 1). No UMIs should be shared between pools 1 and 2 as they result from distinct reverse transcription reactions and UMI complexity is sufficiently high (N15). UMIs that are shared between pools 1 and 2 (1%-6%) therefore represent the level of contamination accrued from molecular contamination at any step after reverse transcription or from sample mis-assignment. Based on these results we suggest further optimisation of the protocol towards higher UMI recovery should address the PCR step. The split amplification design we used here can be readily implemented without further experimental optimisation, with the disadvantage of an increase in PCR sample numbers. Alternatively, evaluation of other polymerases or buffer conditions that ameliorate jackpotting, such as adding Betaine or

prolonging initial denaturation<sup>52</sup> for Pfu-Sso7d could help.

**Sources of and strategies to improve background signal.** Reads mapping to viral sequences in samples containing no SARS-CoV-2 RNA are a source of false positive test outcomes and limit sensitivity of detection assays. Non-zero background has been observed in other sequencing-based assays for SARS-CoV-2 detection<sup>23,24,53</sup>, and molecular contamination and mis-assignment of sequencing reads were identified as main underlying sources<sup>23</sup>. Leveraging the UMI information we have shown that between 1% and 6% of the UMI counts in a pool are contaminants of another pool (Figure S7B), resulting from events taking place after reverse transcription (during library amplification or sequencing). Index hopping during sequencing due to free index primers that were not used up in PCR is a major source for sample mis-assignment<sup>54–56</sup>. To specifically address contribution of this variable to the fraction of NTC UMIs (viral UMIs in samples without SARS-CoV-2) we compared the number of viral UMIs in 63 NTC samples prior to and after an additional Exonuclease I digestion step after PCR2 that removes excess index primer. The NTC samples were part of pools of 12 samples that contained 2 to 12 NTC samples. Exonuclease I treatment reduced NTC UMIs at least partially in 72% of samples, and completely eradicated NTC UMIs in 58% of samples (Figure S8). The extent of reduction was pool specific suggesting that molecular contamination prior to the reverse transcription step varied between pools. In 25% of samples the number of NTC UMIs increased, indicating additional sources of NTC UMIs during sequencing (e.g. contamination in the sequencers). These data suggest that index hopping during sequencing resulting from free-floating indexed primers accounts for a substantial fraction of background that can be reduced by including an Exonuclease I treatment step after PCR2 and prior to sequencing.

**Automation of the McQ reverse transcription step.** To further reduce hands-on time in the McQ workflow we implemented a protocol for automated reverse transcription on the Beckman i7 automation system at the EMBL Genomics Core Facility. The method can easily be implemented on any liquid-handling system, using the original manual protocol as a guideline. A detailed description and step-by-step protocol is provided in Supplementary File 3. To compare performance to manually processed samples we performed reverse transcription using 10 µl aliquots of the same 96 samples (containing varying levels of synthetic viral RNA spike-in and human input material) used for Figure 2. As for manually processed samples, we detected reads for all 96 sample barcodes (Figure S9A), and observed very good concordance between UMI counts from manually processed samples and samples processed on the i7 (Figure S9A, B). The protocol is currently implemented for parallel processing of two plates and takes approximately 106 min (20 min handling time and 86 min off-deck incubation time). It can easily be scaled as all incubation steps are performed off-deck on thermal cyclers.

## Methods

Detailed methods for automated RNA extraction are provided in Supplementary File 1, for production of home-made enzymes in Supplementary File 2 and for robotic implementation of the McQ reverse transcription step in Supplementary File 3. Supplementary File 4 provides a detailed step-by-step protocol for the entire McQ workflow (from extracted RNA to sequencing-ready library). All oligo sequences are listed in Supplementary Tables 1 and 2 and have been deposited at <http://github.com/gtca/McQ>.

**Samples used in the study.** To benchmark McQ we used pseudo-anonymized surplus RNA sample material that had been collected for clinical diagnosis of SARS-CoV-2 infection by RT-qPCR carried out by the diagnostic laboratory of Heidelberg University Hospital. Such reuse of material is in accordance with German regulations, which allow development and improvement of diagnostic assays using patient samples collected specifically to perform the testing in question. Pharyngeal swab specimens provided to us were either collected through the nose (nasopharyngeal) or the mouth (oropharyngeal), or sometimes one swab was used to collect both.

**Clinical sample handling.** Specimens were collected as nasopharyngeal and oropharyngeal flocked swabs in Amies medium (eSwab, Copan Italia). The sample collection happened as part of the routine operation of Heidelberg University Hospital and at public testing stations set up by the City of Heidelberg. Collected samples were transported in sterile containers, delivered to the diagnostic laboratory within a few hours, and then examined directly or stored at 4°C until further processing. Samples were processed in a biosafety level 2 cabinet until inactivation by heat or mixing with a lysis buffer.

**RNA isolation and RT-qPCR diagnostics for clinical samples.** The standard diagnostic pipeline of the hospital laboratory was as follows: RNA was isolated from nasopharyngeal and oropharyngeal swab specimens using QIAGEN kits (QIAGEN, Hilden, Germany); either automated on the QIASymphony (DSP Virus/Pathogen Mini Kits) or QIAcube (QIAamp Viral RNA Mini Kits) devices or manually (QIAamp Viral RNA Mini Kits). Please note that the QIAcube uses a sample volume of 140 µl and an elution volume of 100 µl, whereas the QIASymphony uses a sample volume of 200 µl and an elution volume of 115 µl. RT-qPCR for the quantification of the SARS-CoV-2 viral genome was performed using kits and reagents from TIB MOLBIO Syntheselabor, Berlin, Germany. The kits were used according to the manufacturer's instruction and contained the primer/probe sets developed based on the published Sarbeco primer set<sup>30</sup>. Per 20-µl reaction, the master mix contained 5.4 µl of RNase free water, 4.0 µl of LightCycler Multiplex RNA Virus Master (Roche, Basel, Switzerland), 0.5 µl of LightMix Modular SARS and Wuhan CoV Egene (cat. no. 53-0776-96; TIB MOLBIOL Syntheselabor GmbH, Berlin, Germany) or

LightMix Modular SARS and Wuhan CoV N gene (cat. no. 53-0775-96; TIB MOLBIOL), 0.5  $\mu$ l of LightMix Modular EAV RNA Extraction Control (cat. no. 66-0909-96; TIB MOLBIOL), and 0.1  $\mu$ l of reverse transcriptase enzyme (LightCycler Multiplex RNA Virus Master, Roche, Basel, Switzerland). The master mix (10  $\mu$ l) was distributed per reaction into 96-well plates, and 10  $\mu$ l of purified RNA was added per well. The performance of the RT-qPCR was validated using a positive control for the E gene. A total of 1000 molecules of E gene RNA per RT-qPCR reaction correspond to a CT 30.

**Optimisation of MMLV\_mut reaction conditions using the N1 primer set.** To test homemade MMLV\_mut synthetic RNA template (Twist Biosciences, spike-in 1 or 2) was used in the indicated amounts. To each reverse transcription (RT) reaction we added 1  $\mu$ l 10mM dNTPs, 1 $\mu$ l 2 $\mu$ M gene-specific primer or 50 ng random hexamers (Thermo) in a total volume of 13 $\mu$ l. Following a 5 minute incubation at 65°C reactions were placed on ice.

The indicated homemade RT buffer, 1 $\mu$ l 10mM DTT and 1  $\mu$ l MMLV\_mut (at the indicated stock concentration, diluted from 2 mg/ml stock using MMLV\_mut dilution buffer) were added as a master mix and cDNA synthesis was performed at 55°C (for target specific RT primer) or 50°C (for random hexamers) for 30 to 60 min (see Table S1) followed by 15 min inactivation at 70°C. Buffer recipes are provided in Supplementary File 2. For determination of RT efficiency, SYBR green PCR master mix (Thermo) was used according to the manufacturer's protocol with primers at 100 nM. Nuclease free water was used as a non- template control. Reactions were run on an ABI flex with default SYBR green cycling conditions.

**McQ reverse transcription, cleanup and PCR amplification.** A detailed step-by-step protocol is provided in Supplementary File 4. 10  $\mu$ l of sample (either 10  $\mu$ l extracted RNA or a mixture of indicated amounts of Twist synthetic viral RNA and total human RNA filled up with nuclease-free water) was used as input to reverse transcription. Mixtures of the three indexed primers and dNTPs were prepared in a 96-well format index master plate as described in Supplementary File 4. The final primer concentrations in reverse transcription reactions were 200 nM for E and nsp14, and 100 nM for RP. Primers, dNTPs and template were incubated at 65°C for 5 min, and immediately placed on ice to cool down for 1 min prior to addition of the enzyme master mix containing MMLV\_mut at the indicated concentration (1  $\mu$ l of indicated stock in a total of 20  $\mu$ l reaction), the respective buffer, DTT, and RNase inhibitor (Takara Bio). Reverse transcription was run in a thermocycler (55°C 30 min, 70°C 10 min). Samples were then incubated with thermolabile Exonuclease I (NEB) (37°C 30 min, 85°C 5 min) to digest excess barcoded RT primer. For manually processed samples, samples were processed in 96-well format using multichannel pipettes. For reverse transcription on the Biomek i7 we prepared the index plate as described in Supplementary File 4. RT enzyme and Exonuclease I master mixes were prepared in four 1.5 ml Lo-

bind Eppendorf tubes as described in Supplementary Files 3 and 4. The procedure after ExoI digest was the same for manually and robotically processed samples. All samples from a plate (up to 96) were pooled using a multichannel pipette. 10  $\mu$ l of each well were transferred into 8-well PCR strips, and combined into 1.5 ml Lo-bind Eppendorf tubes and mixed well. Samples were purified using 1X SPRI beads (Beckman Coulter Life Sciences) according to manufacturer's instructions, and eluted in a total volume of 30  $\mu$ l of nuclease-free water (NFW). To avoid sample loss due to elution in a small volume of NFW relative to beads we used only 30  $\mu$ l of beads for cleanup and added 930  $\mu$ l of SPRI buffer only (for a total volume of 1X); see Supplementary File 4 for details. 29  $\mu$ l of the cleaned, indexed cDNA pool was used as template for multiplexed amplification with two virus-specific forward primers (E and nsp14, 50 nM each), human RP-specific forward primer (25 nM), and a common reverse primer binding to the constant sequence added with the RT primer (125 nM). Each pool was amplified for 30 cycles with homemade Pfu-Sso7d (0.07 mg/ml) and buffer HF-V5. The master mix and samples were kept on ice at all times during the sample preparation, and reactions transferred directly to the pre-warmed PCR block (98°C). The following cycling conditions were used: 98°C 30 sec; [98°C 10 sec, 62°C 20 sec, 72°C 20 sec] X 30 cycles; 72°C 5 min. PCR products were then cleaned using 1.8 volumes of SPRI magnetic beads (Beckman Coulter, Life Sciences) according to manufacturer's instructions, and eluted in 15  $\mu$ l of nuclease-free water (see Supplementary File 4 for detailed procedure).

Sequencing adapters and sample indexes were added in PCR2, using 3  $\mu$ l of cleaned PCR1 product as input. Indexed Illumina P5 and P7 primers were used at 400  $\mu$ M each, using unique i5-i7 index pairs for each 96-well plate pool. Each pool was amplified for 10 cycles with homemade Pfu-Sso7d (0.07 mg/ml) and buffer HF-V5. The master mix and samples were kept on ice at all times during the sample preparation, and samples transferred directly to the pre-warmed PCR block (98°C). The following cycling conditions were used: 98°C 2 min; [98°C 10 sec, 62°C 30 sec, 72°C 15 sec] X 10 cycles; 72°C 2 min. Libraries were cleaned using 1 volume of SPRI magnetic beads (Beckman Coulter, Life Sciences) according to manufacturer's instructions and eluted in 15  $\mu$ l of nuclease-free water. Sample concentrations were determined using Qubit high-sensitivity DNA assay, and quality confirmed on an Agilent high-sensitivity Bioanalyzer chip. Samples were pooled equally (according to pool size and concentration) for sequencing. We amplified samples individually for data in Supplementary Figures S3, S4 (upper panel), and S6. Procedure was the same as for 96-well pooled amplification, except that samples were cleaned up individually after RT, eluted in 7  $\mu$ l NFW, which was used as input for PCR1 with 35 cycles. The entire cleaned PCR1 reaction was used as input for PCR2. We processed samples in pools of 12 for Supplementary Figures S4, S7 and S8. To this end 10  $\mu$ l of each well was pooled, cleaned with 1X SPRI beads, and eluted in 40  $\mu$ l of NFW. Half of the cDNA pool was used as template for PCR1, which was run identically as for the 96-

well pools. PCR1 products were cleaned using 1.8X SPRI beads and eluted in 12  $\mu$ l NFW. Half of the cleaned PCR1 product was used as template for PCR2.

**Exonuclease I digest to remove excess indexed P5 and P7 primers.** To reduce contamination during sequencing caused by leftover indexed primers, the PCR2 products were optionally treated with thermolabile Exonuclease I (NEB) for 30 min at 37°C followed by 5 min at 85°C.

**SARS-CoV-2 detection in saliva samples.** Healthy volunteers collected and registered their own samples and dropped them off at a central collection point. Volunteers were provided with a self-testing kit consisting of a 50 ml falcon tube containing 5 ml of 0.9% saline (0.9% NaCl solution, sterile), a barcoded 2 ml tube with screw lid and a disposable pipette inside a plastic bag. The set further contained an information sheet containing the code of the test set and a link to an instruction video for correct sample collection. Volunteers used the saline solution for deep-throat gargling (30 sec) for sample collection, which was spit back into the Falcon tube. The Falcon tube was shaken vigorously and 1-1.5 ml of the mixture was transferred into the 2 ml tube using the plastic disposable pipette. Volunteers were instructed to collect samples before breakfast or brushing their teeth, on the same morning the RNA was extracted. Volunteers dropped their 2 ml sample tube at the established collection points before 9:30am. Sample inactivation proceeded as described above in a safety Level S2 laboratory. For transfer to 96-well plates, samples were processed in a laminar flow hood. The plate was then sealed with a foil and placed on the robot for RNA extraction. RNA extraction and library preparation were performed as described above, with the following deviations: We included an additional 2.2X SPRI cleanup step after RNA extraction, samples were incubated with ExoI after PCR2 to digest excess indexed primer, reverse transcription was performed with commercial SSIII and we used commercial NEB Phusion ready mix in PCR2. Saliva samples were distributed into two 96-well plates, along with positive and negative controls. Positive controls were added to each plate at the same location, and included a highly diluted negative saliva sample spiked with RNA from a sample tested positive for SARS-CoV-2 (spiked into two wells), 100,000 molecules of Twist synthetic RNA (in water, spiked into two wells prior to extraction) both plotted as positive control, and extracted RNA from four samples tested positive for SARS-CoV-2 (added after RNA extraction) plotted as positive sample. We included two kinds of negative controls: Empty wells (water added before RNA extraction), to measure background contamination, and saliva from a previously tested negative sample (spiked into two wells). An index master mix plate was prepared in a PCR hood after UV exposure from newly ordered oligos and in a room where no SARS-CoV-2 related reagents had been handled. For comparison we processed 1  $\mu$ l RNA from each sample with the SARS-CoV-2 Rapid Colorimetric LAMP Assay kit (NEB) following manufacturers instructions except that reaction volumes were halved and reactions performed in 96-well format. LAMP delta OD value

(D) was calculated as the difference between absorbance at 432 nM and 560 nM ( $D = OD_{432} - OD_{560}$ ). The kit included actin as internal control (IC), and samples with IC D values of  $<0.4$  were classified as failed. The LAMP primer mix contained primers targeting the E and N gene for viral detection, and samples with  $D > 0.4$  were considered positive. Samples tested via qPCR (using 2  $\mu$ l RNA as input) were processed using TaqMan Fast Virus 1-step Master mix, which uses the N1 primer set.

**Data processing.** Demultiplexed FASTQ files were processed using `umi_tools`<sup>57</sup> (`umi_tools extract`) to only preserve reads with expected sample well barcodes (maximum 96). Reads were mapped to the three expected amplicon sequences with `bwa`<sup>58</sup> (`bwa mem`). Sorted BAM files were filtered to remove primer dimer reads and potential other noise. The number of UMIs as well as the number of reads per UMI was counted and merged for all the samples for downstream analysis. For downsampled data, we sampled a fraction of reads per plate at random with `samtools`<sup>59</sup> command `samtools view -s`. Using the EMBL cluster (run on Intel Xeon Gold 6136 CPU and 32 Gb of RAM), this pipeline allows generating count matrices in under 10 minutes for a sequencing run. Exact running time depends on available hardware and sequencing depth. For instance, while it takes about eight minutes for a single plate (FASTQ file) with 15 million reads to be processed, analysis time is reduced to 9 seconds when reads are downsampled to 15,000. Downstream analysis of count tables was performed with the R programming language<sup>60</sup> using `tidyverse`<sup>61</sup> for data handling and `ggplot2`<sup>62</sup> for visualization. Scripts for processing of sequencing data have been deposited at <http://github.com/gtca/McQ>.

## Acknowledgements

The construct encoding the MMLV\_mut reverse transcriptase was a kind gift from Dr. Louise Walport and Dr. Svend Kjaer (Francis Crick Institute, London). We thank Alexander Aulehla for contributing to the overall design of the study, the management of early positive sample access and support in the implementation of routine testing at EMBL. D.B., M.F. and J. K. were supported by the EMBL International PhD program. D.B. was supported by a Darwin Trust fellowship. We are grateful to Alessandra Reversi and Sandra Clauder for project management to implement saliva testing at EMBL. We would like to thank the team of EMBL volunteers for pipetting samples for routine saliva testing at EMBL. We thank Simon Anders, the Genome Biology Computational Support team, Jan Provaznik, Jonathan Landry and Tobias Rausch for computational support for sample management. Research in the laboratory of A.R.K and L.S. was supported by core funding of the European Molecular Biology Laboratory. M.K. and H.G.K received funding through a research grant from the state of Baden-Württemberg (MWK).

## Author contributions

A.R.K., V.B., K.R., and A.T. conceived and coordinated the overall project. S.C.V conceived, designed and was responsible for coordination and implementation of the McQ NGS-based multiplexing approach. S.C.V. and J.K. performed experiments to establish and benchmark the McQ workflow. D.B. developed computational analysis pipelines to generate UMI count tables from McQ sequencing data, and D.B. and M.F. analysed data. S.C.V and A.R.K. advised analysis of McQ data. V.B. coordinated and performed sequencing of McQ data. V.B. and E.C. designed and coordinated implementation of automated RNA extraction. E.C., M.O, F.J. and J.Z. performed experiments to establish automated RNA extraction. K.R. coordinated production of homemade enzymes, and J.F. and N.D. expressed and purified homemade enzymes. N.D. advised optimization of reaction conditions with homemade enzymes and provided buffers. V.B. coordinated optimization of MMLV\_mut reaction conditions. R.K., L.V. and K.M. designed and performed experiments to optimize reaction conditions for MMLV\_mut reverse transcriptase. F.J. implemented automation of the McQ reverse transcription step on the Biomek i7 platform. L.V., F.J. and M.O. processed saliva samples for Figure 4. H.G.K collected and characterised RNA of clinical samples for establishing McQ. S.G. and A.H. collected and provided clinical swab samples for establishing bead-based RNA extraction. M.K. characterised samples used for benchmarking McQ. A.R.K., V.B. K.R. A.T. and L. M. S. advised the study. S.C.V., D.B. and A.R.K. wrote the manuscript. All authors read, edited and approved the final manuscript. The authors declare no conflict of interest.

## References

1. Coronavirus cases worldwide by country. <https://www.statista.com/statistics/1043366/novel-coronavirus-2019ncov-cases-worldwide-by-country/>, 2020. Library Catalog: [www.statista.com](http://www.statista.com).
2. Jussi Taipale, Paul Romer, and Sten Linnarsson. Population-scale testing can suppress the spread of COVID-19. preprint, *Epidemiology*, May 2020.
3. Robert F. Service. Fast, cheap tests could enable safer reopening. *Science*, 369(6504):608, August 2020. doi: 10.1126/science.369.6504.608.
4. Monica Gandhi, Deborah S. Yokoe, and Diane V. Havlir. Asymptomatic Transmission, the Achilles' Heel of Current Strategies to Control Covid-19. *New England Journal of Medicine*, 382(22):2158–2160, May 2020. ISSN 0028-4793, 1533-4406. doi: 10.1056/NEJMc2009758.
5. Seyed M. Moghadas, Meagan C. Fitzpatrick, Pratha Sah, Abhishek Pandey, Affan Shoukat, Burton H. Singer, and Alison P. Galvani. The implications of silent transmission for the control of COVID-19 outbreaks. *Proceedings of the National Academy of Sciences*, 117(30):17513–17515, July 2020. ISSN 0027-8424, 1091-6490. doi: 10.1073/pnas.2008373117.
6. Kendra Quicke, Emily Gallichote, Nicole Sexton, Michael Young, Ashley Janich, Gregory Gahm, Elizabeth J Carlton, Nicole Ehrhart, and Gregory D Ebel. Longitudinal Surveillance for SARS-CoV-2 RNA Among Asymptomatic Staff in Five Colorado Skilled Nursing Facilities: Epidemiologic, Virologic and Sequence Analysis. preprint, *Infectious Diseases (except HIV/AIDS)*, June 2020.
7. Xi He, Eric H. Y. Lau, Peng Wu, Xilong Deng, Jian Wang, Xinxin Hao, Yiu Chung Lau, Jessica Y. Wong, Yujuan Guan, Xinghua Tan, Xiaoneng Mo, Yanqing Chen, Baolin Liao, Weillie Chen, Fengyu Hu, Qing Zhang, Mingqiu Zhong, Yanrong Wu, Lingzhai Zhao, Fuchun Zhang, Benjamin J. Cowling, Fang Li, and Gabriel M. Leung. Temporal dynamics in viral shedding and transmissibility of COVID-19. *Nature Medicine*, 26(5):672–675, May 2020. ISSN 1078-8956, 1546-170X. doi: 10.1038/s41591-020-0869-5.
8. Oyungerel Byambasuren, Magnolia Cardona, Katy Bell, Justin Clark, Mary-Louise McLaws, and Paul Glasziou. Estimating the extent of asymptomatic COVID-19 and its potential for community transmission: Systematic review and meta-analysis. *Official Journal of the Association of Medical Microbiology and Infectious Disease Canada*, COVID-19:Accepted versio, October 2020. ISSN 2371-0888. doi: 10.3138/jammi-2020-0030.
9. Meagan N. Esbin, Oscar N. Whitney, Shasha Chong, Anna Maurer, Xavier Darzacq, and Robert Tjian. Overcoming the bottleneck to widespread testing: a rapid review of nucleic acid testing approaches for COVID-19 detection. *RNA*, 26(7):771–783, July 2020. ISSN 1355-8382, 1469-9001. doi: 10.1261/ma.076232.120.
10. Bo Diao, Kun Wen, Jian Chen, Yueping Liu, Zilin Yuan, Chao Han, Jiahui Chen, Yuxian Pan, Li Chen, Yunjie Dan, Jing Wang, Yongwen Chen, Guohong Deng, Hongwei Zhou, and Yuzhang Wu. Diagnosis of Acute Respiratory Syndrome Coronavirus 2 Infection by Detection of Nucleocapsid Protein. preprint, *Epidemiology*, March 2020.
11. Jacqueline Dinnes, Jonathan J Deeks, Ada Adriano, Sarah Berhane, Clare Davenport, Sabine Dittich, Devy Emperador, Yemisi Takwoingi, Jane Cunningham, Sophie Beese, et al. Rapid, point-of-care antigen and molecular-based tests for diagnosis of sars-cov-2 infection. *Cochrane Database of Systematic Reviews*, (8), 2020.
12. L.J. Krüger, M. Gaeddert, L. Köppel, L. E. Brümmer, C. Gottschalk, I.B. Miranda, P. Schnitzler, H.G. Kräusslich, A.K. Lindner, O. Nikolai, F.P. Mockenhaupt, J. Seybold, V.M. Corman, C. Drosten, N.R. Pollock, A.I. Cubas-Atienzar, K. Votogianni, A. Collins, A. H. Wright, B. Knorr, A. Welker, M. de Vos, J.A. Sacks, E.R. Adams, C.M. Denkinger, and for the study team. Evaluation of the accuracy, ease of use and limit of detection of novel, rapid, antigen-detecting point-of-care diagnostics for SARS-CoV-2. preprint, *Infectious Diseases (except HIV/AIDS)*, October 2020.
13. Gannon CK Mak, Peter KC Cheng, Stephen SY Lau, Kitty KY Wong, Cs Lau, Edman TK Lam, Rickjason CW Chan, and Dominic NC Tsang. Evaluation of rapid antigen test for detection of SARS-CoV-2 virus. *Journal of Clinical Virology*, 129:104500, August 2020. ISSN 13866532. doi: 10.1016/j.jcv.2020.104500.
14. Lin Yu, Shanshan Wu, Xiaowen Hao, Xue Dong, Lingling Mao, Vincent Pelechano, Wei-Hua Chen, and Xiushan Yin. Rapid Detection of COVID-19 Coronavirus Using a Reverse Transcriptional Loop-Mediated Isothermal Amplification (RT-LAMP) Diagnostic Platform. *Clinical Chemistry*, 66(7):975–977, July 2020. ISSN 0009-9147, 1530-8561. doi: 10.1093/clinchem/hvaa102.
15. Viet Loan Dao Thi, Konrad Herbst, Kathleen Boerner, Matthias Meurer, Lukas PM Kremer, Daniel Kirrmaier, Andrew Freistaedter, Dimitrios Papagiannidis, Carla Galmozzi, Megan L. Stanifer, Steeve Boulant, Steffen Klein, Petr Chlanda, Dina Khalid, Isabel Barreto Miranda, Paul Schnitzler, Hans-Georg Kräusslich, Michael Knop, and Simon Anders. A colorimetric RT-LAMP assay and LAMP-sequencing for detecting SARS-CoV-2 RNA in clinical samples. *Science Translational Medicine*, 12(556):eabc7075, August 2020. ISSN 1946-6234, 1946-6242. doi: 10.1126/scitranslmed.abc7075.
16. Max J. Kellner, James J. Ross, Jakob Schnabl, Marcus P.S. Dekens, Robert Heinen, Irina Grishkovskaya, Benedikt Bauer, Johannes Stadlmann, Luis Menéndez-Arias, Robert Fritsche-Polanz, Marianna Traugott, Tamara Seitz, Alexander Zoufaly, Manuela Födinger, Christoph Wenisch, Johannes Zuber, Vienna Covid-19 Diagnostics Initiative (VCDI), Andrea Pauli, and Julius Brennecke. A rapid, highly sensitive and open-access SARS-CoV-2 detection assay for laboratory and home testing. preprint, *Molecular Biology*, June 2020.
17. Mohamed El-Tholoth, Haim H. Bau, and Jinzhao Song. A Single and Two-Stage, Closed-Tube, Molecular Test for the 2019 Novel Coronavirus (COVID-19) at Home, Clinic, and Points of Entry.

- preprint, February 2020.
18. Sanchita Bhadra, Timothy E. Riedel, Simren Lakhota, Nicholas D. Tran, and Andrew D. Ellington. High-surety isothermal amplification and detection of SARS-CoV-2, including with crude enzymes. preprint, *Molecular Biology*, April 2020.
  19. Xiong Ding, Kun Yin, Ziyue Li, and Changchun Liu. All-in-One Dual CRISPR-Cas12a (AIOD-CRISPR) Assay: A Case for Rapid, Ultra-sensitive and Visual Detection of Novel Coronavirus SARS-CoV-2 and HIV virus. preprint, *Biochemistry*, March 2020.
  20. James P. Broughton, Xianding Deng, Guixia Yu, Clare L. Fasching, Venice Servellita, Jasmeet Singh, Xin Miao, Jessica A. Streithorst, Andrea Granados, Alicia Sotomayor-Gonzalez, Kelsey Zorn, Allan Gopez, Elaine Hsu, Wei Gu, Steve Miller, Chao-Yang Pan, Hugo Guevara, Debra A. Wadford, Janice S. Chen, and Charles Y. Chiu. CRISPR-Cas12-based detection of SARS-CoV-2. *Nature Biotechnology*, 38(7):870–874, July 2020. ISSN 1087-0156, 1546-1696. doi: 10.1038/s41587-020-0513-4.
  21. Julia Joung, Alim Ladha, Makoto Saito, Michael Segel, Robert Bruneau, Meei-Li W. Huang, Nam-Gyun Kim, Xu Yu, Jonathan Li, Bruce D. Walker, Alexander L. Greninger, Keith R. Jerome, Jonathan S. Gootenberg, Omar O. Abudayyeh, and Feng Zhang. Point-of-care testing for COVID-19 using SHERLOCK diagnostics. *medRxiv: The Preprint Server for Health Sciences*, May 2020. doi: 10.1101/2020.05.04.20091231.
  22. Lu Guo, Xuehan Sun, Xinge Wang, Chen Liang, Haiping Jiang, Qingqin Gao, Moyu Dai, Bin Qu, Sen Fang, Yihuan Mao, Yangcan Chen, Guihai Feng, Qi Gu, Liu Wang, Ruiqi Rachel Wang, Qi Zhou, and Wei Li. SARS-CoV-2 detection with CRISPR diagnostics. preprint, *Molecular Biology*, April 2020.
  23. Joshua S. Bloom, Eric M. Jones, Molly Gasperini, Nathan B. Lubock, Laila Sathe, Chetan Munugala, A. Sina Boeshaghi, Oliver F. Brandenberg, Longhua Guo, James Boocock, Scott W. Simpkins, Isabella Lin, Nathan LaPierre, Duke Hong, Yi Zhang, Gabriel Oland, Bianca Judy Choe, Sukantha Chandrasekaran, Evann E. Hilt, Manish J. Butte, Robert Damoiseaux, Aaron R. Cooper, Yi Yin, Lior Pachter, Omai B. Garner, Jonathan Flint, Eleazar Eskin, Chongyuan Luo, Sriram Kosuri, Leonid Kruglyak, and Valerie A. Arboleda. Swab-Seq: A high-throughput platform for massively scaled up SARS-CoV-2 testing. preprint, *Infectious Diseases (except HIV/AIDS)*, August 2020.
  24. Emilio Yángüez, Griffin White, Susanne Kreutzer, Lennart Opitz, Lucy Poveda, Timothy Sykes, Maria Domenica Moccia, Catharine Aquino, and Ralph Schlapbach. HiDRA-seq: High-Throughput SARS-CoV-2 Detection by RNA Barcoding and Amplicon Sequencing. preprint, *Genomics*, June 2020.
  25. Ayaan Hossain, Alexander C. Reis, Sarthok Rahman, and Howard M. Salis. A Massively Parallel COVID-19 Diagnostic Assay for Simultaneous Testing of 19200 Patient Samples. [docs.google.com](https://docs.google.com), 2020.
  26. Jonathan L. Schmid-Burgk, Ricarda M. Schmithausen, David Li, Ronja Hollstein, Amir Ben-Shmuel, Ofir Israeli, Shay Weiss, Nir Paran, Gero Wilbring, Jana Liebing, David Feldman, Mikolaj Stabicki, Bärbel Lippke, Esther Sib, Jacob Borrajo, Jonathan Strecker, Julia Reinhardt, Per Hoffmann, Brian Cleary, Michael Hölzel, Markus M. Nöthen, Martin Exner, Kerstin U. Ludwig, Aviv Regev, and Feng Zhang. LAMP-Seq: Population-Scale COVID-19 Diagnostics Using Combinatorial Barcoding. preprint, *Molecular Biology*, April 2020.
  27. Brian Glenn St Hilaire, Neva C. Durand, Namita Mitra, Saul Godinez Pulido, Ragini Mahajan, Alyssa Blackburn, Zane L. Colaric, Joshua W. M. Theisen, David Weisz, Olga Dudchenko, Andreas Gnirke, Suhas S.P. Rao, Parwinder Kaur, Erez Lieberman Aiden, and Aviva Presser Aiden. A rapid, low cost, and highly sensitive SARS-CoV-2 diagnostic based on whole genome sequencing. preprint, *Genomics*, April 2020.
  28. Ming Wang, Aisi Fu, Ben Hu, Yongqing Tong, Ran Liu, Jiashuang Gu, Jianghao Liu, Wen Jiang, Gaigai Shen, Wanxu Zhao, Dong Men, Lilei Yu, Zixin Deng, Yan Li, and Tiangang Liu. Nanopore target sequencing for accurate and comprehensive detection of SARS-CoV-2 and other respiratory viruses. preprint, *Infectious Diseases (except HIV/AIDS)*, March 2020.
  29. Ramesh Yelagandula, Aleksandr Bykov, Alexander Vogt, Robert Heinen, Ezgi Özkan, Marcus Martin Strobl, Juliane Christina Baar, Kristina Uzunova, Bence Hajdusits, Darja Kordic, Erna Suljic, Amina Kurtovic-Kozaric, Sebija Izetbegovic, Justine Schaefer, Peter Hufnagl, Alexander Zoufaly, Tamara Seitz, VCDI, Manuela Födinger, Franz Allerberger, Alexander Stark, Luisa Cochella, and Ulrich Elling. SARSseq, a robust and highly multiplexed NGS assay for parallel detection of SARS-CoV2 and other respiratory infections. preprint, *Public and Global Health*, November 2020.
  30. Victor M Corman, Olfert Landt, Marco Kaiser, Richard Molenkamp, Adam Meijer, Daniel KW Chu, Tobias Bleicker, Sebastian Brünink, Julia Schneider, Marie Luisa Schmidt, Daphne GJC Mulders, Bart L Haagmans, Bas van der Veer, Sharon van den Brink, Lisa Wijsman, Gabriel Goderski, Jean-Louis Romette, Joanna Ellis, Maria Zambon, Malik Peiris, Herman Goossens, Chantal Reusken, Marion PG Koopmans, and Christian Drosten. Detection of 2019 novel coronavirus (2019-nCoV) by real-time RT-PCR. *Eurosurveillance*, 25(3), January 2020. ISSN 1560-7917. doi: 10.2807/1560-7917.ES.2020.25.3.2000045.
  31. Daniel K W Chu, Yang Pan, Samuel M S Cheng, Kenrie P Y Hui, Pavithra Krishnan, Yingzhi Liu, Daisy Y M Ng, Carrie K C Wan, Peng Yang, Quanyi Wang, Malik Peiris, and Leo L M Poon. Molecular Diagnosis of a Novel Coronavirus (2019-nCoV) Causing an Outbreak of Pneumonia. *Clinical Chemistry*, 66(4):549–555, April 2020. ISSN 0009-9147, 1530-8561. doi: 10.1093/clinchem/hvaa029.
  32. CDC. CDC 2019-Novel Coronavirus (2019-nCoV) Real-Time RT-PCR Diagnostic Panel. [fda.gov](https://www.fda.gov), 2020.
  33. RKI - Coronavirus SARS-CoV-2 - COVID-19: Entlassungskriterien aus der Isolierung. [rki.de](https://www.rki.de), 2020.
  34. RKI - Coronavirus SARS-CoV-2 - Hinweise zur Testung von Patienten auf Infektion mit dem neuartigen Coronavirus SARS-CoV-2. [rki.de](https://www.rki.de), 2020.
  35. Daniel B Larremore, Bryan Wilder, Evan Lester, Soraya Shehata, James M Burke, James A Hay, Milind Tambe, Michael J Mina, and Roy Parker. Test sensitivity is secondary to frequency and turnaround time for COVID-19 surveillance. preprint, *Infectious Diseases (except HIV/AIDS)*, June 2020.
  36. A. David Paltiel, Amy Zheng, and Rochelle P. Walensky. Assessment of SARS-CoV-2 Screening Strategies to Permit the Safe Reopening of College Campuses in the United States. *JAMA network open*, 3(7):e2016818, 2020. ISSN 2574-3805. doi: 10.1001/jamanetworkopen.2020.16818.
  37. Roman Wölfel, Victor M. Corman, Wolfgang Guggemos, Michael Seilmaier, Sabine Zange, Marcel A. Müller, Daniela Niemeyer, Terry C. Jones, Patrick Vollmar, Camilla Rothe, Michael Hoelscher, Tobias Bleicker, Sebastian Brünink, Julia Schneider, Rosina Ehmann, Katrin Zwirgmaier, Christian Drosten, and Clemens Wendtner. Virological assessment of hospitalized patients with COVID-2019. *Nature*, 581(7809):465–469, May 2020. ISSN 0028-0836, 1476-4687. doi: 10.1038/s41586-020-2196-x.
  38. Melissa M. Arons, Kelly M. Hatfield, Sujana C. Reddy, Anne Kimball, Allison James, Jessica R. Jacobs, Joanne Taylor, Kevin Spicer, Ana C. Bardossy, Lisa P. Oakley, Sukarma Tanwar, Jonathan W. Dyal, Josh Harney, Zeshan Chisty, Jeneita M. Bell, Mark Methner, Prabasaj Paul, Christina M. Carlson, Heather P. McLaughlin, Natalie Thornburg, Suxiang Tong, Azaibi Tamin, Ying Tao, Anna Uehara, Jennifer Harcourt, Shauna Clark, Claire Brostrom-Smith, Libby C. Page, Meagan Kay, James Lewis, Patty Montgomery, Nimalie D. Stone, Thomas A. Clark, Margaret A. Honein, Jeffrey S. Duchin, and John A. Jernigan. Presymptomatic SARS-CoV-2 Infections and Transmission in a Skilled Nursing Facility. *New England Journal of Medicine*, 382(22):2081–2090, May 2020. ISSN 0028-4793, 1533-4406. doi: 10.1056/NEJMoa2008457.
  39. Jared Bullard, Kerry Dust, Duane Funk, James E. Strong, David Alexander, Lauren Garnett, Carl Boodman, Alexander Bello, Adam Hedley, Zachary Schiffman, Kaylie Doan, Nathalie Bastien, Yan Li, Paul G. Van Caesele, and Guillaume Poliquin. Predicting infectious SARS-CoV-2 from diagnostic samples. *Clinical Infectious Diseases*:

- An Official Publication of the Infectious Diseases Society of America*, May 2020. ISSN 1537-6591. doi: 10.1093/cid/ciaa638.
40. COVID-19 Investigation Team. Clinical and virologic characteristics of the first 12 patients with coronavirus disease 2019 (COVID-19) in the United States. *Nature Medicine*, 26(6):861–868, 2020. ISSN 1546-170X. doi: 10.1038/s41591-020-0877-5.
  41. Thomas G.W. Graham, Claire Dugast-Darzacq, Gina M. Dailey, Xammy Huu Nguyenla, Erik Van Dis, Meagan N. Esbin, Abrar Abidi, Sarah A Stanley, Xavier Darzacq, and Robert Tjian. Inexpensive, versatile and open-source methods for SARS-CoV-2 detection. preprint, *Infectious Diseases (except HIV/AIDS)*, September 2020.
  42. Sanchita Bhadra, Andre C. Maranhao, and Andrew D. Ellington. A one-enzyme RT-qPCR assay for SARS-CoV-2, and procedures for reagent production. preprint, *Molecular Biology*, March 2020.
  43. Samantha J. Mascuch, Sara Fakhretaha-Aval, Jessica C. Bowman, Minh Thu H. Ma, Gwendell Thomas, Bettina Bommarius, Chieri Ito, Liangjun Zhao, Gary P. Newnam, Kavita R. Matange, Hem R. Thapa, Brett Barlow, Rebecca K. Donegan, Nguyet A. Nguyen, Emily G. Saccuzzo, Chiamaka T. Obianyor, Suneesh C. Karunakaran, Pamela Pollet, Brooke Rothschild-Mancinelli, Santi Mestre-Fos, Rebecca Guth-Metzler, Anton V. Bryksin, Anton S. Petrov, Mallory Hazell, Carolyn B. Ibberson, Petar I. Penev, Robert G. Mannino, Wilbur A. Lam, Andrés J. Garcia, Julia Kubanek, Vinayak Agarwal, Nicholas V. Hud, Jennifer B. Glass, Loren Dean Williams, and Raquel L. Lieberman. A blueprint for academic laboratories to produce SARS-CoV-2 quantitative RT-PCR test kits. *Journal of Biological Chemistry*, 295(46):15438–15453, November 2020. ISSN 0021-9258, 1083-351X. doi: 10.1074/jbc.RA120.015434.
  44. Samantha J. Mascuch, Sara Fakhretaha-Aval, Jessica C. Bowman, Minh Thu H. Ma, Gwendell Thomas, Bettina Bommarius, Chieri Ito, Liangjun Zhao, Gary P. Newnam, Kavita R. Matange, Hem R. Thapa, Brett Barlow, Rebecca K. Donegan, Nguyet A. Nguyen, Emily G. Saccuzzo, Chiamaka T. Obianyor, Suneesh C. Karunakaran, Pamela Pollet, Brooke Rothschild-Mancinelli, Santi Mestre-Fos, Rebecca Guth-Metzler, Anton V. Bryksin, Anton S. Petrov, Mallory Hazell, Carolyn B. Ibberson, Petar I. Penev, Robert G. Mannino, Wilbur A. Lam, Andrés J. Garcia, Julia M. Kubanek, Vinayak Agarwal, Nicholas V. Hud, Jennifer Blanchard Glass, Loren Dean Williams, and Raquel L. Lieberman. Buzz about RT-qPCR: An RT-qPCR formulation for SARS-CoV-2 detection using reagents produced at Georgia Institute of Technology. preprint, *Infectious Diseases (except HIV/AIDS)*, July 2020.
  45. Phil Oberacker, Peter Stepper, Donna M. Bond, Sven Höhn, Jule Focken, Vivien Meyer, Luca Schelle, Victoria J. Sugrue, Gert-Jan Jeunen, Tim Moser, Steven R. Hore, Ferdinand von Meyenn, Katharina Hipp, Timothy A. Hore, and Tomasz P. Jurkowski. Bio-On-Magnetic-Beads (BOMB): Open platform for high-throughput nucleic acid extraction and manipulation. *PLoS Biology*, 17(1):e3000107, January 2019. ISSN 1545-7885. doi: 10.1371/journal.pbio.3000107.
  46. Author Pipette Jockey. Mashup RT Update #2 – Our Take on Purification/Activity Assays/Buffer Optimization, July 2019. Library Catalog: pipettejockey.com.
  47. Amanda M. Casto, Meei-Li Huang, Arun Nalla, Garrett A. Perchetti, Reigran Sampoleo, Lasata Shrestha, Yulun Wei, Haiying Zhu, Alexander L. Greninger, and Keith R. Jerome. Comparative Performance of SARS-CoV-2 Detection Assays using Seven Different Primer/Probe Sets and One Assay Kit. preprint, *Infectious Diseases (except HIV/AIDS)*, March 2020.
  48. Chantal B.F. Vogels, Anderson F. Brito, Anne Louise Wyllie, Joseph R Fauver, Isabel M. Ott, Chaney C. Kalinich, Mary E. Petrone, Arnau Casanovas-Massana, M. Catherine Muenker, Adam J. Moore, Jonathan Klein, Peiwen Lu, Alice Lu-Culligan, Xi-aodong Jiang, Daniel J. Kim, Eriko Kudo, Tianyang Mao, Miyu Moriyama, Ji Eun Oh, Annsea Park, Julio Silva, Eric Song, Takehiro Takehashi, Manabu Taura, Maria Tokuyama, Arvind Venkataraman, Orr-El Weizman, Patrick Wong, Yexin Yang, Nagarjuna R. Cheemarla, Elizabeth White, Sarah Lapidus, Rebecca Earnest, Bertie Geng, Pavithra Vijayakumar, Camila Odio, John Fournier, Santos Bermejo, Shelli Farhadian, Charles Dela Cruz, Akiko Iwasaki, Albert I. Ko, Marie-Louise Landry, Ellen F. Foxman, and Nathan D. Grubaugh. Analytical sensitivity and efficiency comparisons of SARS-CoV-2 qRT-PCR primer-probe sets. preprint, *Infectious Diseases (except HIV/AIDS)*, April 2020.
  49. Christian Camacho, George Coulouris, Vahram Avagyan, Ning Ma, Jason Papadopoulos, Kevin Bealer, and Thomas L. Madden. BLAST+: architecture and applications. *BMC bioinformatics*, 10:421, December 2009. ISSN 1471-2105. doi: 10.1186/1471-2105-10-421.
  50. Rob J. Dekker, Wim A. Ensink, Selina van Leeuwen, Han Rauwerda, and Timo M. Breit. Overhauling a faulty control in the CDC-recommended SARS-CoV-2 RT-PCR test panel. preprint, *Microbiology*, June 2020.
  51. Author Pipette Jockey. Purifying commonly used enzymes / Homebrew pfu-sso7d, August 2017. Library Catalog: pipettejockey.com.
  52. Daniel Aird, Michael G Ross, Wei-Sheng Chen, Maxwell Danielsson, Timothy Fennell, Carsten Russ, David B Jaffe, Chad Nusbaum, and Andreas Gnirke. Analyzing and minimizing PCR amplification bias in Illumina sequencing libraries. *Genome Biology*, 12(2):R18, 2011. ISSN 1465-6906. doi: 10.1186/gb-2011-12-2-r18.
  53. Longhua Guo, James Boockook, Jacob M. Tome, Sukantha Chandrasekaran, Evann E. Hilt, Yi Zhang, Laila Sathe, Xinmin Li, Chongyuan Luo, Sriram Kosuri, Jay A. Shendure, Valerie A. Arboleda, Jonathan Flint, Eleazar Eskin, Omai B. Garner, Shangxin Yang, Joshua S. Bloom, Leonid Kruglyak, and Yi Yin. Rapid cost-effective viral genome sequencing by V-seq. preprint, *Genomics*, August 2020.
  54. Rick Farouni, Haig Djambazian, Lorenzo E. Ferri, Jiannis Ragousis, and Hamed S. Najafabadi. Model-based analysis of sample index hopping reveals its widespread artifacts in multiplexed single-cell RNA-sequencing. *Nature Communications*, 11(1), December 2020. ISSN 2041-1723. doi: 10.1038/s41467-020-16522-z.
  55. Laura E. MacConaill, Robert T. Burns, Anwesha Nag, Haley A. Coleman, Michael K. Slevin, Kristina Giorda, Madelyn Light, Kevin Lai, Mirna Jarosz, Matthew S. McNeill, Matthew D. Ducar, Matthew Meyerson, and Aaron R. Thorner. Unique, dual-indexed sequencing adapters with UMIs effectively eliminate index cross-talk and significantly improve sensitivity of massively parallel sequencing. *BMC Genomics*, 19(1), December 2018. ISSN 1471-2164. doi: 10.1186/s12864-017-4428-5.
  56. Illumina. Effects of index misassignment on multiplexing and downstream analysis. URL: [www.illumina.com](http://www.illumina.com), 2017.
  57. Tom Smith, Andreas Heger, and Ian Sudbery. UMI-tools: modeling sequencing errors in Unique Molecular Identifiers to improve quantification accuracy. *Genome Research*, 27(3):491–499, March 2017. ISSN 1088-9051, 1549-5469. doi: 10.1101/gr.209601.116.
  58. H. Li and R. Durbin. Fast and accurate short read alignment with Burrows-Wheeler transform. *Bioinformatics*, 25(14):1754–1760, July 2009. ISSN 1367-4803, 1460-2059. doi: 10.1093/bioinformatics/btp324.
  59. H. Li, B. Handsaker, A. Wysoker, T. Fennell, J. Ruan, N. Homer, G. Marth, G. Abecasis, R. Durbin, and 1000 Genome Project Data Processing Subgroup. The Sequence Alignment/Map format and SAMtools. *Bioinformatics*, 25(16):2078–2079, August 2009. ISSN 1367-4803, 1460-2059. doi: 10.1093/bioinformatics/btp352.
  60. R Core Team (2018). R: A language and environment for statistical computing.
  61. Hadley Wickham, Mara Averick, Jennifer Bryan, Winston Chang, Lucy McGowan, Romain François, Garrett Grolemund, Alex Hayes, Lionel Henry, Jim Hester, Max Kuhn, Thomas Pedersen, Evan Miller, Stephan Bache, Kirill Müller, Jeroen Ooms, David Robinson, Dana Seidel, Vitalie Spinu, Kohske Takahashi, Davis Vaughan, Claus Wilke, Kara Woo, and Hiroaki Yutani. Welcome to the Tidyverse. *Journal of Open Source Software*, 4(43):1686, November 2019. ISSN 2475-9066. doi: 10.21105/joss.01686.
  62. Hadley Wickham. ggplot2: ggplot2. *Wiley Interdisciplinary Reviews: Computational Statistics*, 3(2):180–185, March 2011. ISSN 19395108. doi: 10.1002/wics.147.

## Supplementary Figures and Material for Vonesch *et al.* 2020

### McQ - An open-source multiplexed SARS-CoV-2 quantification platform

Sibylle C Vonesch<sup>1\*</sup>, Danila Bredikhin<sup>1</sup>, Nikolay Dobrev<sup>2</sup>, Laura Villacorta<sup>3</sup>, Rozemarijn Kleinendorst<sup>1</sup>, Elisabetta Cacace<sup>1</sup>, Julia Flock<sup>2</sup>, Max Frank<sup>1</sup>, Ferris Jung<sup>3</sup>, Julia Kornienko<sup>1</sup>, Karin Mitosch<sup>1</sup>, Mireia Osuna-López<sup>3</sup>, Jürgen Zimmermann<sup>3</sup>, Stephan Göttig<sup>4</sup>, Axel Hamprecht<sup>5,6</sup>, Hans-Georg Kräusslich<sup>7,8</sup>, Michael Knop<sup>9,10,11,12</sup>, Athanasios Typas<sup>1</sup>, Lars M Steinmetz<sup>1,13,14\*</sup>, Vladimir Benes<sup>3\*</sup>, Kim Remans<sup>2\*</sup>, Arnaud R Krebs<sup>1\*</sup>

<sup>1</sup>European Molecular Biology Laboratory (EMBL), Genome Biology Unit, 69117, Heidelberg, Germany. <sup>2</sup>European Molecular Biology Laboratory (EMBL), Protein Expression and Purification Facility, 69117, Heidelberg, Germany.

<sup>3</sup>European Molecular Biology Laboratory (EMBL), Genomics Core Facility, 69117, Heidelberg, Germany. <sup>4</sup>Institute of Medical Microbiology and Infection Control, Hospital of Goethe University, Frankfurt am Main, Germany. <sup>5</sup>Institut für medizinische Mikrobiologie, Immunologie und Hygiene, 50935 Köln, Germany. <sup>6</sup>Institut für med. Mikrobiologie und Virologie, Carl von Ossietzky Universität Oldenburg, 26129 Oldenburg, Germany. <sup>7</sup>Center for Infectious Diseases, Department of Virology, Universitätsklinikum Heidelberg, 69117, Heidelberg, Germany. <sup>8</sup>Deutsches Zentrum für Infektionsforschung, partner site Heidelberg, Heidelberg, Germany. <sup>9</sup>Center for Molecular Biology of Heidelberg University (ZMBH), Heidelberg, Germany. <sup>10</sup>German Center for Infection Research (DZIF), Heidelberg, Germany. <sup>11</sup>German Cancer Research Center (DKFZ), Heidelberg, Germany. <sup>12</sup>DKFZ-ZMBH Alliance, Heidelberg, Germany. <sup>13</sup>Stanford Genome Technology Center, Stanford University, 3165 Porter Drive, Palo Alto, CA 94304, USA. <sup>14</sup>Department of Genetics, Stanford University School of Medicine, Stanford, California, USA.

\*corresponding authors

Correspondence should be addressed to [sibylle.vonesch@embl.de](mailto:sibylle.vonesch@embl.de); [larsms@embl.de](mailto:larsms@embl.de); [benes@embl.de](mailto:benes@embl.de); [kim.remans@embl.de](mailto:kim.remans@embl.de); [arnaud.krebs@embl.de](mailto:arnaud.krebs@embl.de)



**A**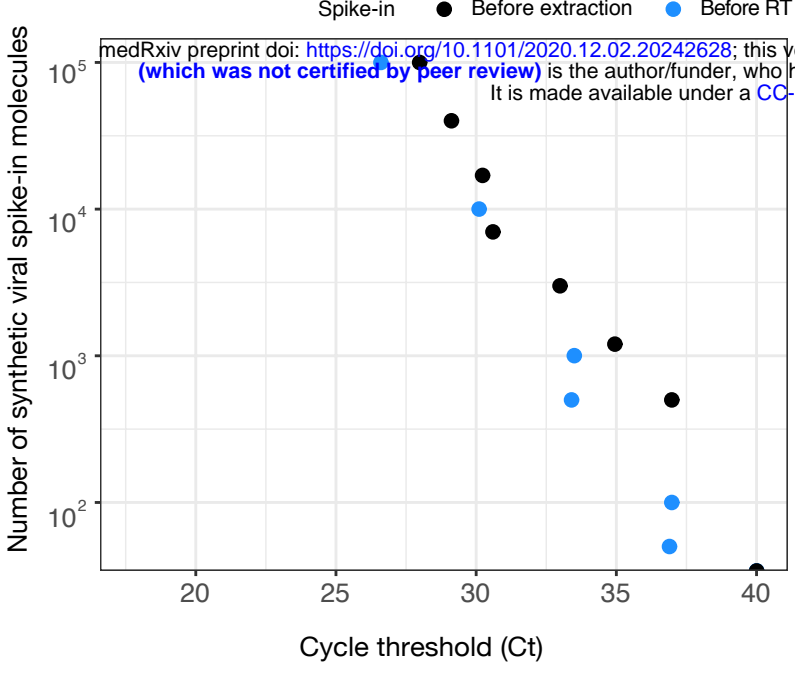**B**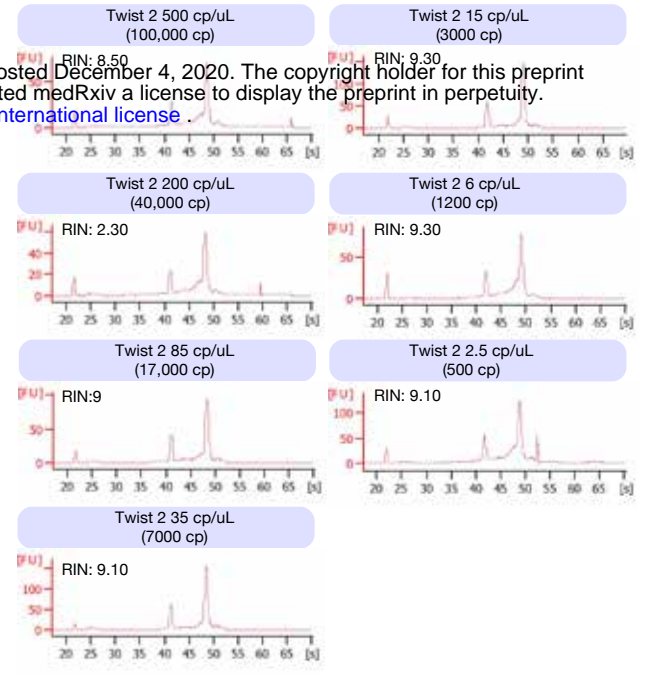**C**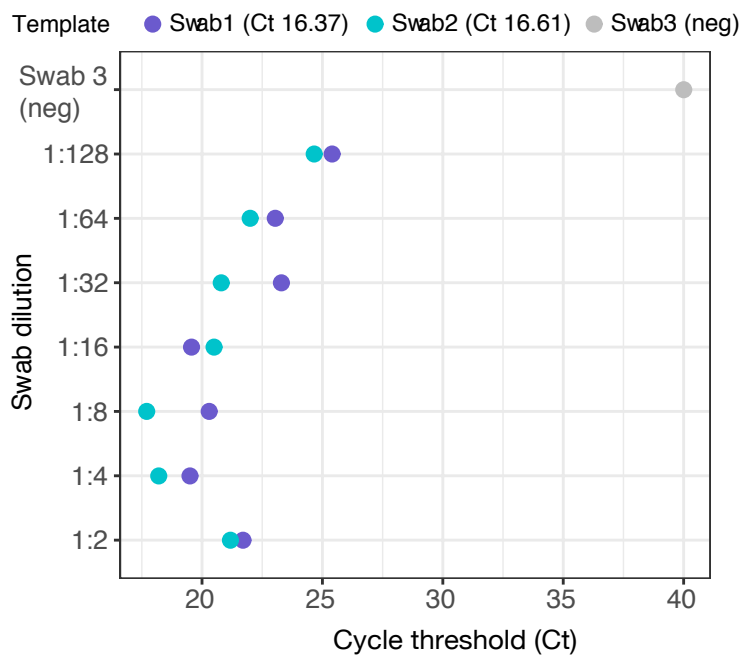**D**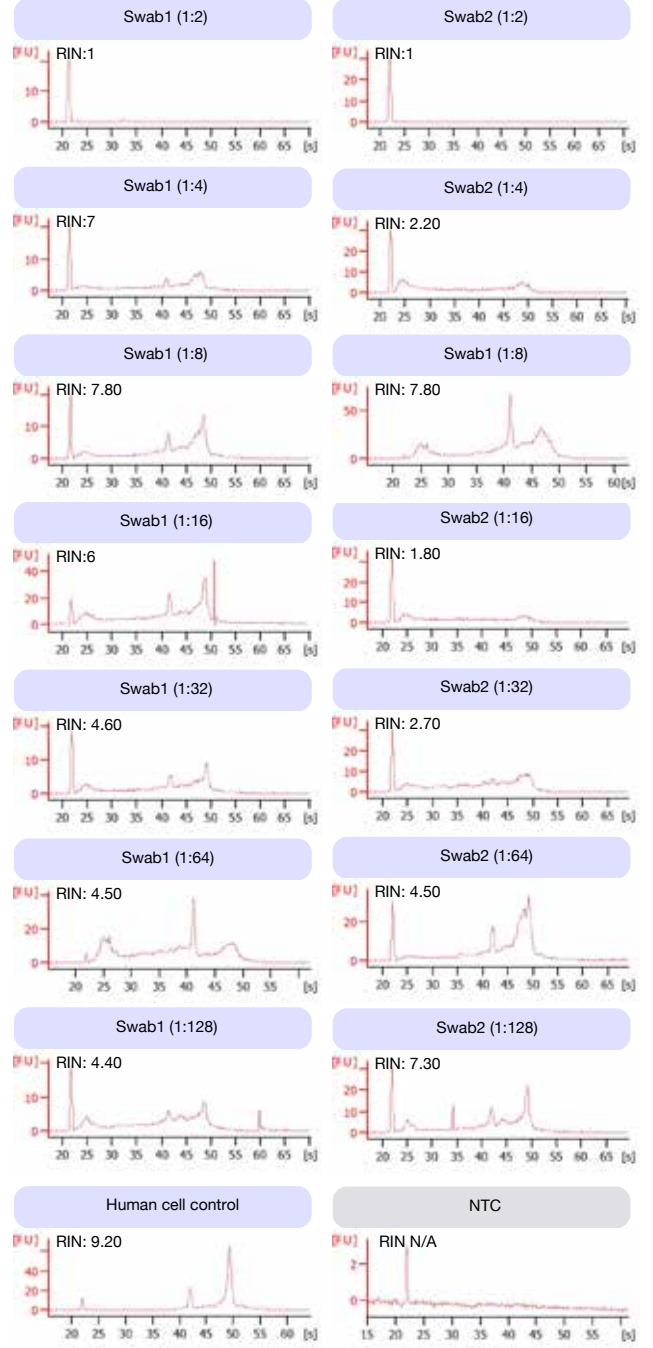**E**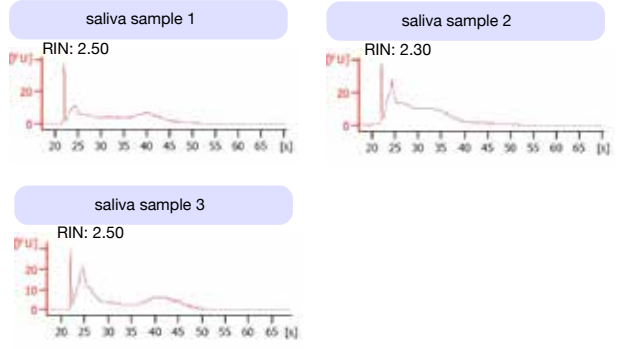

**Figure S1. RNA extraction benchmarking.** (A) Scatter plot depicts Ct values obtained in RT-qPCR for defined amounts of synthetic SARS-CoV-2 template added to samples before RNA extraction (spiked into Expi293F cell suspension at 106 cells/ml in saline solution) or directly added prior to BE-6. (B) Bioanalyzer traces and RNA integrity numbers (RIN) for extracted Expi293F cell suspension (200 µl) spiked with indicated amounts of synthetic SARS-CoV-2 template. (C) Scatter plot depicts Ct values obtained in RT-qPCR for dilutions of two swab samples extracted manually with our magnetic bead-based RNA extraction workflow that were previously tested positive via qPCR. (D) Bioanalyzer traces and RNA integrity numbers (RIN) for extracted swab samples diluted prior to extraction. NTC = no template control. Human cell control is a suspension of cells without viral RNA spiked in. (E) Bioanalyzer traces and RNA integrity numbers (RIN) for saliva samples extracted with our automated workflow.

A

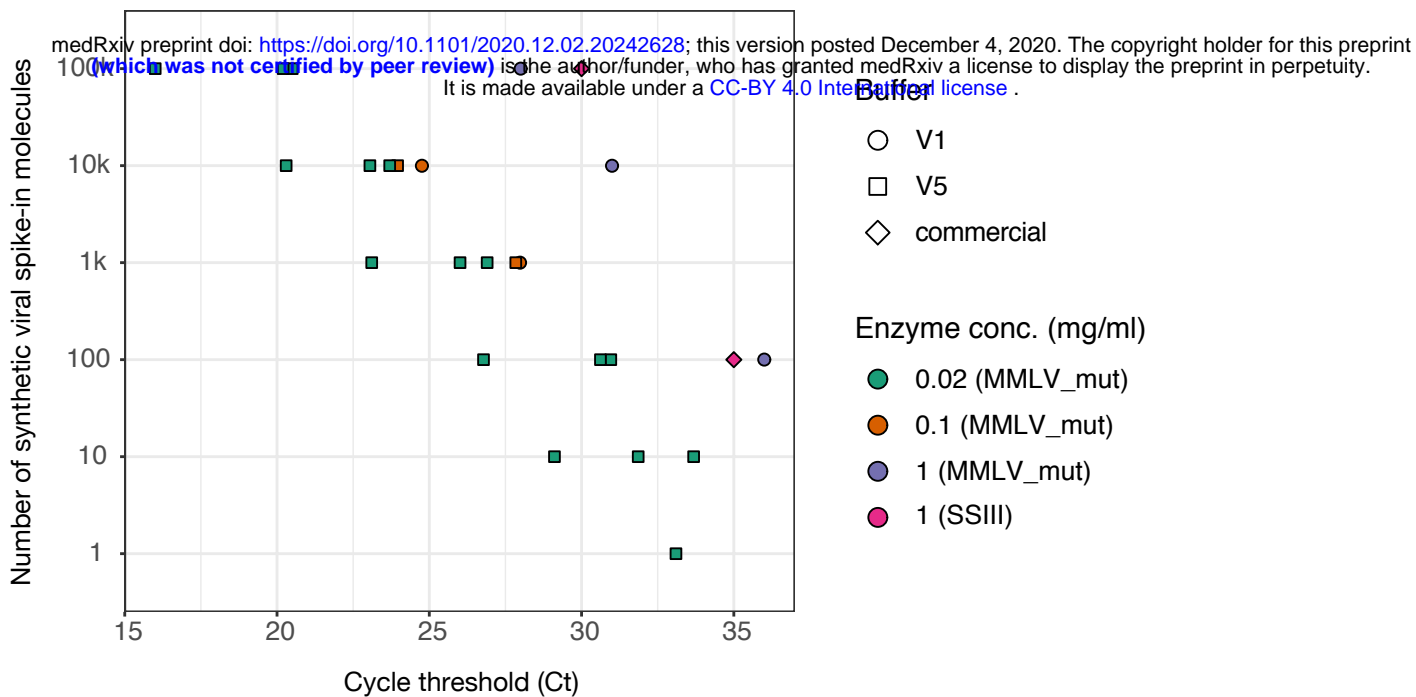

B

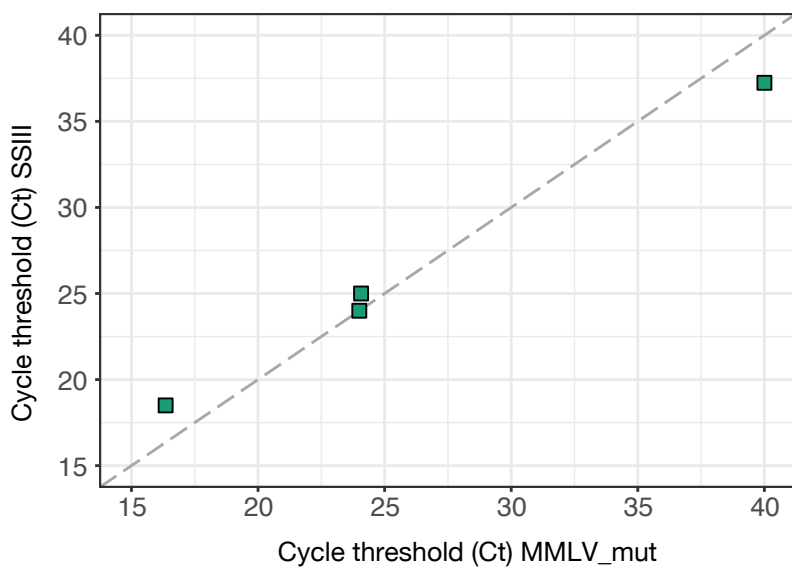

**Figure S2. Establishing MMLV\_mut reaction conditions.** (A) Scatter plot of Ct values obtained for defined amounts of synthetic viral RNA template spiked into reactions. Colors label different MMLV\_mut enzyme concentrations used in reverse transcription (stocks of 0.02 mg/ml, 0.1 mg/ml or 1 mg/ml) and shapes encode different buffers. (B) Comparison of Ct values obtained for four clinical samples with MMLV\_mut using optimized conditions (buffer V5 and 0.02 mg/ml enzyme stock) and SYBR Green Ready mix, and Ct values obtained from RT-qPCR assays run in a clinical diagnostics facility using a commercially available test kit.

A

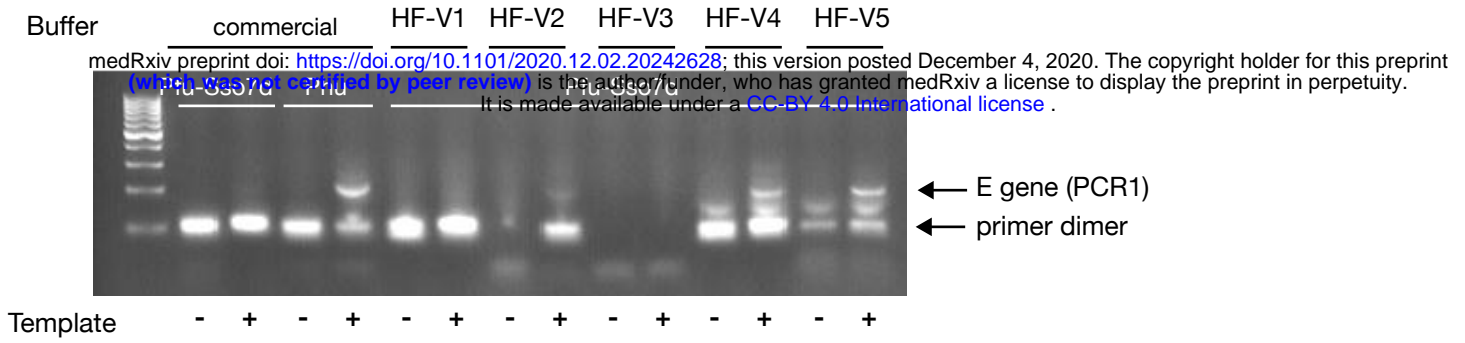

B

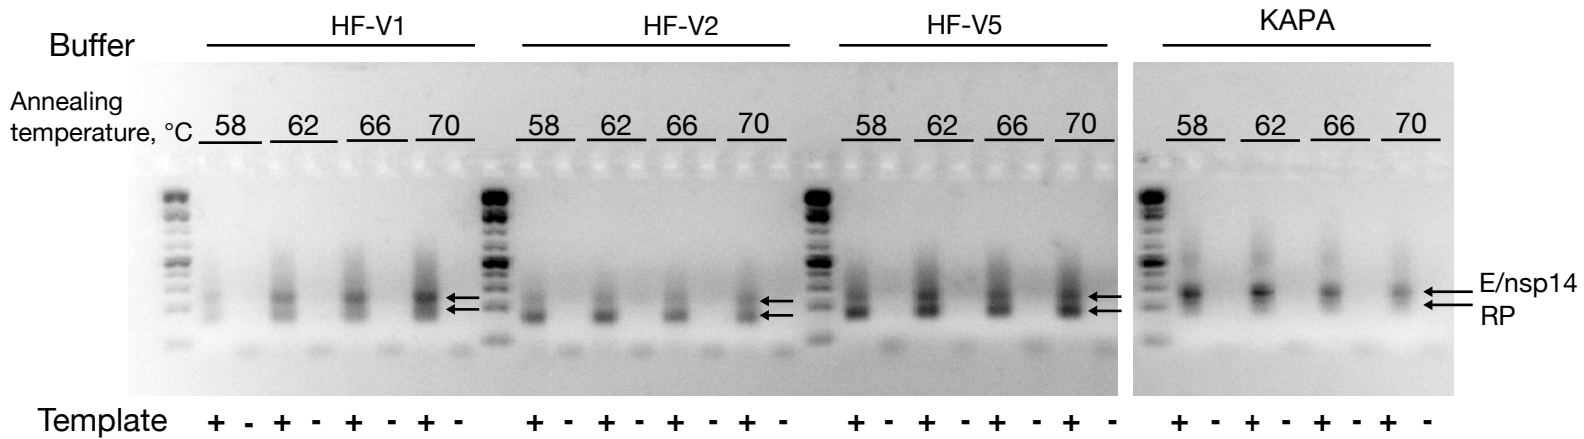

**Figure S3. Performance of Pfu-Sso7d polymerase in different reaction buffers.** (A) Gel shows E amplicon after PCR1 (216 bp) amplified with homemade Pfu-Sso7d in different reaction buffers (HF V1-V5) and with commercial Phusion polymerase (Phu). PCRs were performed on half of the cDNA reverse transcribed from 10,000 Twist synthetic RNA templates (using E-specific RT primer, RT buffer V1 and 1 mg/ml MMLV\_mut) (+). Non-template controls (-) contain nuclease-free water instead of cDNA. Arrows indicate E amplicon and primer dimer bands. (B) Buffer comparison and annealing gradient for PCR2 with Pfu-Sso7d and commercial KAPA polymerase. PCRs were performed on PCR1 products of mixtures of 10,000 synthetic viral RNA molecules and 100 ng human total RNA reverse transcribed with a mixture of E, nsp14 and RP RT primers (using RT buffer V5 + Tre and 0.1 mg/ml MMLV\_mut) (+). Non-template controls (-) received nuclease-free water instead of cDNA.

A

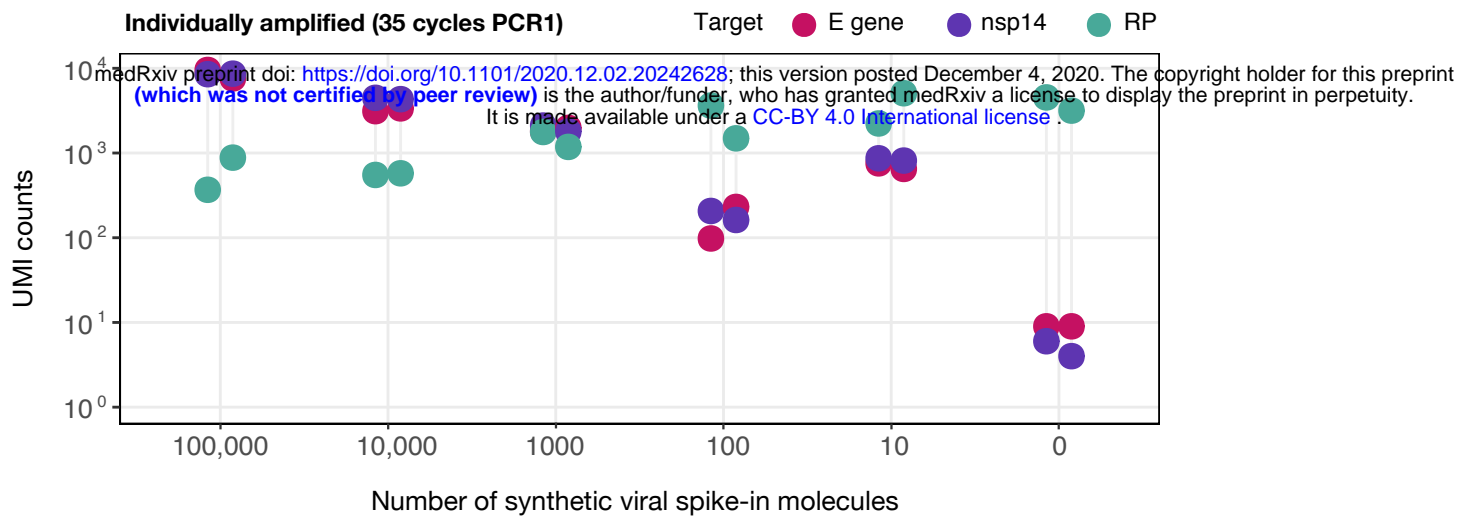

B

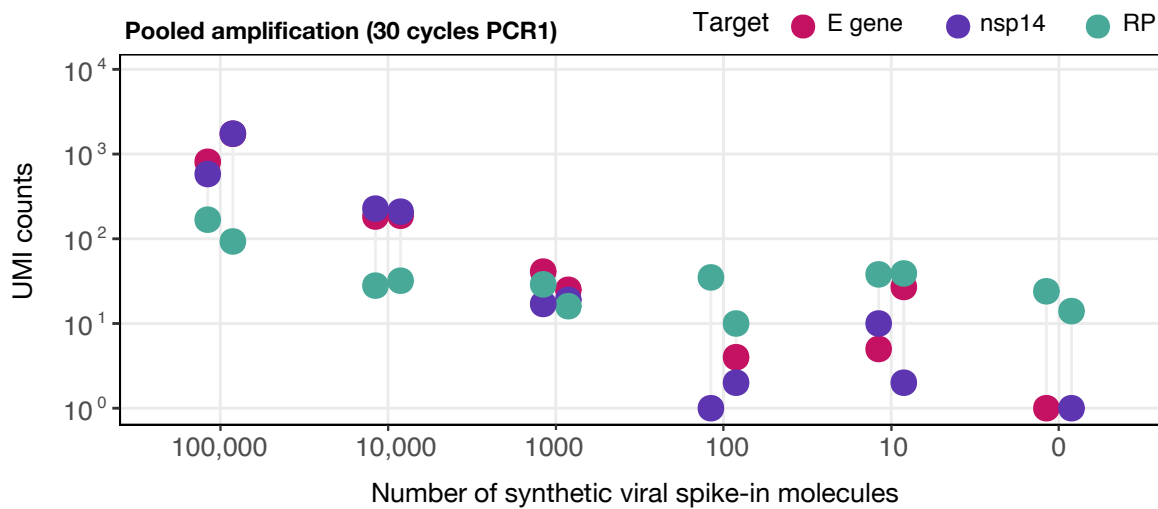

**Figure S4. McQ quantitatively detects synthetic viral RNA templates.** Twelve samples containing defined numbers of synthetic SARS-CoV-2 RNA template (0-100,000 copies) and human RNA were reverse transcribed (using buffer V1 and 1 mg/ml MMLV\_mut stock) and amplified individually (A) or in a pool of twelve (B) using the McQ workflow. Scatter plots depict the number of Unique Molecular Identifiers (UMI) labeling viral targets (E gene: pink, nsp14: purple) or human control (RP: green) as a function of the number of synthetic viral RNA molecules spiked into 10 ng total human RNA. Each viral spike-in amount was processed in duplicate. UMI counts reflect unique RNA templates present in the sample.

A

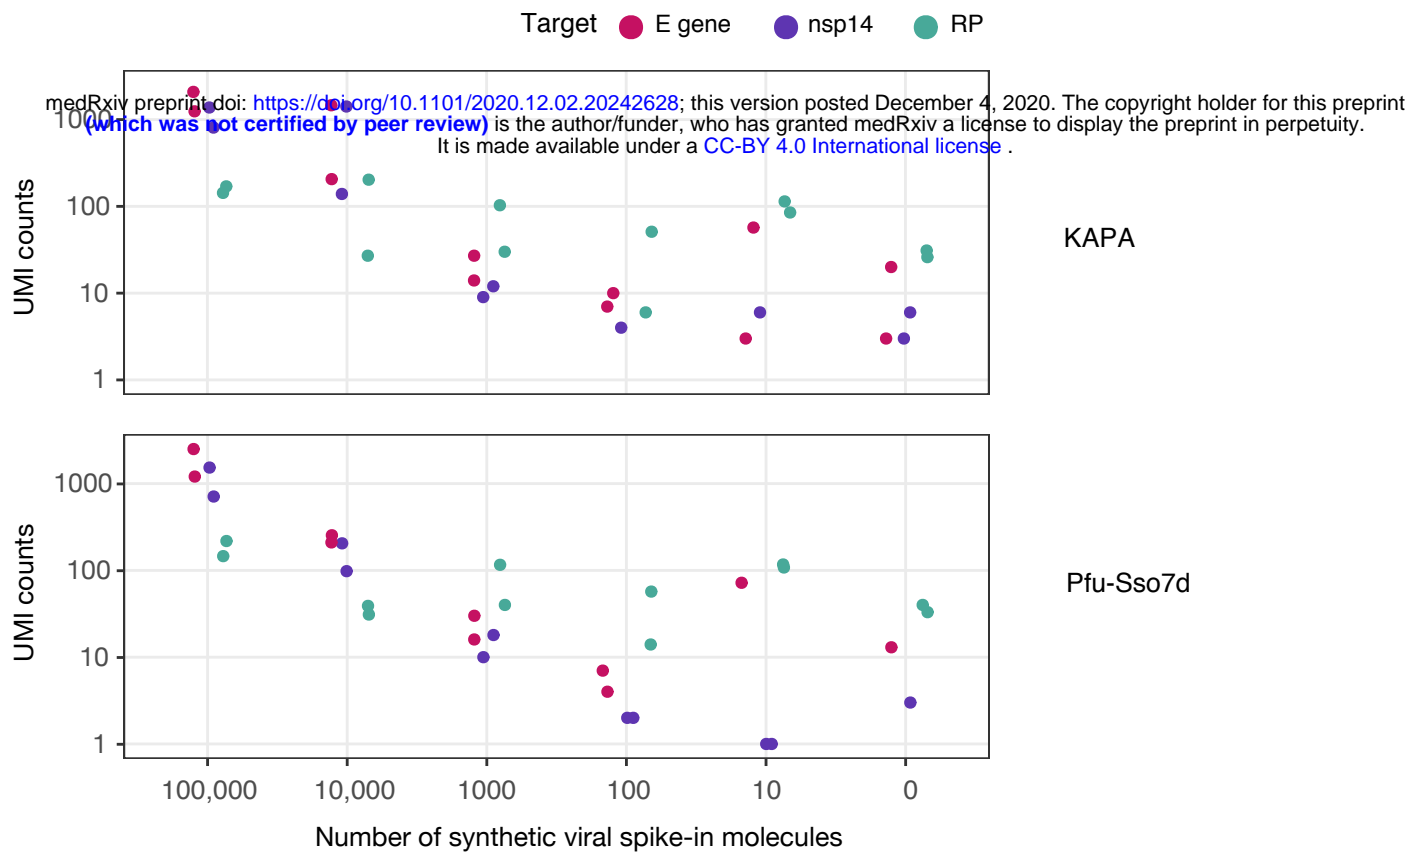

B

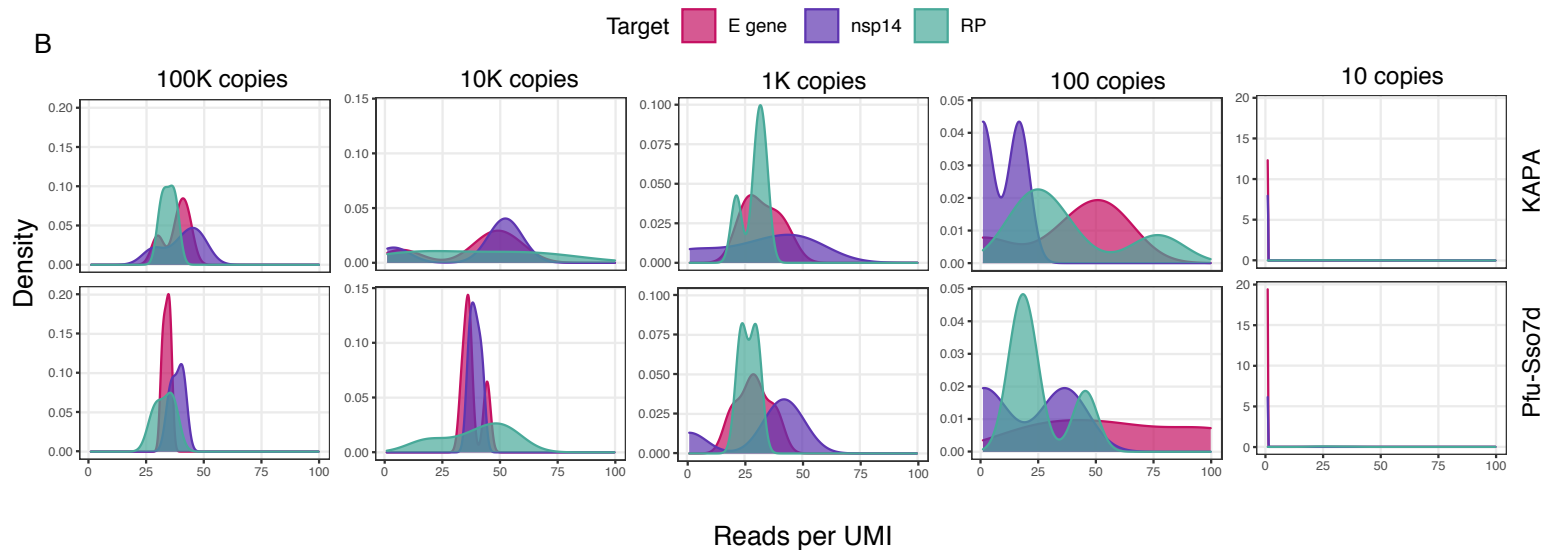

**Figure S5. Benchmarking of homemade Pfu-Sso7d polymerase against commercial KAPA polymerase in PCR2.** (A) Scatter plots show the number of UMI detected for viral targets (E gene: pink, nsp14: purple) or human control (RP: green) for mixtures of 10 ng human total RNA with indicated amounts of viral template with commercial KAPA (upper panel) or homemade Pfu-Sso7d (lower panel) polymerase in PCR2. Pfu-Sso7d was used in PCR1 for both. Each viral spike-in amount was processed in duplicate. (B) Density plots depict distributions of read numbers per UMI for samples containing mixtures of 10 ng human total RNA with indicated numbers of synthetic viral templates. Samples containing defined numbers of synthetic SARS-CoV-2 RNA template (0-100,000 copies) and 10 ng human RNA were processed in pools of twelve using the McQ workflow and using either commercial KAPA (upper panels) or Pfu-Sso7d (lower panels) polymerase in PCR2. Density plots are drawn separately for different targets (E gene: pink, nsp14: purple or human control (RP): green).

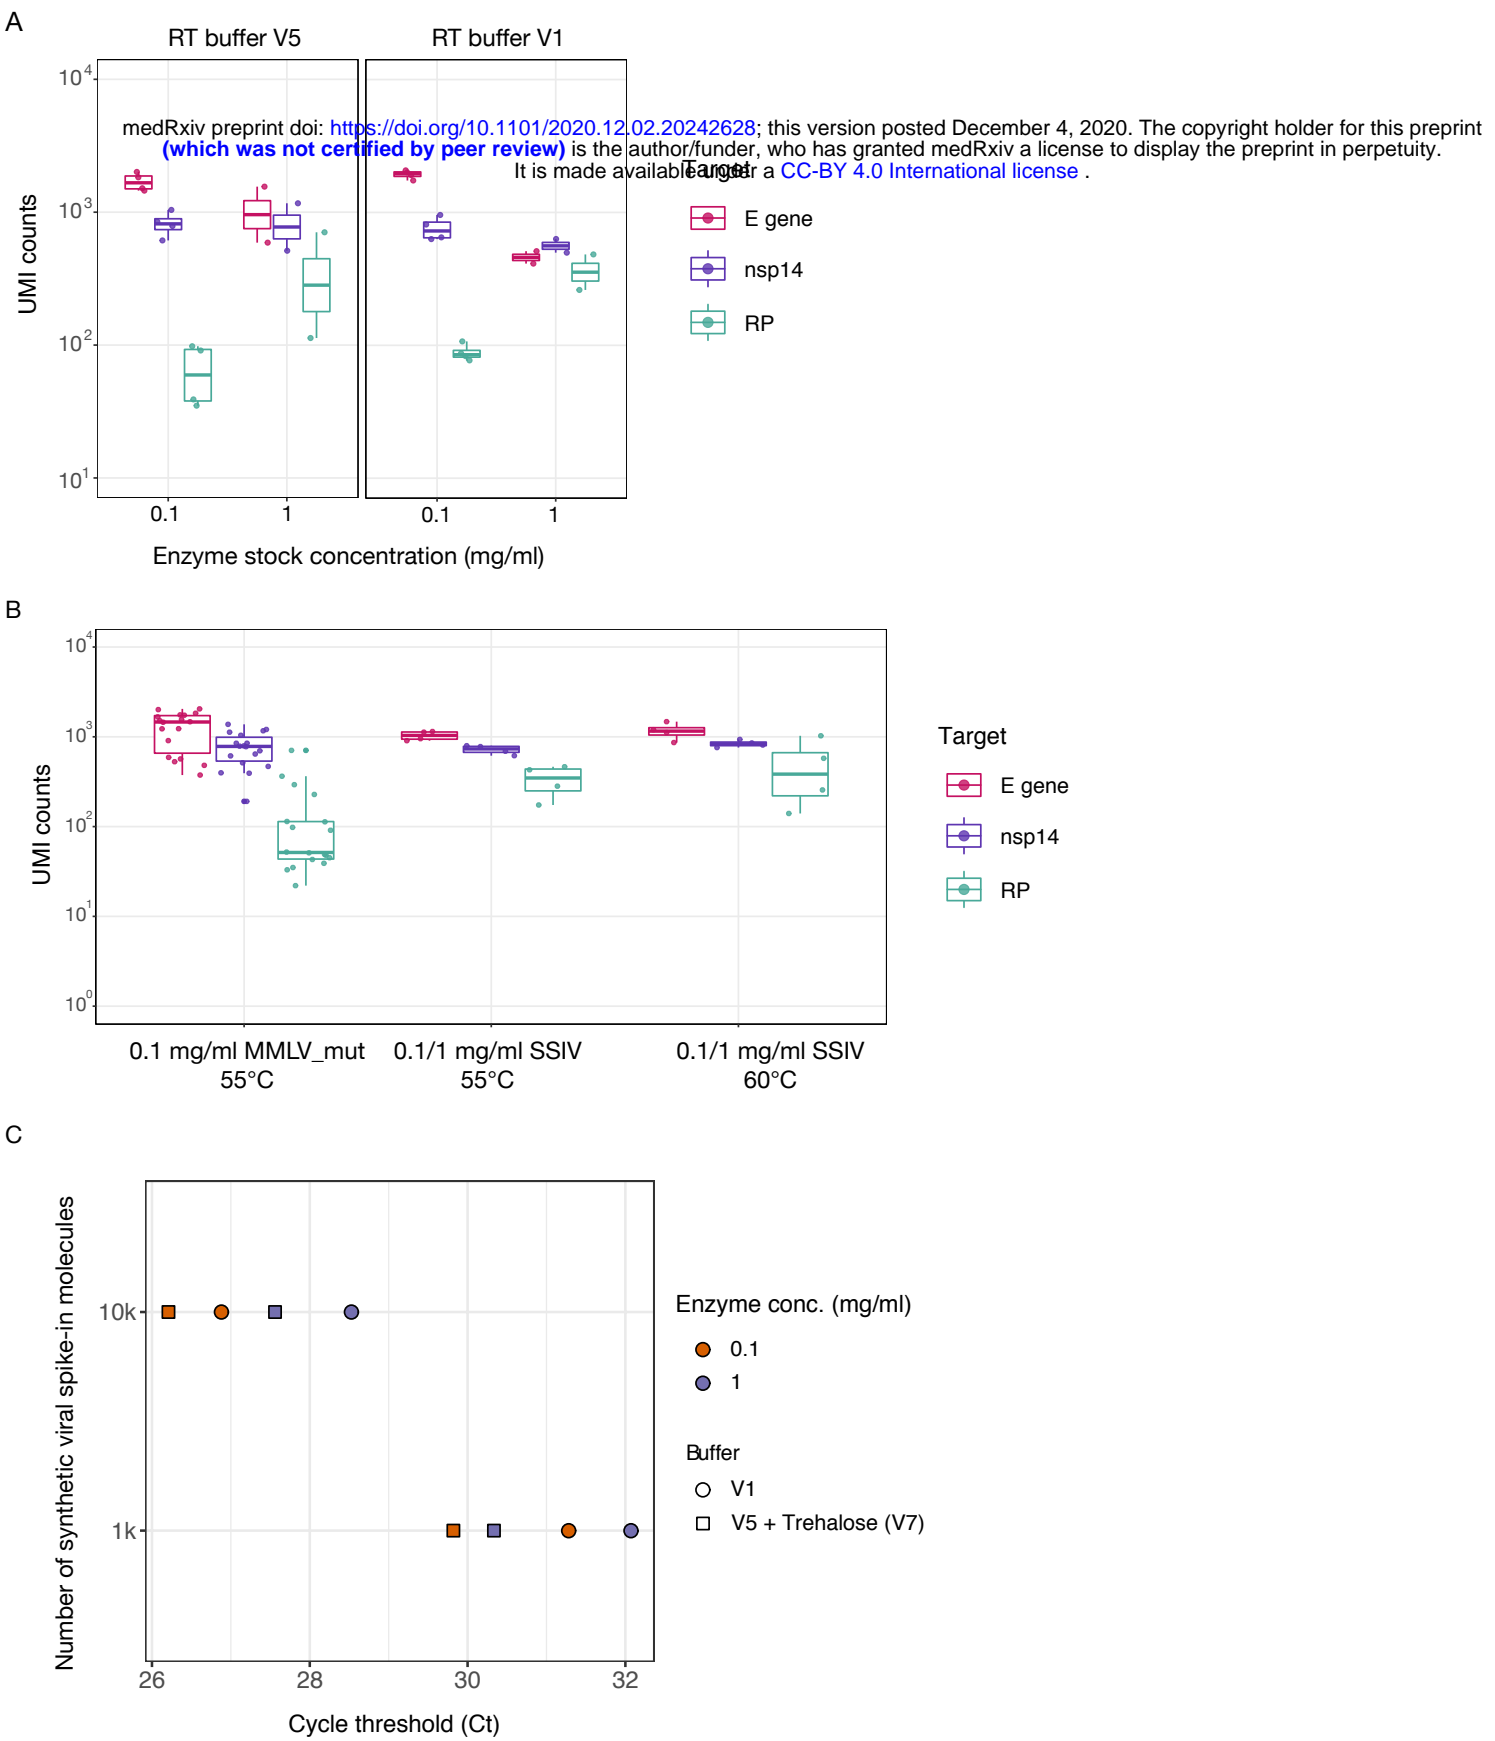

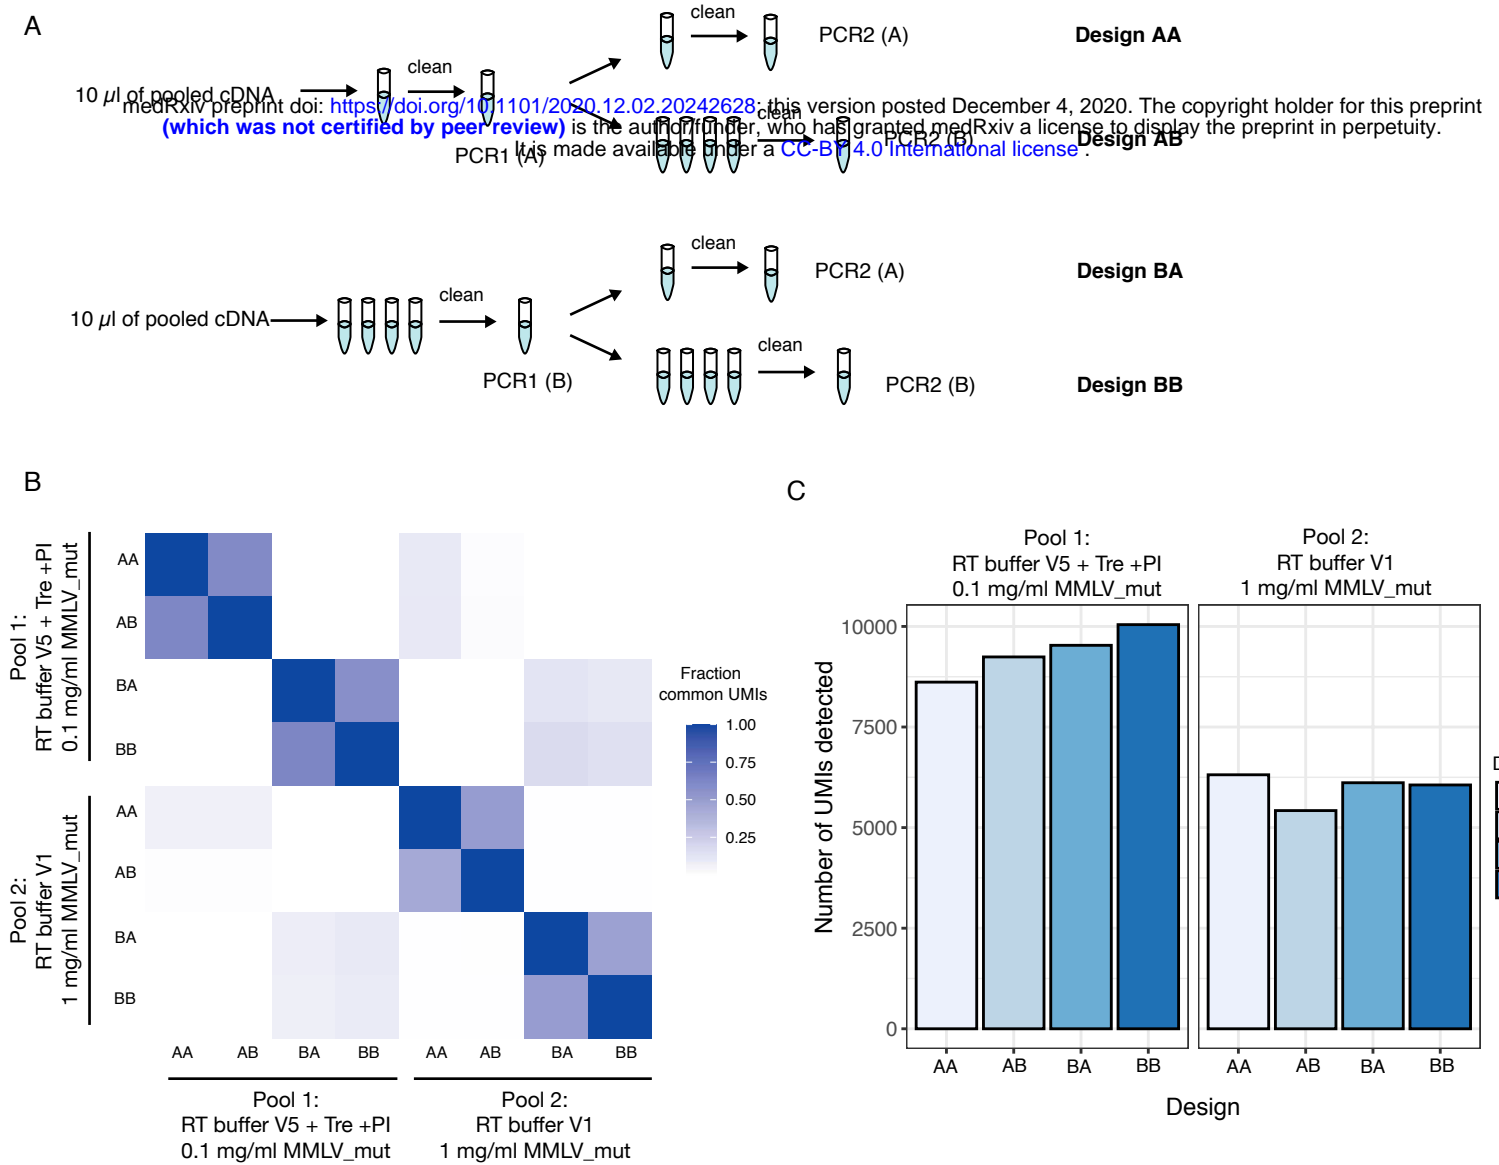

**Figure S7. PCR jackpotting reduces UMI recovery and diversity.** (A) Twelve samples containing defined numbers of synthetic SARS-CoV-2 RNA template (0-100,000 copies) and 10 ng human RNA were reverse transcribed and pooled for PCR amplification. Four different amplification designs were tested to identify PCR-related factors limiting UMI recovery. Samples AA and AB result from the same PCR1 as do samples BA and BB. (B) Heatmap of correlation between samples based on detected UMIs. Color indicates the fraction of UMIs that are shared between two samples. Samples were reverse transcribed in indicated conditions prior to PCR amplification. (C) Number of UMI recovered with each design (representing different PCR amplification strategies) for each pool (representing different reverse transcription conditions).



A

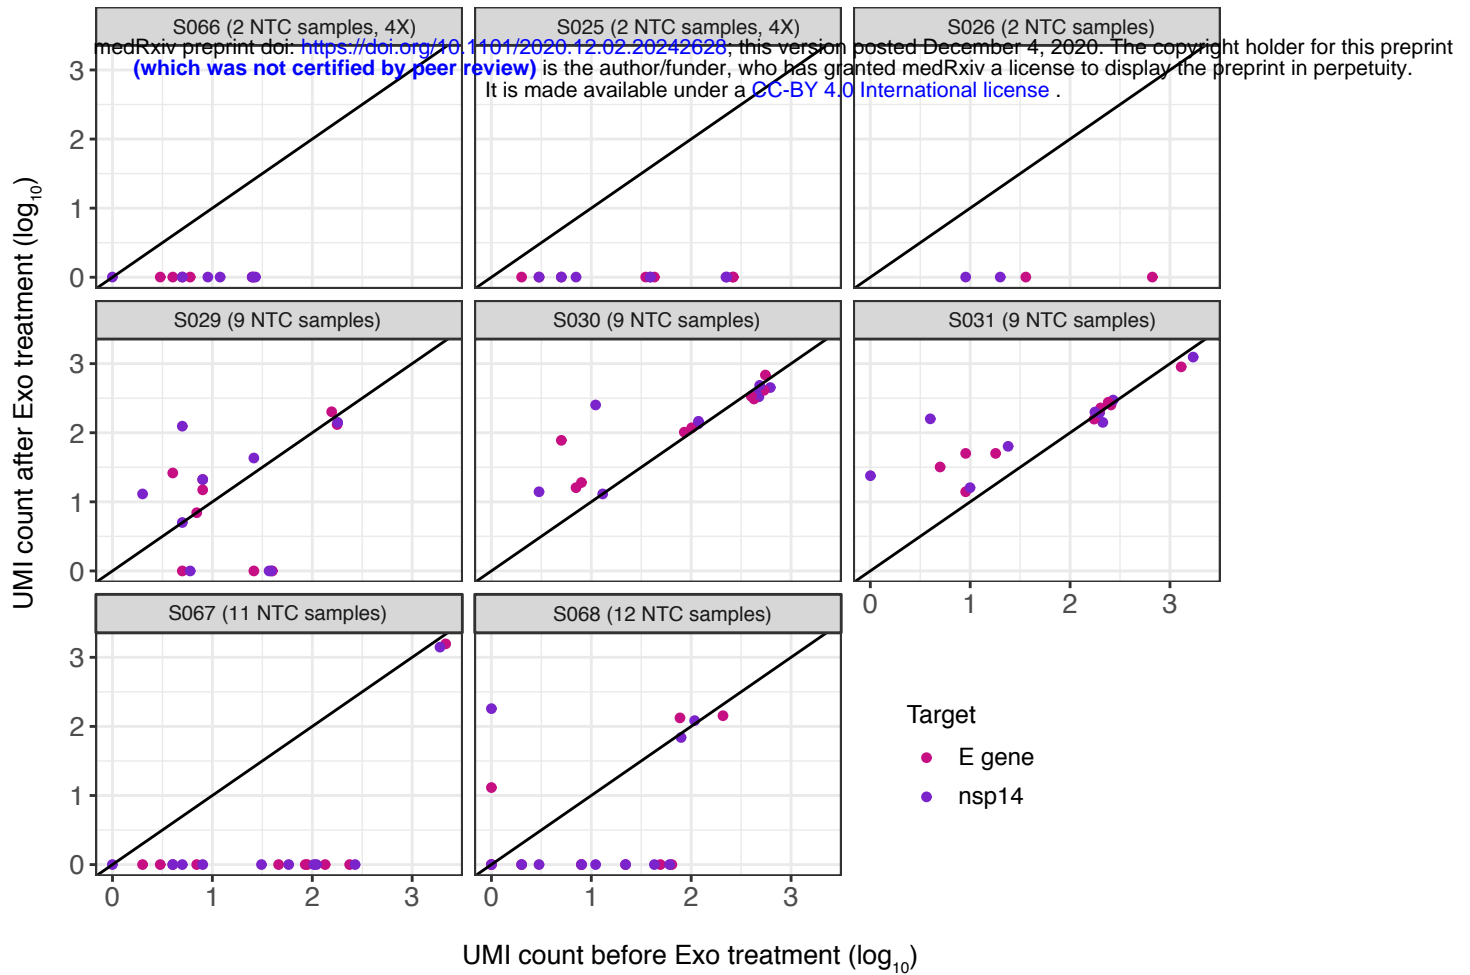

**Figure S8. Free-floating index primers are a source of background reads.** Scatterplots depict number of UMI detected for viral E (pink) and nsp14 (purple) targets in non-template control (NTC) samples (containing only human RNA i.e. representing background levels) in the original samples and the same samples sequenced after an additional Exonuclease I treatment after PCR2 to remove excess index primers. Black line indicates a slope of 1. Sample pool ID and number of NTC samples present in each sample pool are indicated in grey boxes above panels. Sample pools S025 and S066 were present in four variations, but each with identical sample composition.

A

Target ● E gene ● nsp14 ● RP

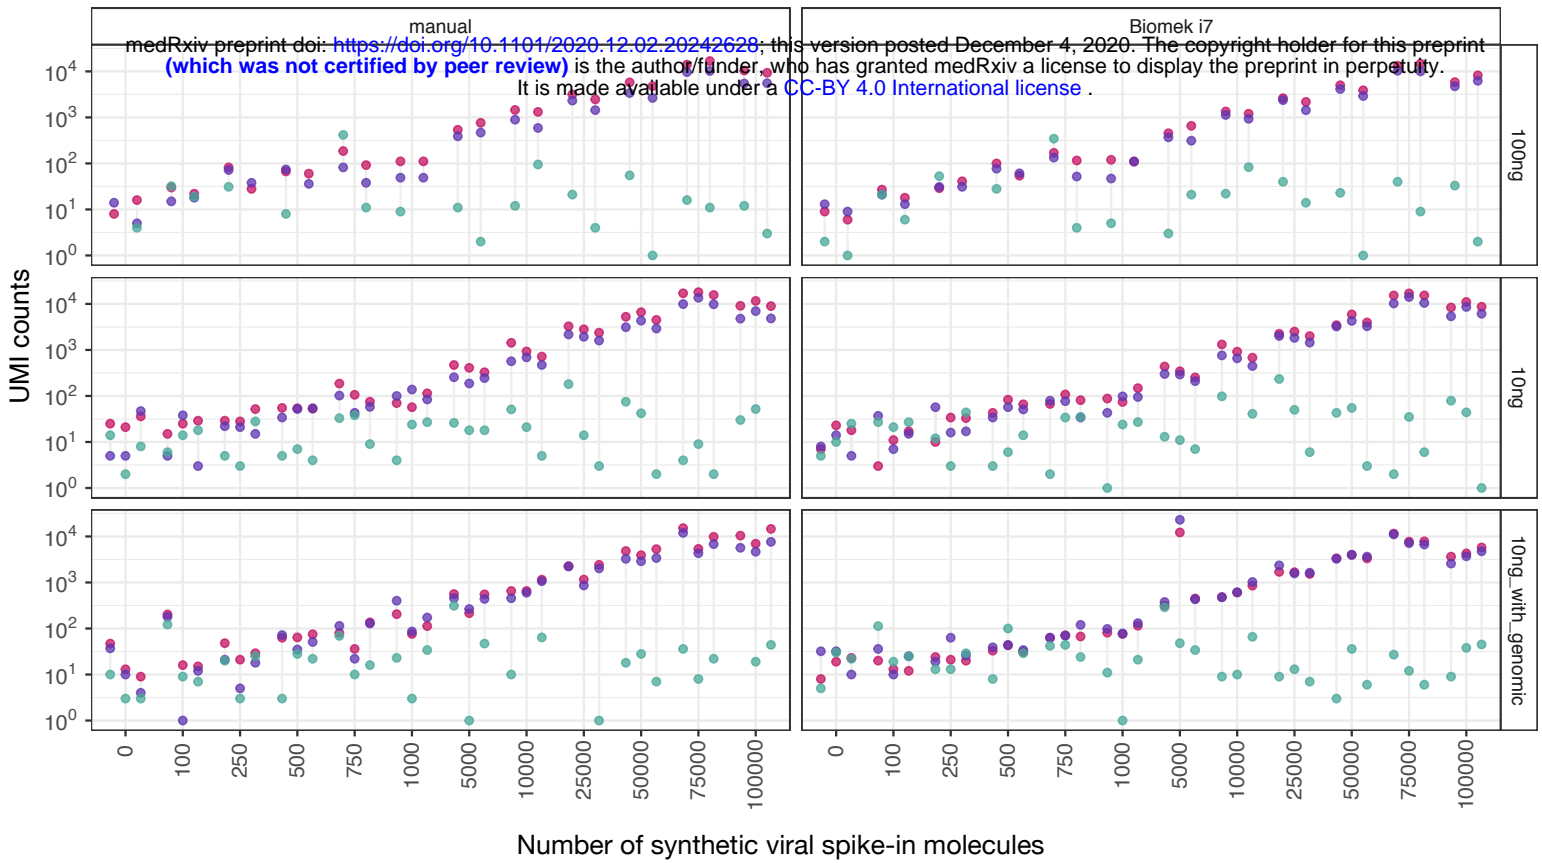

B

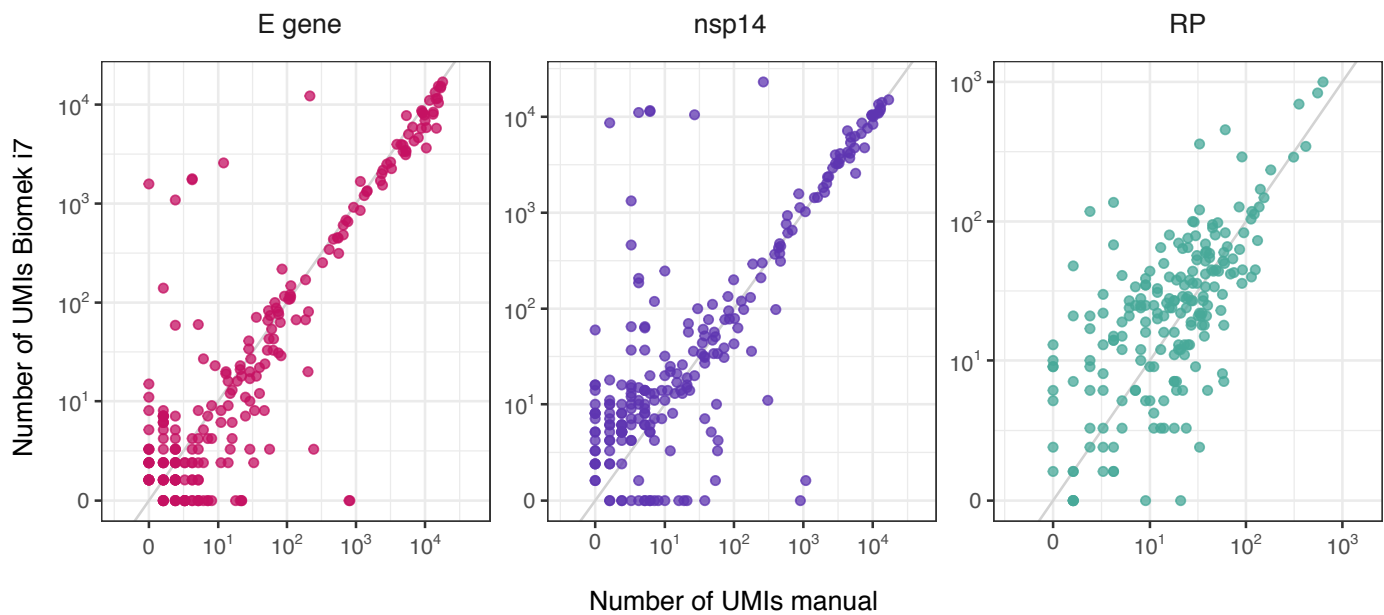

**Figure S9. Benchmarking of McQ RT step on an automated Biomek i7 platform.** (A) 96 samples containing defined numbers of synthetic SARS-CoV-2 RNA template (0-100,000 copies) and human RNA were processed using the McQ workflow and performing RT manually (left, using multichannel pipettes) or on an automated Biomek i7 platform (right, protocol described in File S3). Scatter plots depict the number of UMI labeling viral targets (E gene: pink, nsp14: purple) or human control (RP: green) as a function of the number of synthetic viral RNA molecules spiked into indicated amounts of total human RNA. Each viral spike-in amount was processed with varying amounts of human RNA mixed into the sample (100 ng RNA, 10 ng RNA, 10 ng RNA + 10 ng genomic DNA) in duplicate or triplicate. UMI counts reflect unique RNA templates present in the sample. (B) Comparison of number of UMI detected for each of the 96 samples processed manually or on the i7 platform.

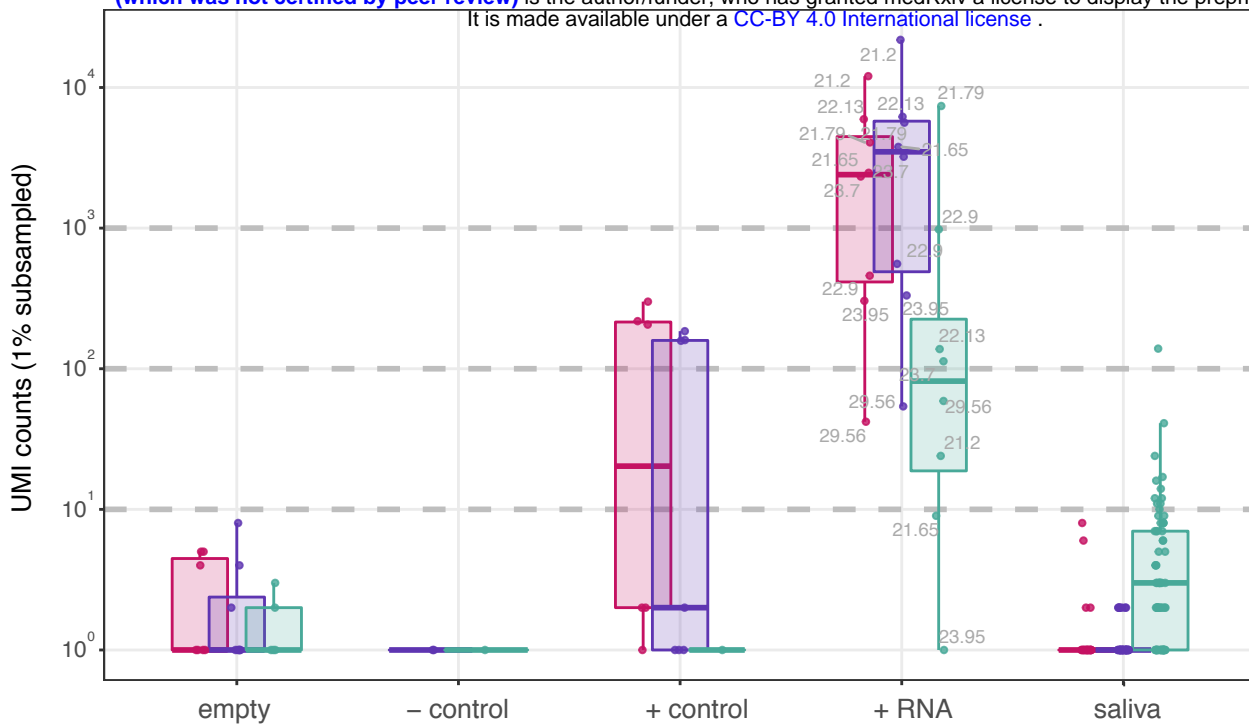

**Figure S10. Detection of SARS-CoV-2 RNA in extracted saliva samples (1% subsampled data).** Scatter plots show the number of UMI detected for viral targets (E gene: pink, nsp14: purple) or human control (RP: green) in RNA extracted from 136 saliva samples provided by healthy volunteers (saliva). Empty = water, added before RNA extraction, negative control = saliva from a previously tested negative sample, positive control = highly diluted negative saliva sample spiked with RNA from a sample tested positive for SARS-CoV-2 and 100,000 molecules of Twist synthetic RNA (in water, spiked in prior to extraction), positive RNA = extracted RNA from samples tested positive for SARS-CoV-2 (added after RNA extraction). Boxplots are overlaid to visualize distributions. Data is the same as Figure 4 except only 1% of the data (corresponding to approximately 2600 reads/sample) is plotted.

## Supplementary File 1: Automation of RNA extraction on the Biomek i7 liquid-handling platform.

The protocol follows the [original protocol](#) by BOMB.Bio<sup>1</sup> adapted for an automated implementation on the Biomek i7. This protocol can in principle be implemented on any liquid handling robot equipped to work with magnetic beads. The input of the automated procedure is a heat-inactivated sample in GITC lysis buffer, manually formatted in 96 deep-well plates from Abgene. Individual steps as programmed on the Biomek i7 are described in Figure 1 and deck layout at start is shown in Figure 2. Table 1 lists required consumables.

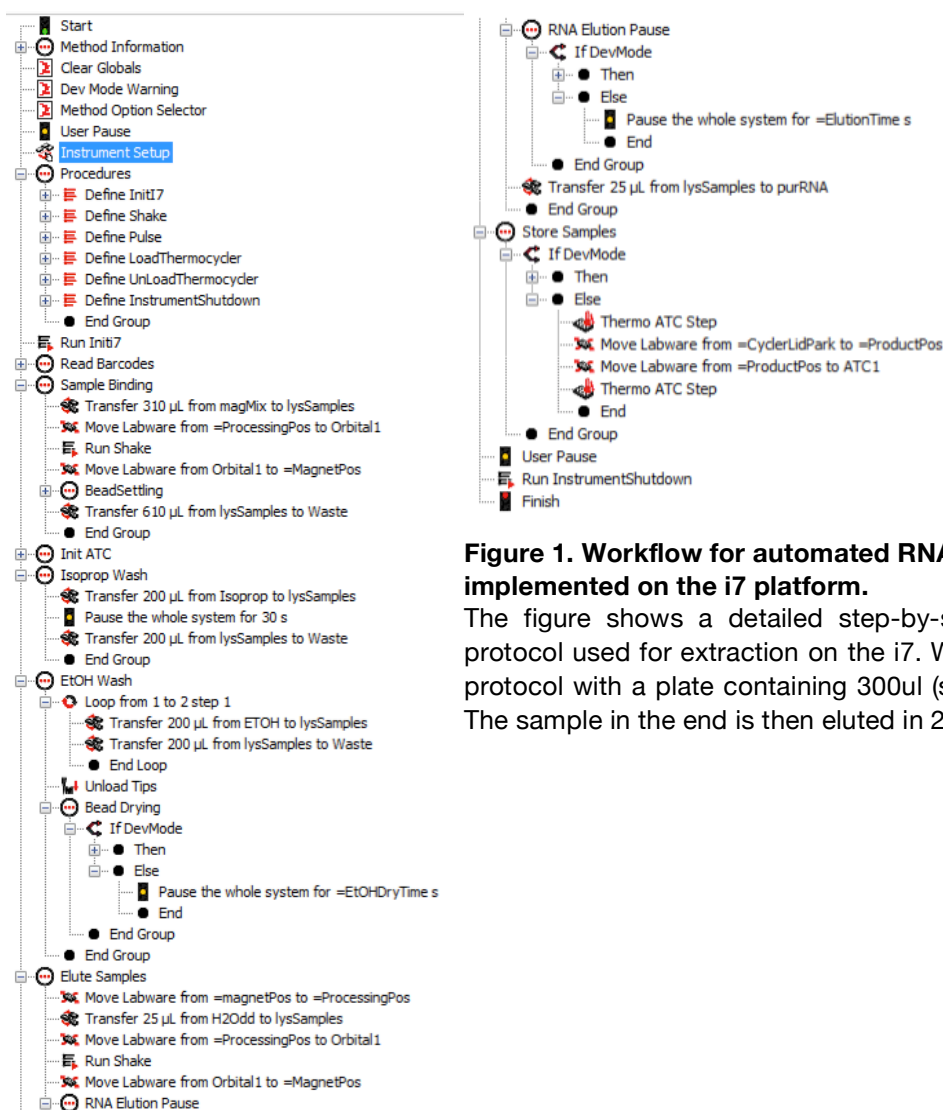

**Figure 1. Workflow for automated RNA extraction implemented on the i7 platform.**

The figure shows a detailed step-by-step workflow of the protocol used for extraction on the i7. We start the extraction protocol with a plate containing 300ul (sample + lysis-buffer). The sample in the end is then eluted in 25ul into a PCR-plate.

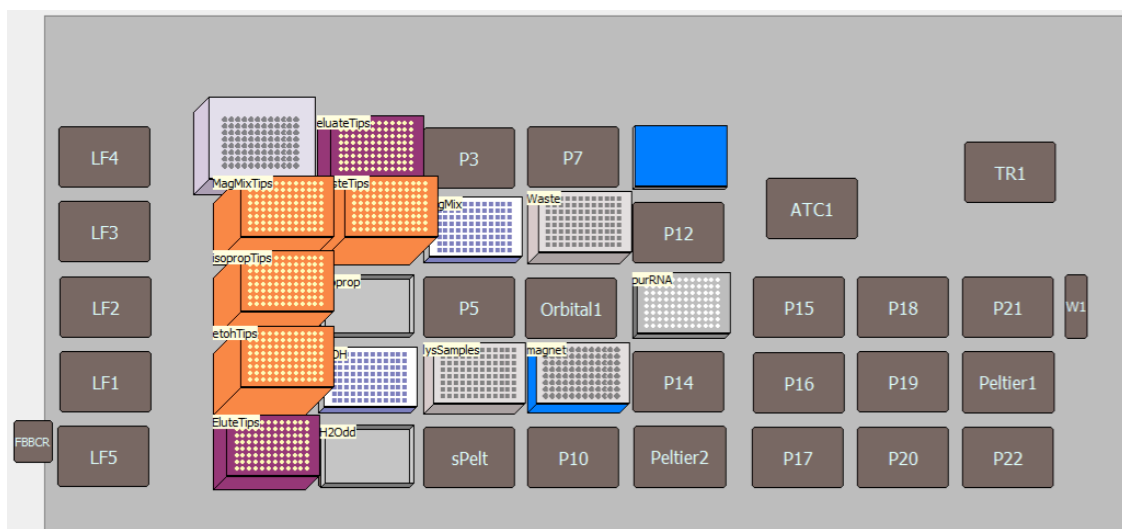

**Figure 2. Deck-layout of the i7 system for RNA extraction.**

Pink boxes are 50ul Beckman tip-boxes, orange boxes are 1000 ul Beckman tip-boxes. “Isoprop” and “H2Odd” are upside-down tip-box lids used as reservoirs. Waste and “lysSamples” are AB-0932 plates. “MagMix” and “EtOH” are AB-1127 plates. The Alpaqua Magnum-EX is used as magnet. Samples are eluted in “purRNA”, which is a barcoded PCR-plate (Thermo). The blue position is a metal PCR-lid used for storing the samples in the cyclor after extraction.

| <i>Material</i>  | <i>Provider</i> | <i>Order #</i> | <i>Number used</i> |
|------------------|-----------------|----------------|--------------------|
| 50 ul tips       | Beckman         | B85888         | 2                  |
| 1000 ul tips     | Beckman         | B85955         | 5                  |
| PCR-plates       | ThermoFischer   |                | 1                  |
| Tip-box lids     | Beckman         | -              | 2                  |
| AB-1127          | Axon            | 26032          | 2                  |
| AB-0932          | ThermoFischer   | AB0932         | 2                  |
| Magnet Magnum EX | Alpaqua         | -              | 1                  |
| PCR-Lid          | -               | -              | 1                  |

**Table 1: Consumables.**

**GITC buffer:**

6 M GITC  
 50 mM Tris-HCl pH 7.6-8  
 2% Sarcosyl  
 20 mM EDTA  
 0.1% Octanal

Silica coated beads (commercial): Serasil-Mag™ 400 beads (# 29357371; Cytiva - Formerly GE Healthcare Life Sciences). Note: 400 means diameter is 400nM. Beads were prepared following the instructions in the BOMB.Bio protocol. The rest of the reagents needed for this protocol are ethanol (70%) and isopropanol.

## Supplementary File 2: Expression and purification of homemade enzymes.

### Expression and purification of MMLV\_mut reverse transcriptase

The construct encoding the MMLV\_mut reverse transcriptase was a kind gift from Dr. Louise Walport and Dr. Svend Kjaer (Francis Crick Institute, London). The pET28a MMLV\_mut plasmid was transformed freshly into *E. coli* BL21(DE3) cells (Stratagene). Cells were grown in TB-FB auto-induction medium (TB-FB + 0.05% glucose + 1.5% lactose + 2 mM MgSO<sub>4</sub>) supplemented with 30 µg/ml kanamycin at 37°C until OD<sub>600</sub> ~ 0.9. The temperature was then lowered to 18°C and the cells were grown further overnight at 18°C. The next morning, the cells were harvested by centrifugation. The cell pellet was resuspended in lysis buffer (50 mM Tris-HCl pH 8.0 (4°C), 1 M NaCl, 20 mM imidazole, 10% glycerol, 1 mM PMSF and cOmplete EDTA-free protease inhibitors (Roche)) and lysed by 5 passages through an M-110L Microfluidizer processor (Microfluidics). After centrifugation (30 min 50,000 x g, 4°C), the cleared lysate was loaded onto a 5 ml HisTrap HP column (GE Healthcare) pre-equilibrated with running buffer (50 mM Tris-HCl pH 8.0 (4°C), 1 M NaCl, 20 mM imidazole, 10% glycerol). After washing the column with running buffer, the His<sub>6</sub>-tagged MMLV\_mut reverse transcriptase was eluted with 25 mM Tris-HCl pH 8.0, 500 mM NaCl, 200 mM imidazole and 10% glycerol. To remove the affinity tag, thrombin protease (Merck) was added to the His<sub>6</sub>-MMLV\_mut protein and the sample was incubated overnight at 8°C in cleavage buffer (20 mM Tris pH 8.0, 250 mM NaCl, 100 mM imidazole, 2.5 mM CaCl<sub>2</sub>, 10% glycerol). After thrombin cleavage, the sample was diluted 1:1 with 20 mM Tris pH 8.0, 10% glycerol to lower the amount of salt and facilitate binding to the ion exchange column. The diluted sample (20 mM Tris pH 8.0 (4°C), 125 mM NaCl, 50 mM imidazole, 1.25 mM CaCl<sub>2</sub>, 10% glycerol) was loaded onto a 5 ml HiTrap Q HP and a 5 ml HiTrap SP HP (GE Healthcare) column that were coupled in tandem. After washing both columns with 20 mM Hepes pH 7.0, 100 mM NaCl and 10% glycerol, the HiTrap Q HP column was removed and the HiTrap SP HP column was eluted in a gradient to 20 mM Hepes pH 7.0, 1 M NaCl and 10% glycerol over 12 column volumes. Finally, the MMLV\_mut protein was loaded onto a HiLoad 16/600 Superdex 200 pg (GE Healthcare) size exclusion chromatography column equilibrated with SEC buffer (40 mM Tris-HCl pH 7.5 (25°C), 200 mM KCl). The fractions containing the MMLV\_mut enzyme were pooled and concentrated to 4.3 mg/ml. The final protein was stored at -20°C in 20 mM Tris pH 7.5 (25°C), 100 mM KCl, 1 mM DTT, 0.1 mM EDTA, 0.01% NP40 and 50% glycerol at a concentration of 2 mg/ml. The yield obtained from 2 liters of expression culture amounted to 120 mg of MMLV\_mut reverse transcriptase.

### Expression and purification of Pfu-Sso7d polymerase

The pET-His<sub>10</sub>-GS-TEV-Pfu-Sso7d construct was transformed into *E. coli* Rosetta™ 2 (DE3) (Novagen) cells. Cells were grown in TB-FB auto-induction medium supplemented with 30 µg/ml kanamycin and 34 µg/ml chloramphenicol at 37°C until OD<sub>600</sub> ~ 0.8. The temperature was then lowered to 18°C and the cells were grown further overnight at 18°C. The next morning, the cells were

harvested by centrifugation. The cell pellet was resuspended in running buffer (50 mM Tris-HCl pH 8.0 (4°C), 1 M NaCl, 20 mM imidazole, 10% glycerol, 1 mM PMSF (Sigma) and cOmplete EDTA-free protease inhibitors (Roche)) and lysed by 5 passages through a microfluidizer device. Next, the lysate was heat-shocked for 45 minutes at 80°C before being cooled down on ice. After centrifugation (30 min., 50000 x g, 4°C), the cleared lysate was loaded onto two 1 ml HisTrap HP columns (GE Healthcare) that were coupled in tandem and pre-equilibrated with running buffer (50 mM Tris-HCl pH 8.0 (4°C), 1 M NaCl, 20 mM imidazole and 10% glycerol). After washing with running buffer, the His<sub>10</sub>-tagged Pfu-Sso7d polymerase was eluted with 50 mM Tris-HCl pH 8.0 (4°C), 150 mM NaCl, 400 mM imidazole and 10% glycerol. To remove the affinity tag, His<sub>10</sub>-tagged TEV protease was added to the sample in a 1:100 ratio and the mixture was then diluted 10-fold with 20 mM Tris pH 8.0 (4°C), 100 mM NaCl and 10% glycerol. The cleavage reaction was allowed to continue for 4 hours at room temperature. After TEV cleavage, the sample was loaded onto a 5 ml HiTrap Heparin HP column (GE Healthcare) pre-equilibrated with 20 mM Tris pH 8.0 (4°C), 100 mM NaCl and 10% glycerol. After washing, the Heparin column was eluted in a gradient to 20 mM Tris pH 8.0 (4°C), 500 mM NaCl and 10% glycerol over 40 column volumes. Finally, the untagged Pfu-Sso7d polymerase was loaded onto a HiLoad 16/600 Superdex 200 pg (GE Healthcare) size exclusion chromatography column equilibrated with SEC buffer (20 mM Tris-HCl pH 7.5 (25°C), 100 mM KCl). The fractions containing the Pfu-Sso7d polymerase were pooled and concentrated to 2.2 mg/ml. The final samples were stored at -20°C in 20 mM Tris pH 7.5 (25°C), 100 mM KCl, 1 mM DTT, 0.1 mM EDTA, 200 µg/ml BSA and 50% glycerol at a concentration of 1 mg/ml. The yield obtained from 1 liter of expression culture amounted to 17 mg of Pfu-Sso7d polymerase. Titration of Pfu-Sso7d against commercial Phusion polymerase revealed that 0.5 µl (0.07 mg/ml) Pfu-Sso7d per 50 µl reaction performed the same as 1U commercial Phusion.

**MMLV\_mut storage Buffer:**

20 mM Tris-HCl, pH 7.5 @ 25°C  
100 mM KCl  
1 mM DTT  
0.1 mM EDTA  
0.01% NP-40  
50% Glycerol

**MMLV\_mut reaction buffers:**

| 1x MMLV_mut buffer                                                      | 5 x MMLV_mut buffer                                                        |
|-------------------------------------------------------------------------|----------------------------------------------------------------------------|
| 50 mM Tris-HCl,<br>pH 8.3 @ 25°C<br>75 mM KCl<br>6 mM MgCl <sub>2</sub> | 250 mM Tris-HCl,<br>pH 8.3 @ 25°C<br>375 mM KCl<br>30 mM MgCl <sub>2</sub> |

| <b>1x MMLV_mut buffer V5</b>                                                                                                           | <b>5 x MMLV_mut buffer V5</b>                                                                                                              |
|----------------------------------------------------------------------------------------------------------------------------------------|--------------------------------------------------------------------------------------------------------------------------------------------|
| 25 mM Tris-HCl pH 8.3 @ 25°C<br>25 mM MOPS pH 7.9 @ 25°C<br>60 mM KCl<br>4 mM MgCl <sub>2</sub><br>5% Glycerol<br>0.006% Igepal CA-630 | 125 mM Tris-HCl pH 8.3 @ 25°C<br>125 mM MOPS pH 7.9 @ 25°C<br>300 mM KCl<br>20 mM MgCl <sub>2</sub><br>25% Glycerol<br>0.03% Igepal CA-630 |

| <b>1x MMLV_mut buffer V7</b>                                                                                                                               | <b>5 x MMLV_mut buffer V7</b>                                                                                                                                   |
|------------------------------------------------------------------------------------------------------------------------------------------------------------|-----------------------------------------------------------------------------------------------------------------------------------------------------------------|
| 25 mM Tris-HCl pH 8.3 @ 25°C<br>25 mM MOPS pH 7.9 @ 25°C<br>60 mM KCl<br>4 mM MgCl <sub>2</sub><br>200 mM Trehalose<br>5% Glycerol<br>0.006% Igepal CA-630 | 125 mM Tris-HCl pH 8.3 @ 25°C<br>125 mM MOPS pH 7.9 @ 25°C<br>300 mM KCl<br>20 mM MgCl <sub>2</sub><br>1000 mM Trehalose<br>25% Glycerol<br>0.03% Igepal CA-630 |

**Pfu-Sso7d storage Buffer:**

20 mM Tris-HCl, pH 7.5 @ 25°C  
100 mM KCl  
1 mM DTT  
0.1 mM EDTA  
200 µg/ml BSA  
50% Glycerol

**Pfu-Sso7d reaction Buffers:**

*Source: PepCore EMBL*

| <b>1x HF buffer V1</b>                                                                                                                                          | <b>10x HF buffer V1</b>                                                                                                                                          |
|-----------------------------------------------------------------------------------------------------------------------------------------------------------------|------------------------------------------------------------------------------------------------------------------------------------------------------------------|
| 20 mM Tris-HCl pH 8.8 @ 25°C<br>60 mM KCl<br>10 mM (NH <sub>4</sub> ) <sub>2</sub> SO <sub>4</sub><br>2 mM MgCl <sub>2</sub><br>0.1% Triton-100<br>0.01 mM EDTA | 200 mM Tris-HCl pH 8.8 @ 25°C<br>600 mM KCl<br>100 mM (NH <sub>4</sub> ) <sub>2</sub> SO <sub>4</sub><br>20 mM MgCl <sub>2</sub><br>1% Triton-100<br>0.1 mM EDTA |

| <b>1x HF buffer V2</b>                                                                                                                                  | <b>5x HF buffer V2</b>                                                                                                                                    |
|---------------------------------------------------------------------------------------------------------------------------------------------------------|-----------------------------------------------------------------------------------------------------------------------------------------------------------|
| 30 mM Tris-HCl (pH 10 @ 25°C)<br>10 mM KCl<br>10 mM (NH <sub>4</sub> ) <sub>2</sub> OAc<br>2 mM MgSO <sub>4</sub><br>0.1% Triton X-100<br>0.1 mg/ml BSA | 150 mM Tris-HCl (pH 10 @ 25°C)<br>50 mM KCl<br>50 mM (NH <sub>4</sub> ) <sub>2</sub> OAc<br>10 mM MgSO <sub>4</sub><br>0.5% Triton X-100<br>0.5 mg/ml BSA |



| <b>1x HF buffer V3</b>                                                                                                                                                       | <b>5x HF buffer V3</b>                                                                                                                                                          |
|------------------------------------------------------------------------------------------------------------------------------------------------------------------------------|---------------------------------------------------------------------------------------------------------------------------------------------------------------------------------|
| 30 mM Tris-HCl (pH 10 @ 25°C)<br>40 mM K <sub>2</sub> SO <sub>4</sub><br>1 mM (NH <sub>4</sub> ) <sub>2</sub> SO <sub>4</sub><br>2 mM MgSO <sub>4</sub><br>0.1% Triton X-100 | 150 mM Tris-HCl (pH 10 @ 25°C)<br>200 mM K <sub>2</sub> SO <sub>4</sub><br>5 mM (NH <sub>4</sub> ) <sub>2</sub> SO <sub>4</sub><br>10 mM MgSO <sub>4</sub><br>0.5% Triton X-100 |

| <b>1x HF buffer V4</b>                                                                                                                                                              | <b>5x HF buffer V4</b>                                                                                                                                                                |
|-------------------------------------------------------------------------------------------------------------------------------------------------------------------------------------|---------------------------------------------------------------------------------------------------------------------------------------------------------------------------------------|
| 10 mM Tris (pH 8.8 @ 25°C)<br>80 mM KCl<br>16 mM (NH <sub>4</sub> ) <sub>2</sub> SO <sub>4</sub><br>1.5 mM MgCl <sub>2</sub><br>10 mM Arginine<br>200 mM Trehalose<br>0.1% Tween-20 | 50 mM Tris (pH 8.8 @ 25°C)<br>400 mM KCl<br>80 mM (NH <sub>4</sub> ) <sub>2</sub> SO <sub>4</sub><br>7.5 mM MgCl <sub>2</sub><br>50 mM Arginine<br>1000 mM Trehalose<br>0.5% Tween-20 |

| <b>1x HF buffer V5</b>                                                                                                                                                                                   | <b>5x HF buffer V5</b>                                                                                                                                                                                     |
|----------------------------------------------------------------------------------------------------------------------------------------------------------------------------------------------------------|------------------------------------------------------------------------------------------------------------------------------------------------------------------------------------------------------------|
| 10 mM POPSO (pH 8.8 @ 25°C)<br>80 mM KCl<br>16 mM (NH <sub>4</sub> ) <sub>2</sub> SO <sub>4</sub><br>1.5 mM MgCl <sub>2</sub><br>10 mM Arginine<br>200 mM Trehalose<br>100 mM Sarcosine<br>0.1% Tween-20 | 50 mM POPSO (pH 8.8 @ 25°C)<br>400 mM KCl<br>80 mM (NH <sub>4</sub> ) <sub>2</sub> SO <sub>4</sub><br>7.5 mM MgCl <sub>2</sub><br>50 mM Arginine<br>1000 mM Trehalose<br>500 mM Sarcosine<br>0.5% Tween-20 |

Note: *Pfu-Sso7d* Buffers HF V2-V5 are from the following webpage:  
<https://pipettejockey.com/2017/08/18/purifying-commonly-used-enzymes-homebrew-phusion/>

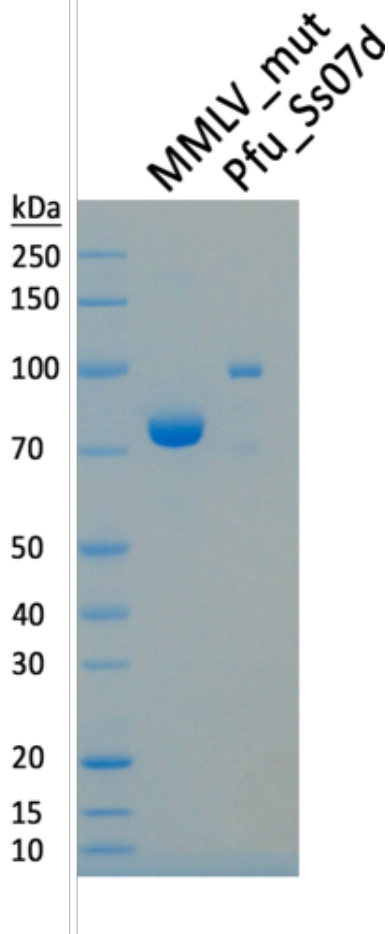

**Figure 1. Purification of homemade enzymes.** SDS-PAGE analysis of His<sub>6</sub> purified MMLV\_mut reverse transcriptase and Pfu-Sso7d polymerase after size exclusion chromatography. The single bands run at molecular weights of 76 kDa (MMLV\_mut) and 98 kDa (Pfu-Sso7d).

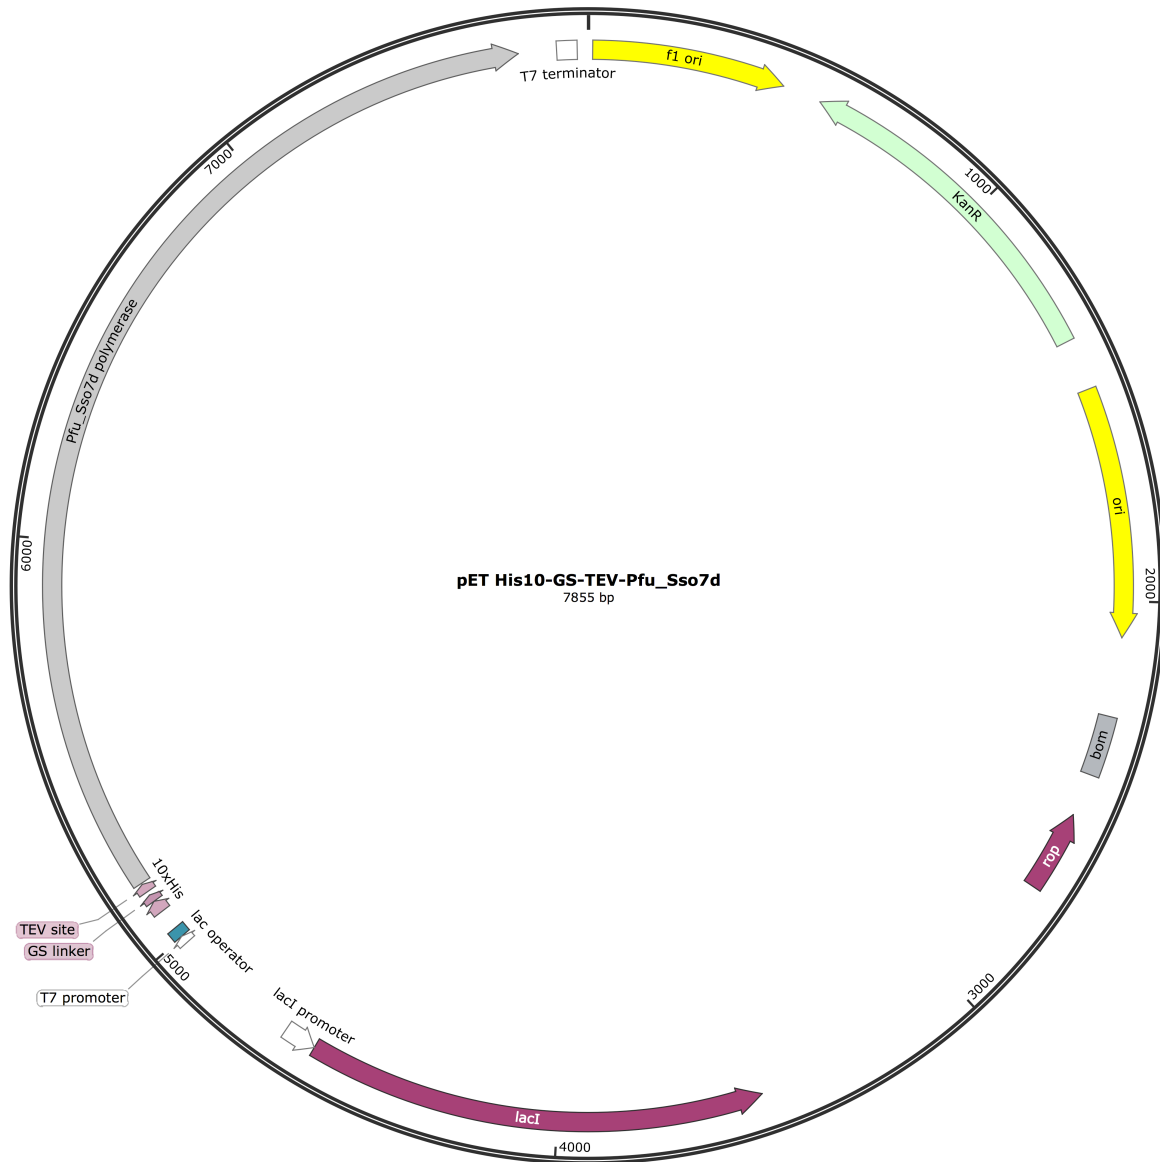

Figure 2. Plasmid map of pET His10-GS-TEV-Pfu-Sso7d.

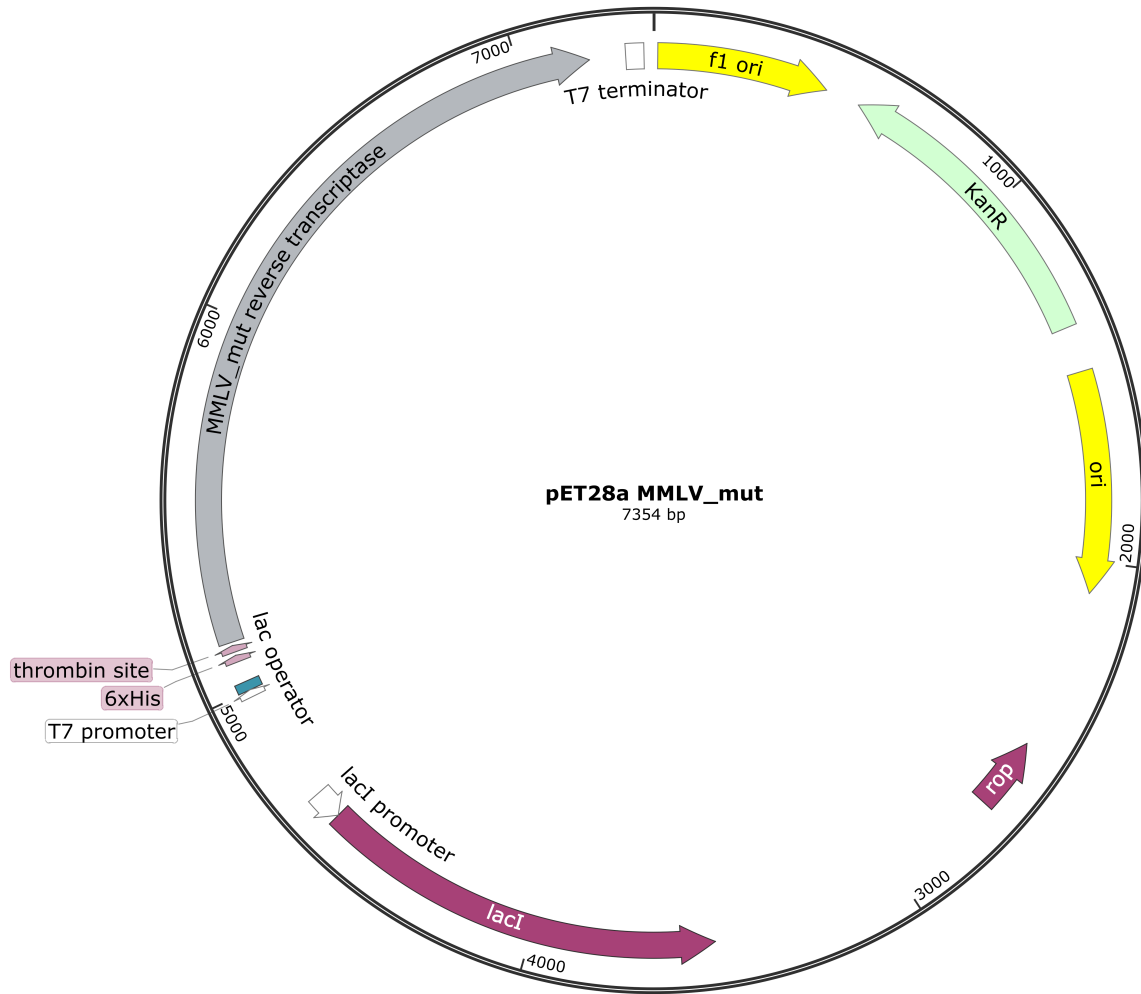

Figure 3. Plasmid map of pET28a MMLV\_mut.

## Supplementary File 3: Automation of the McQ reverse transcription step on the Biomek i7 liquid-handling platform.

Reverse transcription (RT) is the major bottleneck in the McQ workflow. To increase throughput we implemented an automated RT protocol on the Beckman i7 automation system at the EMBL Genomics Core Facility. We believe that the method can easily be implemented on any liquid-handling system, using the original manual protocol as a guideline. Individual steps as programmed on the Biomek i7 are

described in Figure 1, deck layout at start is shown in Figure 2, and chemistry setup in Figure 3. Table 1 lists required consumables for processing two plates. Master mixes are prepared in advance in 1.5 ml tubes and kept on ice until used. Lids have to be cut off tubes immediately prior to start of the protocol. The index master plate (containing the three target-specific barcoded primers and dNTPs in each well) is prepared in a PCR plate as for manual processing. All incubation steps requiring a thermal cycler are run off-deck to allow for parallel processing of several plates. The protocol starts with aliquoting the master-mixes from 1.5 ml tubes into chilled PCR plates. Reaction plates are set up using 10 $\mu$ l extracted RNA and 3 $\mu$ l index master mix, followed by off-deck incubation for RT primer annealing. After incubation plates are placed back on the deck and RT master mix (containing enzyme, buffer and additives) is added. Reverse transcription is performed off-deck, plates are placed back on deck for addition of Exonuclease I, followed by off-deck incubation for ExoI digest, after which the samples are ready for pooling and cleanup. The system prompts the user to clean the deck and shut down the instrument at the end of the protocol.

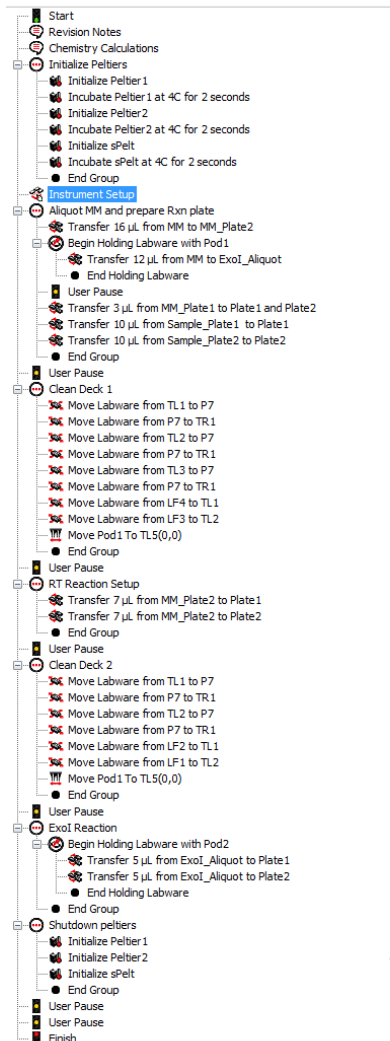

**Figure 1: Workflow for automated reverse transcription implemented on the Biomek i7 platform.** The figure shows a detailed step-by-step workflow of the protocol used for reverse transcription. Steps follow the manual protocol closely and use 10 $\mu$ l extracted RNA as input.

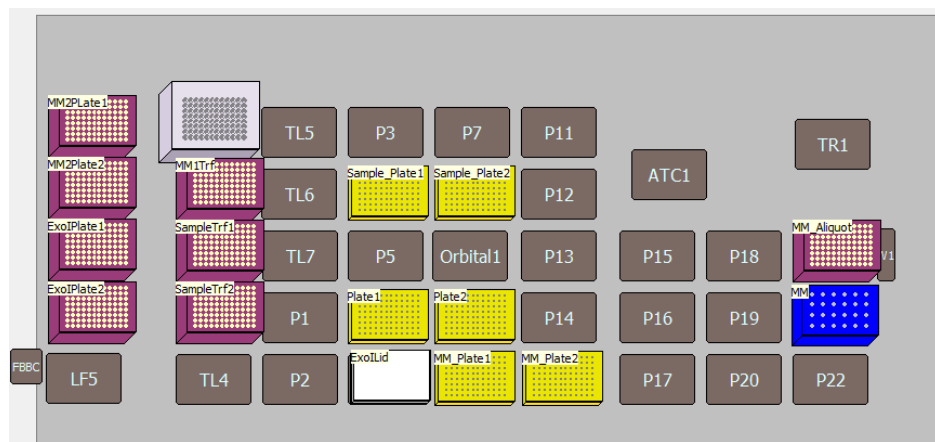

**Figure 2: Deck-layout of the i7 system for reverse transcription.**

Pink boxes are 50ul Beckman tip boxes, yellow plates are BioRad Hard-Shell PCR plates, the white lid is a single use plastic lid by Axon and the blue block is a chilled reagent block for 1.5ml DNA lo-bind Eppendorf tubes.

```

Comment:
Master Mixes in Cooling Block:
Position A1 B1 C1 D1 = each position 465 ul of RTM4 (SSIII) in 1.5ml loBind Eppendorf Tubes
Position A2 B2 C2 D2 = each position 350 ul of ExoIMM in 1.5ml loBind Eppendorf Tubes
Sample plates need to have 20 ul
Index plate should have at least 100 ul (you will be prompted for the volume)
    
```

**Figure 3: Chemistry Setup.**

Setup of the chemistry in the cooling-rack, as well as input criteria for sample and index plate.

| Item            | Provider  | Order #  | Number used (per 2 plates) |
|-----------------|-----------|----------|----------------------------|
| 50 ul tips      | Beckman   | B85888   | 8                          |
| PCR plates      | BioRad    | HSP-9621 | 7                          |
| Plastic lids    | Axon      | 4TI-0290 | 1                          |
| Eppendorf tubes | Eppendorf | 30108051 | 12                         |

**Table 1: Consumables.**

## McQ step by step protocol for 96 samples

*Critical notes before starting:*

- *Pipet everything on ice!*
- *Prepare the index master mix plate prior to starting, this plate can be re-used for processing several 96-well plates. We recommend making a large amount of stock once, in an **area/room free of potential virus** contamination (no synthetic virus material or swab samples handled, and using no equipment or reagents that have been used for processing such samples), and aliquoting the master mix according to anticipated number of plates that are processed per run. Discard the remainder of the aliquot to avoid carrying molecular contamination into following runs.*
- *Prepare RT Buffer V7, Exol dilution buffer, and Pfu-Sso7d HF buffer V5.*
- *Trehalose in RT Buffer V7 will fall out of solution at low temperatures. Trehalose can be re-solubilized by incubation at 40°C in a water bath for 30 minutes (intermittent shaking).*

Preparation step – Make an index master mix plate:

Make an index master mix plate in a PCR plate. This plate can be used for processing several 96-well plates. If oligos are ordered at 100µM first make dilutions of the oligo plate to 10µM. See comments above for aliquoting index master mix.

Add per well:

| Reagent                       | 1X (µl) |
|-------------------------------|---------|
| dNTPs 10 mM                   | 1       |
| Nuclease-free water (NFW)     | 1       |
| Indexed nsp14 RT primer 10 uM | 0.4     |
| Indexed E RT primer 10 uM     | 0.4     |
| Indexed RP RT primer 10 uM    | 0.2     |

Step 1a - Reverse Transcription (manual processing):

*Pipet everything on ice!*

*Prepare RT enzyme mix.*

Add 3 ul index master mix into 96-well plates

Add 10 ul sample

***Incubate 65°C 5 min***

**Place on ice 1 min**

*Note: Take the plate out of the cycler after 5 min and put it on ice immediately, do not let it cool down to 10°C in cycler*

RT enzyme mix:

| Reagent                  | 1X (µl) |
|--------------------------|---------|
| 5X MMLV_mut buffer V7    | 4       |
| NFW                      | 0.5     |
| DTT 100 mM               | 1       |
| RNAse inhibitor          | 0.5     |
| MMLV_mut 0.1 mg/ml stock | 1       |

*Note: Prepare the master mix and aliquot it into 8-well PCR strips, calculating enough mix to process 1.3X the number of samples due to the high viscosity of the RT enzyme mix.*

Add 7 ul master mix to samples

**55°C 30 min**

**70°C 15 min**

Dilute Exonuclease I (Exol) 1:1 in Exol dilution buffer (to reduce viscosity), and add 2 µl diluted Exol to each well (helps with viscosity)

**37°C 30 min**

**85°C 5 min**

Step 1b - Reverse Transcription (Biomek i7):

*Pipet everything on ice!*

Prepare index master mix in yellow Biorad plates (see above)

Prepare samples in yellow Biorad plates (20µl volume)

Prepare 4 tubes of enzyme master mix (per tube 455 ul):

5X V7 buffer 260 ul

NFW 32.5 ul

DTT 100 mM 65 ul

RRI 32.5 ul

SSIII 0.1 mg/ml 65 ul

Prepare 4 tubes of Exol master mix (per tube 350 ul):

Exol 70 ul

Exol dilution buffer 280 ul



Run RT script.

Step 2 – pool and clean cDNA:

- Combine 10 µl of each RT reaction into a single 1.5 ml tube (960µl total)
- Perform 1X (v/v) SPRI cleanup: Add 30 ul SPRI beads to pool, then add 930 ul SPRI buffer (without beads) for a total buffer to sample volume of 1X. Extra buffer can be prepared or obtained from taking the supernatant of 930µl of beads bound on a magnet.
- Mix well and incubate 5 min at room temperature
- Transfer tube to magnet and let bind for 5 minutes (until the solution is completely clear). This can be aided by pipetting up and down several times while the tube is bound on the magnet.
- Remove the buffer and do two washes with 80% ethanol (make sure beads are completely covered), completely remove residual ethanol, and take the tube off the magnet for drying (~1 minute)
- Add 30 µl NFW and resuspend beads, transfer the sample to a PCR tube and incubate for 1-2 minutes
- Transfer to a PCR-tube sized magnet, let beads bind for 1-2 minutes, and transfer eluate to a fresh tube

Step 3 - PCR1:

*Keep mastermix and samples on ice during pipetting as this helps reduce primer dimer.  
Keep reactions on ice and put directly into pre-warmed block (98°C) when using Pfu-Sso7d.*

| <b>Reagent:</b>                | <b>1X MM (µl)</b> |
|--------------------------------|-------------------|
| cDNA                           | 29                |
| PCR1 E fwd primer (2.5 µM)     | 1                 |
| PCR1 nsp14 fwd primer (2.5 µM) | 1                 |
| PCR1 RP fwd primer (2.5 µM)    | 0.5               |
| PCR1 rev primer (2.5 µM)       | 2.5               |
| 5X HF V5                       | 10                |
| dNTPs 10 mM                    | 1                 |
| Pfu-Sso7d (0.7 mg/ml)          | 0.5               |
| NFW                            | 4.5               |
| <b>Total</b>                   | <b>50</b>         |

Add 21 ul master mix to cDNA

Cycler (~55 min):

98°C 30 s

98°C 10 s

62°C 20 s

72°C 20 s

72°C 5 min

30X

Step 4 – SPRI cleanup PCR1:

1.8X SPRI bead cleanup. Add 30  $\mu$ l beads and 60  $\mu$ l SPRI buffer to sample (total buffer volume 90  $\mu$ l), and perform cleanup in PCR tubes, following protocol described in Step 2. Elute in 15  $\mu$ l NFW.

Step 5 - PCR2:

*Keep mastermix and samples on ice during pipetting as this helps reduce primer dimer. Keep reactions on ice and put directly into pre-warmed block (98°C).*

Master mix:

| Reagent               | 1X<br>( $\mu$ l) |
|-----------------------|------------------|
| PCR1                  | 3                |
| 5X HF V5              | 5                |
| dNTPs 10mM            | 0.5              |
| Pfu-Sso7d (0.7 mg/ml) | 0.25             |
| NFW                   | 14.2<br>5        |

Add 1  $\mu$ l 10  $\mu$ M indexed P5

Add 1  $\mu$ l 10  $\mu$ M indexed P7

Cycler (~25 min):

98°C 2 min

98°C 20 s

62°C 30 s

72°C 15 s

72°C 2 min

10X

Step 6 – Exol digest to remove excess index primer (optional):

Add additional Exol step to reduce contamination due to index hopping during sequencing caused by leftover indexed primers.

Add 1 µl Exol directly into amplified PCR 2 and incubate 30 min at 37°C followed by 5 min at 85°C.

Step 7 – SPRI cleanup PCR2:

1X SPRI bead cleanup. Use 25 µl beads and follow protocol in Step 3, elute in 15 µl NFW.

Step 8 – Pooling and QC:

Dilute samples 1:10 and measure concentration with Qubit hsDNA assay. Pool equal amounts (ng) of each pool (adjust according to lowest concentration), check quality on Bioanalyzer, and submit for 75SE sequencing.

Buffers:

| <b>1x MMLV_mut Reaction Buffer V7</b>                                                                                                                      | <b>5 x MMLV_mut Reaction Buffer V7</b>                                                                                                                          |
|------------------------------------------------------------------------------------------------------------------------------------------------------------|-----------------------------------------------------------------------------------------------------------------------------------------------------------------|
| 25 mM Tris-HCl pH 8.3 @ 25°C<br>25 mM MOPS pH 7.9 @ 25°C<br>60 mM KCl<br>4 mM MgCl <sub>2</sub><br>200 mM Trehalose<br>5% Glycerol<br>0.006% Igepal CA-630 | 125 mM Tris-HCl pH 8.3 @ 25°C<br>125 mM MOPS pH 7.9 @ 25°C<br>300 mM KCl<br>20 mM MgCl <sub>2</sub><br>1000 mM Trehalose<br>25% Glycerol<br>0.03% Igepal CA-630 |

*Note: Trehalose is on the limit of solubilization in the 5X buffer due to the addition of 25% Glycerol and might require heating at 40°C to promote complete solubilization.*

*Buffer V7 is adapted from (<https://pipettejockey.com/2019/07/15/mashup-rt-update-2-our-take-on-purification-activity-assays-buffer-optimization/>) by addition of Trehalose.*

| <b>1x Pfu-Sso7d HF buffer V5</b> | <b>5x Pfu-Sso7d HF buffer V5</b> |
|----------------------------------|----------------------------------|
|----------------------------------|----------------------------------|

|                                                       |                                                       |
|-------------------------------------------------------|-------------------------------------------------------|
| 10 mM POPSO (pH 8.8 @ 25°C)                           | 50 mM POPSO (pH 8.8 @ 25°C)                           |
| 80 mM KCl                                             | 400 mM KCl                                            |
| 16 mM (NH <sub>4</sub> ) <sub>2</sub> SO <sub>4</sub> | 80 mM (NH <sub>4</sub> ) <sub>2</sub> SO <sub>4</sub> |
| 1.5 mM MgCl <sub>2</sub>                              | 7.5 mM MgCl <sub>2</sub>                              |
| 10 mM Arginine                                        | 50 mM Arginine                                        |
| 200 mM Trehalose                                      | 1000 mM Trehalose                                     |
| 100 mM Sarcosine                                      | 500 mM Sarcosine                                      |
| 0.1% Tween-20                                         | 0.5% Tween-20                                         |

*Note: HF buffer V5 is from Alexander Klenov*

*(<https://pipettejockey.com/2017/08/18/purifying-commonly-used-enzymes-homebrew-phusion/>)*

#### **Exo I dilution buffer**

10 mM Tris-HCl pH 7.4 @ 25°C  
0.1 mM EDTA  
1 mM DTT  
0.25 M NaCl  
10% Glycerol  
200 µg/ml BSA
